# Supplementary material for: Copper-catalyzed aminothiolation of terminal alkynes with tunable regioselectivity
Source: Royal Society of Chemistry journal article supplement (doi:10.1039/c8cc09122f), 2019-01-01
Supplement: c8cc09122f1.pdf [file c8cc09122f1.pdf]

## *Supporting Information*

### **Copper-Catalyzed Aminothiolation of Terminal Alkynes with Tunable Regioselectivity**

Jinqiang Kuang, Yuanzhi Xia\*, An Yang, Heng, Zhang, Chenliang Su\*, Daesung Lee

| <b>Contents</b>                                                    | <b>Page</b>      |
|--------------------------------------------------------------------|------------------|
| <b>General Information</b>                                         | <b>S2</b>        |
| <b>Table S1 and control experiment</b>                             | <b>S3</b>        |
| <b>General Procedure for the synthesis of 3 and 4</b>              | <b>S4 –S5</b>    |
| <b>Syntheses and characterization of 3</b>                         | <b>S6 – S21</b>  |
| <b>Gram-scale synthesis of 3aa</b>                                 | <b>S21</b>       |
| <b>Syntheses and characterization of 4</b>                         | <b>S22 – S27</b> |
| <b>Gram-scale synthesis of 4na</b>                                 | <b>S27</b>       |
| <b>References</b>                                                  | <b>S27</b>       |
| <b><sup>1</sup>H NMR and <sup>13</sup>C NMR spectra of 3 and 4</b> | <b>S29- S79</b>  |
| <b>Crystal data and structure refinement for 4na</b>               | <b>S80</b>       |

## General Information

All commercially available reagents were used without further purification. Analytical TLC was performed on glass-backed plates pre-coated with silica gel, which were visualized by UV fluorescence ( $\lambda_{\text{max}} = 254 \text{ nm}$ ) and/or by staining with 1% w/v  $\text{KMnO}_4$  in 0.5 M aqueous  $\text{K}_2\text{CO}_3$ .  $^1\text{H}$  NMR and  $^{13}\text{C}$  NMR spectra were measured on a 500 MHz spectrometer ( $^1\text{H}$ : 500 MHz,  $^{13}\text{C}$ : 125 MHz), using  $\text{CDCl}_3$  or  $\text{d}^6\text{-DMSO}$  as the solvent with tetramethylsilane (TMS) as an internal standard at room temperature. All  $^1\text{H}$  NMR spectra are reported in parts per million (ppm) downfield of TMS and were measured relative to the signals at 7.26 ppm ( $\text{CHCl}_3$ ). All  $^{13}\text{C}$  NMR spectra were reported in ppm relative to residual  $\text{CHCl}_3$  (77.0 ppm) and were obtained with  $^1\text{H}$ -decoupling. Data for  $^1\text{H}$  NMR are described as following: chemical shift ( $\delta$  in ppm), multiplicity (s, singlet; d, doublet; t, triplet; q, quartet; quin, quintet; sep, septet; m, multiplet; br, broad signal), coupling constant (Hz), integration. Data for  $^{13}\text{C}$  NMR are described in terms of chemical shift ( $\delta$  in ppm). High resolution mass spectra were recorded on an ESI-Q-TOF mass spectrometer. Melting points were measured on X4 melting point apparatus and uncorrected.

1-(Prop-2-ynyl)-1*H*-indole **1w**,<sup>[1]</sup> ligand 2,9-diisopropyl-1,10-phenanthroline (**L-2**),<sup>[2]</sup> and 2-[(*E*)-1,2-diiodoethenyl] pyridine (**1n'**)<sup>[3]</sup> were prepared according to the reported procedures.

**Table S1.** Optimization of reaction conditions.<sup>[a]</sup>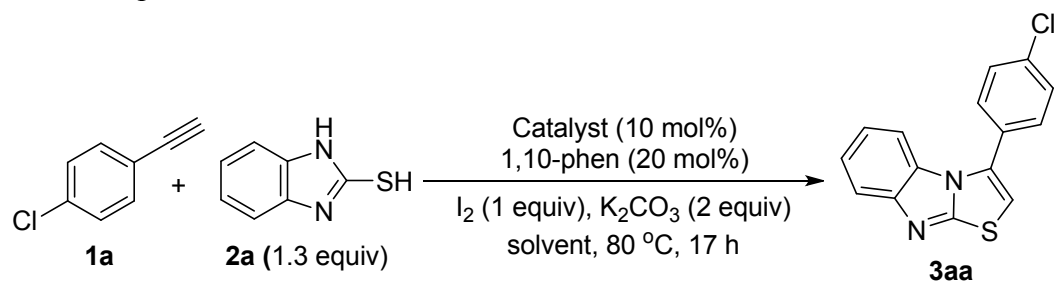

| Entry             | Solvent                 | Catalyst             | Yield of <b>3aa</b><br>(%) <sup>[b]</sup> |
|-------------------|-------------------------|----------------------|-------------------------------------------|
| <b>1</b>          | <b>CH<sub>3</sub>CN</b> | CuI                  | <b>83</b>                                 |
| 2 <sup>[c]</sup>  | CH <sub>3</sub> CN      | CuI                  | 64                                        |
| 3                 | EtOH                    | CuI                  | 79                                        |
| 4                 | MeOH                    | CuI                  | 75                                        |
| 5                 | <i>i</i> -PrOH          | CuI                  | 56                                        |
| 6                 | THF                     | CuI                  | 33                                        |
| 7                 | 1,4-dioxane             | CuI                  | 26                                        |
| 8                 | DME                     | CuI                  | 35                                        |
| 9 <sup>[d]</sup>  | DMSO                    | CuI                  | 24                                        |
| 10 <sup>[d]</sup> | CH <sub>3</sub> CN      | CuBr                 | 59                                        |
| 11 <sup>[d]</sup> | CH <sub>3</sub> CN      | CuCl                 | 55                                        |
| 12 <sup>[d]</sup> | CH <sub>3</sub> CN      | CuCN                 | 42                                        |
| 13 <sup>[d]</sup> | CH <sub>3</sub> CN      | CuBr <sub>2</sub>    | 51                                        |
| 14 <sup>[d]</sup> | CH <sub>3</sub> CN      | Cu(OTf) <sub>2</sub> | 47                                        |
| 15 <sup>[e]</sup> | CH <sub>3</sub> CN      | CuI                  | 75                                        |

[a] Reaction conditions: **1a** (0.2 mmol), **2a** (0.26 mmol), catalyst (0.02 mmol), ligand **L-1** (0.04 mmol), I<sub>2</sub> (0.2 mmol), K<sub>2</sub>CO<sub>3</sub> (0.4 mmol), solvent (1 mL) under air at 80 °C for 17 h. [b] Isolated yield after column chromatography. [c] The reaction was run at 90 °C using 0.2 mmol of **2a**. [d] 0.20 mmol of **2a** (1.0 equiv) was used. [e] 0.28 mmol of **2a** (1.4 equiv) was used.

### Control experiment

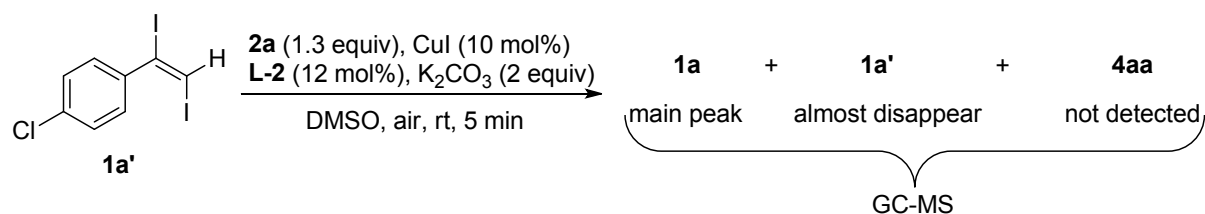

The reaction was run at rt for 5 min and then GC-MS of the reaction mixture was checked. The peak of starting material **1a'** almost disappeared and new big peak of alkyne **1a** appeared, while product **4aa** was not detected. It seems that under the above conditions the conversion of 1,2-diiodoalkene **1a'** to alkyne **1a** was much faster than the reaction of **1a'** with **2a** affording **4aa**.

**General Procedure A for the synthesis of 3-substituted thiazolo[3, 2-a]benzimidazoles 3 (GP-A)**

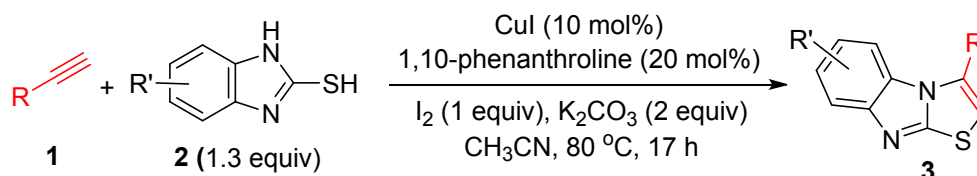

To a Schlenk tube (10 mL) were added I<sub>2</sub> (0.2 mmol), K<sub>2</sub>CO<sub>3</sub> (0.4 mmol), **2** (0.26 mmol), CuI (0.02 mmol), 1,10-phen (L-1) (0.04 mmol), alkyne **1** (0.2 mmol), and 1 mL of CH<sub>3</sub>CN sequentially under air and then the resulting mixture was stirred at room temperature for 2 min. The tube was then sealed and the reaction mixture was stirred at 80 °C for 17 h. After cooling to room temperature, the mixture was filtered through Celite and the filtrate was concentrated. The crude mixture was purified by flash column chromatography on silica gel.

**General Procedure B for the synthesis of 3-substituted thiazolo[3, 2-a]benzimidazoles 3 (GP-B)**

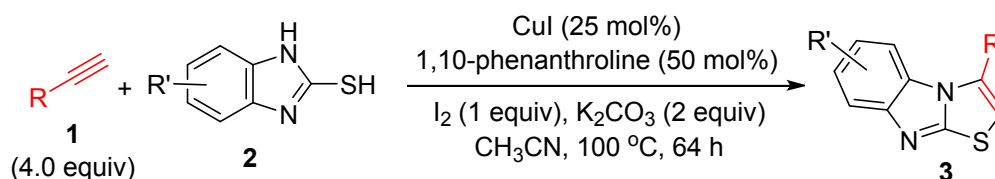

To a Schlenk tube (10 mL) were added I<sub>2</sub> (0.2 mmol), K<sub>2</sub>CO<sub>3</sub> (0.4 mmol), **2** (0.20 mmol), CuI (0.05 mmol), 1,10-phen (L-1) (0.10 mmol), alkyne **1** (0.8 mmol), and 1 mL of CH<sub>3</sub>CN sequentially under air and then the resulting mixture was stirred at room temperature for 2 min. The tube was then sealed and the reaction mixture was stirred at 100 °C for 64 h. After cooling to room temperature, the mixture was filtered through Celite and the filtrate was concentrated. The crude mixture was purified by flash column chromatography on silica gel.

**General Procedure C for the synthesis of 2-substituted thiazolo[3, 2-a]benzimidazoles 4 (GP-C)**

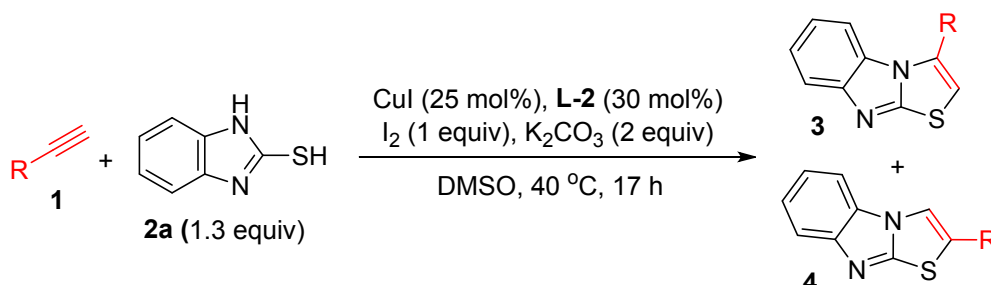

To a Schlenk tube (10 mL) were added **2a** (0.26 mmol), I<sub>2</sub> (0.2 mmol), K<sub>2</sub>CO<sub>3</sub> (0.4 mmol), CuI (0.05 mmol), 2,9-diisopropyl-1,10-phenanthroline (L-2) (0.06 mmol), alkyne **1** (0.2 mmol), and 1 mL of DMSO sequentially under air and then the resulting

mixture was stirred at room temperature for 2 min. The tube was then sealed and the reaction mixture was stirred at 40 °C for 17 h. After cooling to room temperature, the reaction mixture was diluted with EA (20 mL), washed with water (10 mL) and brine (2 x 10 mL), dried over anhydrous Na<sub>2</sub>SO<sub>4</sub>. Filtration, concentration, and purification by flash column chromatography on silica gel afforded the desired products **4**.

## Syntheses and characterization of 3-substituted thiazolo[3, 2-a]benzimidazoles (3)

### 3-(4-Chlorophenyl)thiazolo[3,2-a]benzimidazole (3aa)<sup>[4]</sup>

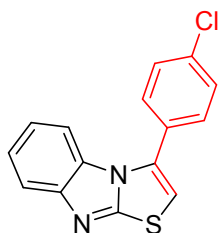

The reaction was performed following **GP-A** with CuI (3.7 mg, 0.02 mmol), 1,10-phen (**L-1**) (7.3 mg, 0.04 mmol), I<sub>2</sub> (51.6 mg, 0.20 mmol), K<sub>2</sub>CO<sub>3</sub> (54.5 mg, 0.39 mmol), 4-chlorophenylacetylene (27.8 mg, 0.20 mmol), 2-mercaptobenzimidazole (39.3 mg, 0.26 mmol), and 1 mL of CH<sub>3</sub>CN at 80 °C. The crude product was purified by flash column chromatography on silica gel (PE/EA = 3/1) to afford the title compound as a white solid (47.9 mg, 83%). Mp 198–199 °C. (lit. Mp 199–201 °C).

<sup>1</sup>H NMR (500.13 MHz, CDCl<sub>3</sub>) δ 7.79 (d, *J* = 8.5 Hz, 1 H), 7.59 (d, *J* = 8.5 Hz, 2 H), 7.54 (d, *J* = 8.0 Hz, 2 H), 7.33 (t, *J* = 8.0 Hz, 1 H), 7.20 (d, *J* = 8.5 Hz, 1 H), 7.08 (t, *J* = 8.0 Hz, 1 H), 6.60 (s, 1 H); <sup>13</sup>C NMR (125.76 MHz, CDCl<sub>3</sub>) δ 157.0, 148.7, 136.3, 132.9, 130.0, 129.9, 129.3, 127.8, 123.4, 120.5, 119.3, 111.4, 107.7.

### 3-(4-Bromophenyl)thiazolo[3,2-a]benzimidazole (3ba)<sup>[4]</sup>

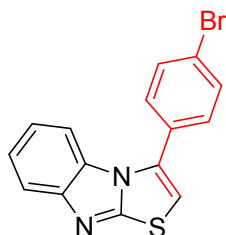

The reaction was performed following **GP-A** with CuI (3.7 mg, 0.02 mmol), 1,10-phen (**L-1**) (7.6 mg, 0.04 mmol), I<sub>2</sub> (50.5 mg, 0.20 mmol), K<sub>2</sub>CO<sub>3</sub> (56.0 mg, 0.41 mmol), 4-bromophenylacetylene (36.3 mg, 0.20 mmol), 2-mercaptobenzimidazole (39.3 mg, 0.26 mmol), and 1 mL of CH<sub>3</sub>CN at 80 °C. The crude product was purified by flash column chromatography on silica gel (PE/EA = 3/1) to afford the title compound as a white solid (43.2 mg, 65%). Mp 198–199 °C. (lit. Mp 205–206 °C).

<sup>1</sup>H NMR (500.13 MHz, CDCl<sub>3</sub>) δ 7.79 (d, *J* = 8.5 Hz, 1 H), 7.71 (d, *J* = 8.5 Hz, 2 H), 7.53 (d, *J* = 8.0 Hz, 2 H), 7.33 (t, *J* = 7.8 Hz, 1 H), 7.21 (d, *J* = 8.0 Hz, 1 H), 7.08 (t, *J* = 7.8 Hz, 1 H), 6.61 (s, 1 H); <sup>13</sup>C NMR (125.76 MHz, CDCl<sub>3</sub>) δ 157.0, 148.7, 133.0, 132.2, 130.2, 129.9, 128.2, 124.5, 123.5, 120.5, 119.3, 111.4, 107.7.

### 3-(4-Fluorophenyl)thiazolo[3,2-a]benzimidazole (3ca)<sup>[5,6]</sup>

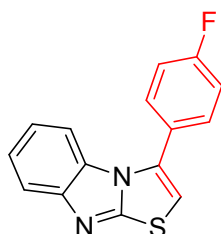

The reaction was performed following **GP-A** with CuI (3.7 mg, 0.02 mmol), 1,10-phen (**L-1**) (7.3 mg, 0.04 mmol), I<sub>2</sub> (50.6 mg, 0.20 mmol), K<sub>2</sub>CO<sub>3</sub> (55.8 mg, 0.41 mmol), 4-fluorophenylacetylene (24.1 mg, 0.20 mmol), 2-mercaptobenzimidazole (39.7 mg, 0.26 mmol), and 1 mL of CH<sub>3</sub>CN at 80 °C. The crude product was purified by flash column chromatography on silica gel (PE/EA = 3/1) to afford the title compound as a white solid (46.0 mg, 85%). Mp 159–160 °C (lit.<sup>[5]</sup> Mp 145–147 °C; lit.<sup>[6]</sup> Mp 174–177 °C ).

**<sup>1</sup>H NMR (500.13 MHz, CDCl<sub>3</sub>)** δ 7.79 (d, *J* = 8.0 Hz, 1 H), 7.64 (dd, *J* = 7.5, 5.5 Hz, 2 H), 7.33 (t, *J* = 7.8 Hz, 1 H), 7.27 (t, *J* = 8.3 Hz, 2 H), 7.17 (d, *J* = 8.5 Hz, 1 H), 7.08 (t, *J* = 7.8 Hz, 1 H), 6.59 (s, 1 H); **<sup>13</sup>C NMR (125.76 MHz, CDCl<sub>3</sub>)** δ 163.7 (d, *J* = 250.9 Hz), 157.0, 148.7, 133.1, 130.9 (d, *J* = 7.7 Hz), 130.0, 125.5 (d, *J* = 4.0 Hz), 123.4, 120.5, 119.3, 116.2 (d, *J* = 22.4 Hz), 111.4, 107.4.

### 3-(4-Cyanophenyl)thiazolo[3,2-a]benzimidazole (**3da**)

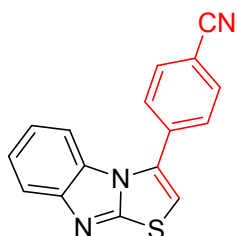

The reaction was performed following **GP-A** with CuI (3.7 mg, 0.02 mmol), 1,10-phen (**L-1**) (7.1 mg, 0.04 mmol), I<sub>2</sub> (51.5 mg, 0.20 mmol), K<sub>2</sub>CO<sub>3</sub> (55.7 mg, 0.40 mmol), 4-ethynylbenzonitrile (25.6 mg, 0.20 mmol), 2-mercaptobenzimidazole (38.7 mg, 0.26 mmol), and 1 mL of CH<sub>3</sub>CN at 80 °C. The crude product was purified by flash column chromatography on silica gel (PE/EA = 2/1 to 1/1) to afford the title compound as a yellow solid (42.2 mg, 76%). Mp 249–252 °C.

**<sup>1</sup>H NMR (500.13 MHz, d<sub>6</sub>-DMSO)** δ 8.12 (d, *J* = 8.0 Hz, 2 H), 7.99 (d, *J* = 8.5 Hz, 2 H), 7.73 (d, *J* = 8.0 Hz, 1 H), 7.42 (s, 1 H), 7.34 (t, *J* = 7.3 Hz, 1 H), 7.21 (d, *J* = 8.0 Hz, 1 H), 7.14 (t, *J* = 7.5 Hz, 1 H); **<sup>13</sup>C NMR (125.76 MHz, DMSO-*d*<sub>6</sub>)** δ 156.6, 148.2, 133.4, 133.0, 131.8, 129.6, 123.2, 120.6, 118.8, 118.4, 112.6, 111.6, 110.0; **HRMS** calcd for C<sub>16</sub>H<sub>10</sub>N<sub>3</sub>S [M+H]<sup>+</sup>: 276.0590. Found: 276.0586.

### 3-(4-Nitrophenyl)thiazolo[3,2-a]benzimidazole (**3ea**)<sup>[4]</sup>

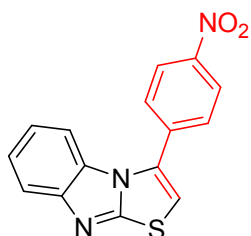

The reaction was performed following **GP-A** with CuI (3.9 mg, 0.02 mmol), 1,10-phen (**L-1**) (7.4 mg, 0.04 mmol), I<sub>2</sub> (51.2 mg, 0.20 mmol), K<sub>2</sub>CO<sub>3</sub> (56.0 mg, 0.41 mmol), 1-ethynyl-4-nitrobenzene (29.0 mg, 0.20 mmol), 2-mercaptobenzimidazole (39.3 mg, 0.26 mmol), and 1 mL of CH<sub>3</sub>CN at 80 °C. The crude product was purified by flash column chromatography on silica gel (PE/EA = 3/1 to 1/1) to afford the title compound as a yellow solid (31.5 mg, 54%). Mp 256–258 °C. (lit. Mp 258–260 °C).

**<sup>1</sup>H NMR (500.13 MHz, DMSO-*d*<sub>6</sub>)** δ 8.47 (d, *J* = 8.5 Hz, 2 H), 8.07 (d, *J* = 8.5 Hz, 2 H), 7.74 (d, *J* = 8.0 Hz, 1 H), 7.48 (s, 1 H), 7.35 (t, *J* = 7.5 Hz, 1 H), 7.26 (d, *J* = 8.0 Hz, 1 H), 7.15 (t, *J* = 7.8 Hz, 1 H); **<sup>13</sup>C NMR (125.76 MHz, DMSO-*d*<sub>6</sub>)** δ 156.6, 148.2, 135.1, 131.5, 130.0, 129.6, 124.2, 123.3, 120.6, 118.9, 111.7, 111.5.

### 3-(4-Formylphenyl)thiazolo[3,2-*a*]benzimidazole (3fa)

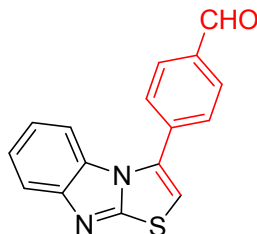

The reaction was performed following **GP-A** with CuI (3.8 mg, 0.02 mmol), 1,10-phen (**L-1**) (7.3 mg, 0.04 mmol), I<sub>2</sub> (50.5 mg, 0.20 mmol), K<sub>2</sub>CO<sub>3</sub> (55.6 mg, 0.40 mmol), 4-ethynylbenzaldehyde (25.7 mg, 0.20 mmol), 2-mercaptobenzimidazole (39.1 mg, 0.26 mmol), and 1 mL of CH<sub>3</sub>CN at 80 °C. The crude product was purified by flash column chromatography on silica gel (PE/EA = 2/1) to afford the title compound as a yellow solid (34.0 mg, 62%). Mp 185–186 °C.

**<sup>1</sup>H NMR (500.13 MHz, CDCl<sub>3</sub>)** δ 10.14 (s, 1 H), 8.08 (d, *J* = 8.0 Hz, 2 H), 7.85 (d, *J* = 8.0 Hz, 2 H), 7.80 (d, *J* = 8.0 Hz, 1 H), 7.34 (t, *J* = 7.8 Hz, 1 H), 7.23 (d, *J* = 8.5 Hz, 1 H), 7.09 (t, *J* = 8.0 Hz, 1 H), 6.74 (s, 1 H); **<sup>13</sup>C NMR (125.76 MHz, CDCl<sub>3</sub>)** δ 191.2, 157.1, 148.7, 137.2, 134.9, 133.0, 130.1, 129.9, 129.1, 123.6, 120.7, 119.5, 111.5, 109.1; **HRMS** calcd for C<sub>16</sub>H<sub>11</sub>N<sub>2</sub>OS [M+H]<sup>+</sup>: 279.0587. Found: 279.0581.

### 3-(4-Methoxyphenyl)thiazolo[3,2-*a*]benzimidazole (3ga)<sup>[4,5]</sup>

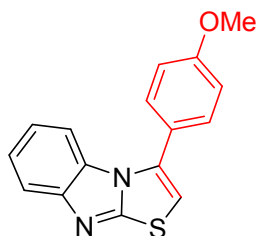

The reaction was performed following **GP-A** with CuI (3.9 mg, 0.02 mmol), 1,10-phen (**L-1**) (7.3 mg, 0.04 mmol), I<sub>2</sub> (51.0 mg, 0.20 mmol), K<sub>2</sub>CO<sub>3</sub> (55.8 mg, 0.40 mmol), 1-ethynyl-4-methoxybenzene (26.5 mg, 0.20 mmol), 2-mercaptobenzimidazole (39.5 mg, 0.26 mmol), and 1 mL of CH<sub>3</sub>CN at 80 °C. The crude product was purified by flash column chromatography on silica gel (PE/EA = 3/1) to afford the title compound as a white solid (46.0 mg, 82%). Mp 149–150 °C. (lit. Mp 148–150 °C).

**<sup>1</sup>H NMR (500.13 MHz, CDCl<sub>3</sub>)** δ 7.78 (d, *J* = 8.0 Hz, 1 H), 7.55 (d, *J* = 8.5 Hz, 2 H), 7.30 (t, *J* = 7.8 Hz, 1 H), 7.23 (d, *J* = 8.5 Hz, 1 H), 7.08–7.00 (m, 3 H), 6.49 (s, 1 H), 3.91 (s, 3 H); **<sup>13</sup>C NMR (125.76 MHz, CDCl<sub>3</sub>)** δ 160.9, 157.1, 148.7, 134.0, 130.2, 130.1, 123.2, 121.5, 120.2, 119.1, 114.3, 111.6, 106.2, 55.4.

### 3-(4-Propylphenyl)thiazolo[3,2-*a*]benzimidazole (3ha)



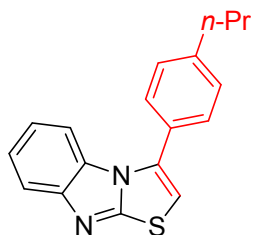

The reaction was performed following **GP-A** with CuI (3.9 mg, 0.02 mmol), 1,10-phen (**L-1**) (7.2 mg, 0.04 mmol), I<sub>2</sub> (50.4 mg, 0.20 mmol), K<sub>2</sub>CO<sub>3</sub> (56.3 mg, 0.41 mmol), 1-ethynyl-4-propylbenzene (29.1 mg, 0.20 mmol), 2-mercaptobenzimidazole (38.9 mg, 0.26 mmol), and 1 mL of CH<sub>3</sub>CN at 80 °C. The crude product was purified by flash column chromatography on silica gel (PE/EA = 3/1) to afford the title compound as a colourless liquid (47.4 mg, 80%).

**<sup>1</sup>H NMR (500.13 MHz, CDCl<sub>3</sub>)** δ 7.78 (d, *J* = 8.5 Hz, 1 H), 7.54 (d, *J* = 8.0 Hz, 2 H), 7.36 (d, *J* = 8.5 Hz, 2 H), 7.31 (t, *J* = 7.5 Hz, 1 H), 7.25 (d, *J* = 8.0 Hz, 1 H), 7.05 (t, *J* = 7.5 Hz, 1 H), 6.53 (s, 1 H), 2.71 (t, *J* = 7.5 Hz, 2 H), 1.79-1.67 (m, 2 H), 1.01 (t, *J* = 7.5 Hz, 3 H); **<sup>13</sup>C NMR (125.76 MHz, CDCl<sub>3</sub>)** δ 157.2, 148.7, 145.0, 134.3, 130.1, 128.9, 128.6, 126.6, 123.2, 120.3, 119.1, 111.7, 106.6, 37.8, 24.3, 13.8; **HRMS** calcd for C<sub>18</sub>H<sub>17</sub>N<sub>2</sub>S [M+H]<sup>+</sup>: 293.1107. Found: 293.1108.

### 3-(4-Methylphenyl)thiazolo[3,2-a]benzimidazole (**3ia**)<sup>[4-6]</sup>

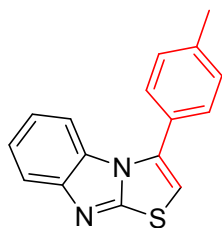

The reaction was performed following **GP-A** with CuI (3.8 mg, 0.02 mmol), 1,10-phen (**L-1**) (7.2 mg, 0.04 mmol), I<sub>2</sub> (51.8 mg, 0.20 mmol), K<sub>2</sub>CO<sub>3</sub> (55.4 mg, 0.40 mmol), 4-ethynyltoluene (23.5 mg, 0.20 mmol), 2-mercaptobenzimidazole (38.7 mg, 0.26 mmol), and 1 mL of CH<sub>3</sub>CN at 80 °C. The crude product was purified by flash column chromatography on silica gel (PE/EA = 3/1) to afford the title compound as a white solid (47.4 mg, 80%). Mp 120–122 °C. (lit.<sup>[4]</sup> Mp 118–121 °C).

**<sup>1</sup>H NMR (500.13 MHz, CDCl<sub>3</sub>)** δ 7.79 (d, *J* = 8.0 Hz, 1 H), 7.53 (d, *J* = 8.0 Hz, 2 H), 7.36 (d, *J* = 7.5 Hz, 2 H), 7.31 (t, *J* = 7.8 Hz, 1 H), 7.25 (d, *J* = 8.0 Hz, 1 H), 7.06 (t, *J* = 7.5 Hz, 1 H), 6.54 (s, 1 H), 2.49 (s, 3 H); **<sup>13</sup>C NMR (125.76 MHz, CDCl<sub>3</sub>)** δ 157.2, 148.7, 140.3, 134.3, 130.1, 129.6, 128.7, 126.5, 123.2, 120.3, 119.1, 111.7, 106.6, 21.4.

### 3-Phenylthiazolo[3,2-a]benzimidazole (**3ja**)<sup>[4-6]</sup>

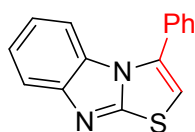

The reaction was performed following **GP-A** with CuI (4.0 mg, 0.02 mmol), 1,10-phen (**L-1**) (7.6 mg, 0.04 mmol), I<sub>2</sub> (51.0 mg, 0.20 mmol), K<sub>2</sub>CO<sub>3</sub> (55.2 mg, 0.40

mmol), phenylacetylene (21.9  $\mu$ L,  $d = 0.93$  g/mL, 20.4 mg, 0.20 mmol), 2-mercaptobenzimidazole (38.5 mg, 0.26 mmol), and 1 mL of CH<sub>3</sub>CN at 80 °C. The crude product was purified by flash column chromatography on silica gel (PE/EA = 4/1) to afford the title compound as a white solid (44.0 mg, 88%). Mp 137–138 °C. (lit.<sup>[4]</sup> Mp 138–140 °C).

**<sup>1</sup>H NMR (500.13 MHz, CDCl<sub>3</sub>)**  $\delta$  7.80 (d,  $J = 8.0$  Hz, 1 H), 7.70–7.63 (m, 2 H), 7.61–7.52 (m, 3 H), 7.33 (t,  $J = 7.5$  Hz, 1 H), 7.23 (d,  $J = 8.5$  Hz, 1 H), 7.07 (t,  $J = 7.8$  Hz, 1 H), 6.61 (s, 1 H); **<sup>13</sup>C NMR (125.76 MHz, CDCl<sub>3</sub>)**  $\delta$  157.2, 148.7, 134.3, 130.12, 130.08, 129.4, 129.0, 128.8, 123.4, 120.4, 119.2, 111.7, 107.2.

### 3-(3,5-Bis(trifluoromethyl)phenyl)thiazolo[3,2-a]benzimidazole (3ka)

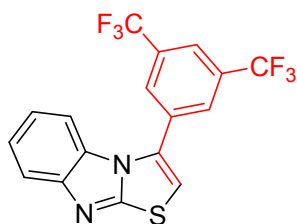

The reaction was performed following **GP-A** with CuI (3.8 mg, 0.02 mmol), 1,10-phen (**L-1**) (7.4 mg, 0.04 mmol), I<sub>2</sub> (50.5 mg, 0.20 mmol), K<sub>2</sub>CO<sub>3</sub> (54.7 mg, 0.40 mmol), 1-ethynyl-3,5-bis(trifluoromethyl)benzene (35.4  $\mu$ L,  $d = 1.346$  g/mL, 47.6 mg, 0.20 mmol), 2-mercaptobenzimidazole (39.1 mg, 0.26 mmol), and 1 mL of CH<sub>3</sub>CN at 80 °C. The crude product was purified by flash column chromatography on silica gel (PE/EA = 3/1) to afford the title compound as a yellow solid (62.1 mg, 80%). Mp 120–122 °C.

**<sup>1</sup>H NMR (500.13 MHz, CDCl<sub>3</sub>)**  $\delta$  8.17 (s, 2 H), 8.11 (s, 1 H), 7.85 (d,  $J = 8.0$  Hz, 1 H), 7.40 (t,  $J = 7.8$  Hz, 1 H), 7.16 (t,  $J = 7.8$  Hz, 1 H), 7.10 (d,  $J = 8.0$  Hz, 1 H), 6.86 (s, 1 H); **<sup>13</sup>C NMR (125.76 MHz, CDCl<sub>3</sub>)**  $\delta$  156.9, 148.8, 132.8 (q,  $J = 33.6$  Hz), 131.6, 131.0, 129.8, 128.79, 128.77, 123.9, 123.7 (sep,  $J = 3.6$  Hz), 122.8 (q,  $J = 273.1$  Hz), 121.1, 119.8, 110.9, 110.3; **HRMS** calcd for C<sub>17</sub>H<sub>9</sub>F<sub>6</sub>N<sub>2</sub>S [M+H]<sup>+</sup>: 387.0385. Found: 387.0393.

### 3-Thiophen-2-ylthiazolo[3,2-a]benzimidazole (3la)<sup>[4, 5]</sup>

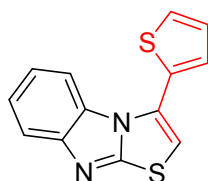

The reaction was performed following **GP-A** with CuI (3.8 mg, 0.02 mmol), 1,10-phen (**L-1**) (7.5 mg, 0.04 mmol), I<sub>2</sub> (51.3 mg, 0.20 mmol), K<sub>2</sub>CO<sub>3</sub> (55.6 mg, 0.40 mmol), 2-ethynylthiophene (21.6 mg, 0.20 mmol), 2-mercaptobenzimidazole (39.4 mg, 0.26 mmol), and 1 mL of CH<sub>3</sub>CN at 80 °C. The crude product was purified by flash column chromatography on silica gel (PE/EA = 5/1) to afford the title compound as a white solid (30.1 mg, 59%). Mp 94–95 °C. (lit.<sup>[4]</sup> Mp 94–95 °C).

**<sup>1</sup>H NMR (500.13 MHz, CDCl<sub>3</sub>)**  $\delta$  7.79 (d,  $J = 8.0$  Hz, 1 H), 7.56 (d,  $J = 5.0$  Hz, 1 H), 7.45 (d,  $J = 3.0$  Hz, 1 H), 7.37 (d,  $J = 8.0$  Hz, 1 H), 7.34 (t,  $J = 7.8$  Hz, 1 H), 7.25 (t,  $J$

= 8.0 Hz, 1 H), 7.11 (t,  $J$  = 7.8 Hz, 1 H), 6.72 (s, 1 H);  $^{13}\text{C}$  NMR (125.76 MHz,  $\text{CDCl}_3$ )  $\delta$  156.5, 148.5, 130.0, 129.5, 129.0, 128.1, 127.7, 127.0, 123.5, 120.6, 119.2, 111.5, 109.4.

### 3-Thiophen-2-ylthiazolo[3,2-a]benzimidazole (3ma)

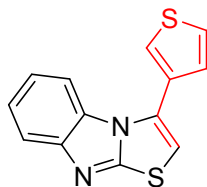

The reaction was performed following **GP-A** with CuI (3.9 mg, 0.02 mmol), 1,10-phen (L-1) (7.4 mg, 0.04 mmol),  $\text{I}_2$  (52.0 mg, 0.20 mmol),  $\text{K}_2\text{CO}_3$  (55.1 mg, 0.40 mmol), 3-ethynylthiophene (21.1 mg, 0.20 mmol), 2-mercaptobenzimidazole (38.7 mg, 0.26 mmol), and 1 mL of  $\text{CH}_3\text{CN}$  at 80 °C. The crude product was purified by flash column chromatography on silica gel (PE/EA = 3/1) to afford the title compound as a white solid (40.1 mg, 80%). Mp 144–147 °C.

$^1\text{H}$  NMR (500.13 MHz,  $\text{CDCl}_3$ )  $\delta$  7.79 (d,  $J$  = 8.5 Hz, 1 H), 7.66 (t,  $J$  = 1.5 Hz, 1 H), 7.56 (dd,  $J$  = 4.5, 3.0 Hz, 1 H), 7.37 (dd,  $J$  = 5.0, 1.0 Hz, 1 H), 7.35–7.28 (m, 2 H), 7.10 (t,  $J$  = 7.8 Hz, 1 H), 6.62 (s, 1 H);  $^{13}\text{C}$  NMR (125.76 MHz,  $\text{CDCl}_3$ )  $\delta$  156.8, 148.5, 130.0, 129.4, 129.3, 127.7, 127.0, 126.4, 123.4, 120.6, 119.1, 111.4, 107.4; HRMS calcd for  $\text{C}_{13}\text{H}_9\text{N}_2\text{S}_2$   $[\text{M}+\text{H}]^+$ : 257.0202. Found: 257.0204.

### 3-Pyridin-2-ylthiazolo[3,2-a]benzimidazole (3na)<sup>[4]</sup>

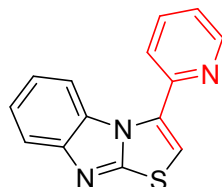

The reaction was performed following **GP-A** with CuI (3.8 mg, 0.02 mmol), 1,10-phen (L-1) (7.3 mg, 0.04 mmol),  $\text{I}_2$  (51.2 mg, 0.20 mmol),  $\text{K}_2\text{CO}_3$  (55.5 mg, 0.40 mmol), 2-ethynylpyridine (21.5 mg, 0.21 mmol), 2-mercaptobenzimidazole (39.5 mg, 0.26 mmol), and 1 mL of  $\text{CH}_3\text{CN}$  at 80 °C. The crude product was purified by flash column chromatography on silica gel (PE/EA = 2/1 to 1/1, with 0.5%  $\text{Et}_3\text{N}$ ) to afford the title compound as a yellow solid (39.9 mg, 76%). Mp 163–165 °C. (lit. Mp 168–170 °C).

$^1\text{H}$  NMR (500.13 MHz,  $\text{CDCl}_3$ )  $\delta$  8.81 (d,  $J$  = 4.5 Hz, 1 H), 7.89–7.80 (m, 2 H), 7.77 (d,  $J$  = 8.0 Hz, 1 H), 7.67 (d,  $J$  = 8.0 Hz, 1 H), 7.42 (dd,  $J$  = 6.8, 5.3 Hz, 1 H), 7.33 (t,  $J$  = 7.8 Hz, 1 H), 7.14 (t,  $J$  = 7.8 Hz, 1 H), 6.90 (s, 1 H);  $^{13}\text{C}$  NMR (125.76 MHz,  $\text{CDCl}_3$ )  $\delta$  157.1, 149.5, 148.62, 148.58, 137.2, 134.5, 130.6, 124.2, 123.4, 122.9, 120.5, 118.9, 113.9, 110.1.

### 3-Pyridin-4-ylthiazolo[3,2-a]benzimidazole (3oa)

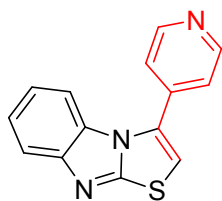

The reaction was performed following **GP-A** with CuI (3.9 mg, 0.02 mmol), 1,10-phen (**L-1**) (7.2 mg, 0.04 mmol), I<sub>2</sub> (51.6 mg, 0.20 mmol), K<sub>2</sub>CO<sub>3</sub> (54.9 mg, 0.40 mmol), 4-ethynylpyridine (20.8 mg, 0.20 mmol), 2-mercaptobenzimidazole (38.8 mg, 0.26 mmol), and 1 mL of CH<sub>3</sub>CN at 80 °C. The crude product was purified by flash column chromatography on silica gel (PE/EA = 1/2, with 0.5% Et<sub>3</sub>N) to afford the title compound as a yellow solid (33.6 mg, 66%). Mp 144–147 °C.

**<sup>1</sup>H NMR (500.13 MHz, CDCl<sub>3</sub>)** δ 8.85 (dd, *J* = 4.5, 1.5 Hz, 2 H), 7.81 (d, *J* = 8.5 Hz, 2 H), 7.60 (d, *J* = 4.5, 1.5 Hz, 2 H), 7.36 (t, *J* = 8.0 Hz, 1 H), 7.30 (d, *J* = 8.0 Hz, 1 H), 7.13 (t, *J* = 8.0 Hz, 1 H), 6.78 (s, 1 H); **<sup>13</sup>C NMR (125.76 MHz, CDCl<sub>3</sub>)** δ 157.0, 150.7, 148.7, 137.1, 131.7, 129.8, 123.8, 122.6, 120.9, 119.6, 111.5, 110.0; **HRMS** calcd for C<sub>14</sub>H<sub>10</sub>N<sub>3</sub>S [M+H]<sup>+</sup>: 252.0590. Found: 252.0599.

### 3-(Cyclohexen-1-yl)thiazolo[3,2-a]benzimidazole (3pa)

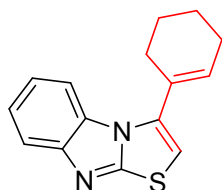

The reaction was performed following **GP-A** with CuI (3.9 mg, 0.02 mmol), 1,10-phen (**L-1**) (7.5 mg, 0.04 mmol), I<sub>2</sub> (50.3 mg, 0.20 mmol), K<sub>2</sub>CO<sub>3</sub> (56.0 mg, 0.41 mmol), 1-ethynylcyclohex-1-ene (21.8 mg, 0.21 mmol), 2-mercaptobenzimidazole (39.4 mg, 0.26 mmol), and 1 mL of CH<sub>3</sub>CN at 80 °C. The crude product was purified by flash column chromatography on silica gel (PE/EA = 3/1) to afford the title compound as a white solid (24.4 mg, 47%). Mp 154–155 °C.

**<sup>1</sup>H NMR (500.13 MHz, CDCl<sub>3</sub>)** δ 7.78 (d, *J* = 8.0 Hz, 1 H), 7.60 (d, *J* = 8.5 Hz, 1 H), 7.34 (t, *J* = 7.8 Hz, 1 H), 7.20 (t, *J* = 7.8 Hz, 1 H), 6.40 (s, 1 H), 6.26-6.20 (m, 1 H), 2.43-2.35 (m, 2 H), 2.34-2.25 (m, 2 H), 1.93-1.86 (m, 2 H), 1.83-1.74 (m, 2 H); **<sup>13</sup>C NMR (125.76 MHz, CDCl<sub>3</sub>)** δ 157.1, 148.6, 136.2, 132.4, 130.0, 127.6, 123.1, 120.5, 119.1, 111.3, 105.1, 28.2, 25.3, 22.4, 21.6; **HRMS** calcd for C<sub>15</sub>H<sub>15</sub>N<sub>2</sub>S [M+H]<sup>+</sup>: 255.0951. Found: 255.0962.

### 3-(Triethylsilyl)thiazolo[3,2-a]benzimidazole (3qa)

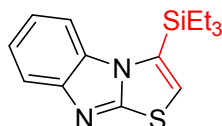

The reaction was performed following slightly modified **GP-A** with CuI (3.9 mg, 0.02 mmol), 1,10-phen (**L-1**) (7.2 mg, 0.04 mmol), I<sub>2</sub> (50.5 mg, 0.20 mmol), K<sub>2</sub>CO<sub>3</sub> (54.9 mg, 0.40 mmol), 2-mercaptobenzimidazole (30.3 mg, 0.20 mmol), (triethylsilyl)acetylene (112.4 mg, 0.80 mmol), and 1 mL of CH<sub>3</sub>CN at 80 °C. The

crude product was purified by flash column chromatography on silica gel (PE/EA = 4/1) to afford the title compound as a colourless liquid (42.0 mg, 72%).

**<sup>1</sup>H NMR (500.13 MHz, CDCl<sub>3</sub>)** δ 7.83-7.65 (m, 2 H), 7.29 (t, *J* = 6.8 Hz, 1 H), 7.19 (t, *J* = 7.5 Hz, 1 H), 6.77 (s, 1 H), 1.03-0.80 (m, 15 H); **<sup>13</sup>C NMR (125.76 MHz, CDCl<sub>3</sub>)** δ 159.6, 148.7, 132.7, 130.7, 123.0, 120.6, 119.9, 119.4, 111.2, 7.2, 3.2; **HRMS** calcd for C<sub>15</sub>H<sub>21</sub>N<sub>2</sub>SSi [M+H]<sup>+</sup>: 289.1190. Found: 289.1194.

### 3-(Trimethylsilyl)thiazolo[3,2-a]benzimidazole (3ra)

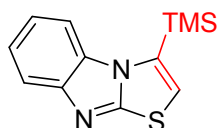

The reaction was performed following slightly modified **GP-A** with CuI (3.6 mg, 0.02 mmol), 1,10-phen (**L-1**) (7.5 mg, 0.04 mmol), I<sub>2</sub> (52.4 mg, 0.21 mmol), K<sub>2</sub>CO<sub>3</sub> (55.5 mg, 0.40 mmol), 2-mercaptobenzimidazole (30.3 mg, 0.20 mmol), (trimethylsilyl)acetylene (79.6 mg, 0.81 mmol), and 1 mL of CH<sub>3</sub>CN at 80 °C. The crude product was purified by flash column chromatography on silica gel (PE/EA = 4/1) to afford the title compound as a colourless liquid (30.4 mg, 61%).

**<sup>1</sup>H NMR (500.13 MHz, CDCl<sub>3</sub>)** δ 7.74 (d, *J* = 8.0 Hz, 1 H), 7.69 (d, *J* = 8.0 Hz, 1 H), 7.29 (t, *J* = 8.0 Hz, 1 H), 7.19 (t, *J* = 7.8 Hz, 1 H), 6.76 (s, 1 H), 0.45 (s, 9 H); **<sup>13</sup>C NMR (125.76 MHz, CDCl<sub>3</sub>)** δ 159.5, 148.5, 135.4, 130.6, 123.0, 120.6, 119.3, 118.9, 111.4, -1.1; **HRMS** calcd for C<sub>12</sub>H<sub>15</sub>N<sub>2</sub>SSi [M+H]<sup>+</sup>: 247.0720. Found: 247.0719.

### 3-(Cyclopropyl)thiazolo[3,2-a]benzimidazole (3sa)<sup>[6]</sup>

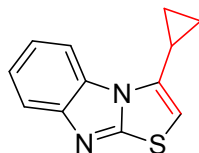

The reaction was performed following **GP-B** with CuI (9.4 mg, 0.05 mmol), 1,10-phen (**L-1**) (18.0 mg, 0.10 mmol), I<sub>2</sub> (50.2 mg, 0.20 mmol), K<sub>2</sub>CO<sub>3</sub> (55.1 mg, 0.40 mmol), cyclopropylacetylene (67.8 μL, d = 0.78 g/mL, 52.9 mg, 0.80 mmol), 2-mercaptobenzimidazole (30.0 mg, 0.20 mmol), and 1 mL of CH<sub>3</sub>CN at 100 °C. The crude product was purified by flash column chromatography on silica gel (PE/EA = 3/1) to afford the title compound as a white solid (28.9 mg, 68%). Mp 82–83 °C. (lit. Mp 101–103 °C).

**<sup>1</sup>H NMR (500.13 MHz, CDCl<sub>3</sub>)** δ 7.99 (d, *J* = 8.5 Hz, 1 H), 7.79 (d, *J* = 8.5 Hz, 1 H), 7.37 (t, *J* = 7.5 Hz, 1 H), 7.25 (t, *J* = 7.8 Hz, 1 H), 6.30 (d, *J* = 1.5 Hz, 1 H), 2.24-2.15 (m, 1 H), 1.18-1.12 (m, 2 H), 0.91-0.83 (m, 2 H); **<sup>13</sup>C NMR (125.76 MHz, CDCl<sub>3</sub>)** δ 156.9, 148.5, 135.8, 130.3, 123.2, 120.6, 119.0, 111.3, 104.5, 8.6, 6.1.

### 3-*tert*-Butylthiazolo[3,2-a]benzimidazole (3ta)<sup>[4,7]</sup>

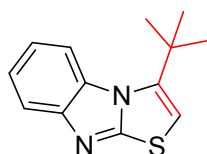

The reaction was performed following **GP-B** with CuI (9.7 mg, 0.05 mmol), 1,10-

phen (**L-1**) (17.9 mg, 0.10 mmol), I<sub>2</sub> (51.9 mg, 0.20 mmol), K<sub>2</sub>CO<sub>3</sub> (56.2 mg, 0.41 mmol), 3,3-dimethylbut-1-yne (98.5  $\mu$ L, d = 0.667 g/mL, 65.7 mg, 0.80 mmol), 2-mercaptobenzimidazole (30.0 mg, 0.20 mmol), and 1 mL of CH<sub>3</sub>CN at 100 °C. The crude product was purified by flash column chromatography on silica gel (PE/EA = 3/1) to afford the title compound as a white solid (28.0 mg, 61%). Mp 48–50 °C. (lit.<sup>[4]</sup> Mp 49–50 °C).

<sup>1</sup>H NMR (500.13 MHz, CDCl<sub>3</sub>)  $\delta$  7.95 (d, *J* = 8.5 Hz, 1 H), 7.81 (d, *J* = 8.0 Hz, 1 H), 7.37 (t, *J* = 7.5 Hz, 1 H), 7.27 (t, *J* = 7.8 Hz, 1 H), 6.40 (s, 1 H), 1.59 (s, 9 H); <sup>13</sup>C NMR (125.76 MHz, CDCl<sub>3</sub>)  $\delta$  158.7, 148.8, 143.9, 130.1, 123.1, 120.4, 119.3, 114.0, 102.9, 33.5, 28.5.

### 3-Butylthiazolo[3,2-a]benzimidazole (**3ua**)<sup>[4,6]</sup>

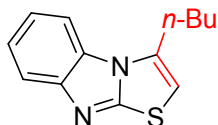

The reaction was performed following **GP-B** with CuI (9.2 mg, 0.05 mmol), 1,10-phen (**L-1**) (18.1 mg, 0.10 mmol), I<sub>2</sub> (51.2 mg, 0.20 mmol), K<sub>2</sub>CO<sub>3</sub> (54.8 mg, 0.40 mmol), hex-1-yne (91.9  $\mu$ L, d = 0.715 g/mL, 65.7 mg, 0.80 mmol), 2-mercaptobenzimidazole (30.3 mg, 0.20 mmol), and 1 mL of CH<sub>3</sub>CN at 100 °C. The crude product was purified by flash column chromatography on silica gel (PE/EA = 3/1) to afford the title compound as a white solid (34.5 mg, 74%). Mp 86–88 °C. (lit.<sup>[4]</sup> Mp 85–87 °C).

<sup>1</sup>H NMR (500.13 MHz, CDCl<sub>3</sub>)  $\delta$  7.79 (d, *J* = 8.5 Hz, 1 H), 7.71 (d, *J* = 8.0 Hz, 1 H), 7.35 (t, *J* = 7.8 Hz, 1 H), 7.24 (t, *J* = 7.5 Hz, 1 H), 6.31 (s, 1 H), 3.03 (t, *J* = 7.8 Hz, 1 H), 1.86–1.76 (m, 2 H), 1.58–1.49 (m, 2 H), 1.01 (t, *J* = 7.5 Hz, 3 H); <sup>13</sup>C NMR (125.76 MHz, CDCl<sub>3</sub>)  $\delta$  157.3, 148.5, 134.5, 130.1, 123.1, 120.6, 119.1, 110.8, 103.7, 28.8, 28.0, 22.2, 13.7.

### *N,N*-Dimethylthiazolo[3,2-a]benzimidazol-3-yl-methanamine (**3va**)

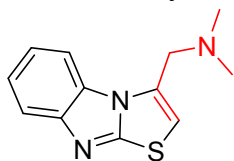

The reaction was performed following slightly modified **GP-A** with CuI (3.7 mg, 0.02 mmol), 1,10-phen (**L-1**) (7.5 mg, 0.04 mmol), I<sub>2</sub> (50.6 mg, 0.20 mmol), K<sub>2</sub>CO<sub>3</sub> (55.1 mg, 0.40 mmol), 1-dimethylamino-2-propyne (66.6 mg, 0.80 mmol), 2-mercaptobenzimidazole (30.4 mg, 0.20 mmol), and 1 mL of CH<sub>3</sub>CN at 80 °C. The crude product was purified by flash column chromatography on silica gel (PE/EA = 1/1, with 0.5% Et<sub>3</sub>N) to afford the title compound as a colourless liquid (27.4 mg, 59%).

<sup>1</sup>H NMR (500.13 MHz, CDCl<sub>3</sub>)  $\delta$  7.85 (d, *J* = 8.5 Hz, 1 H), 7.76 (d, *J* = 8.0 Hz, 1 H), 7.34 (t, *J* = 7.8 Hz, 1 H), 7.24 (t, *J* = 7.5 Hz, 1 H), 6.56 (s, 1 H), 3.71 (s, 2 H), 2.34 (s, 6 H); <sup>13</sup>C NMR (125.76 MHz, CDCl<sub>3</sub>)  $\delta$  157.2, 148.4, 131.8, 130.3, 123.3, 120.8, 118.8, 112.6, 107.7, 56.5, 45.0; HRMS calcd for C<sub>12</sub>H<sub>14</sub>N<sub>3</sub>S [M+H]<sup>+</sup>: 232.0903.

Found: 232.0910.

### 3-((1H-Indol-1-yl)methyl)thiazolo[3,2-a]benzimidazole (3wa)

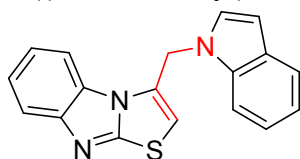

The reaction was performed following **GP-A** with CuI (3.6 mg, 0.019 mmol), 1,10-phen (7.1 mg, 0.039 mmol), I<sub>2</sub> (51.9 mg, 0.20 mmol), K<sub>2</sub>CO<sub>3</sub> (55.5 mg, 0.40 mmol), 1-(2-propyn-1-yl)-1*H*-indole (30.8 mg, 0.20 mmol), 2-mercaptobenzimidazole (38.4 mg, 0.26 mmol), and 1 mL of CH<sub>3</sub>CN at 80 °C. The crude product was purified by flash column chromatography on silica gel (PE/EA = 2/1, with 0.5% Et<sub>3</sub>N) to afford the title compound as a white solid (22.5 mg, 37%). Mp 195–198 °C.

**<sup>1</sup>H NMR (500.13 MHz, CDCl<sub>3</sub>)** δ 7.4 (d, *J* = 8.0 Hz, 1 H), 7.63 (d, *J* = 7.5 Hz, 1 H), 7.48 (d, *J* = 7.8 Hz, 1 H), 7.35–7.25 (m, 2 H), 7.23–7.17 (m, 1 H), 7.15 (d, *J* = 8.0 Hz, 1 H), 7.12 (d, *J* = 7.5 Hz, 1 H), 7.06 (d, *J* = 3.0 Hz, 1 H), 6.54 (d, *J* = 2.5 Hz, 1 H), 6.00 (s, 1 H), 5.64 (s, 2 H); **<sup>13</sup>C NMR (125.76 MHz, CDCl<sub>3</sub>)** δ 157.2, 148.3, 136.1, 129.8, 129.4, 128.9, 127.3, 123.8, 122.6, 121.5, 121.3, 120.4, 119.5, 110.5, 109.1, 107.4, 103.4, 43.9; **HRMS** calcd for C<sub>18</sub>H<sub>14</sub>N<sub>3</sub>S [M+H]<sup>+</sup>: 304.0903. Found: 304.0904.

### 3-Phenoxymethylthiazolo[3,2-a]benzimidazole (3xa)

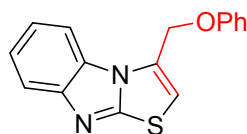

The reaction was performed following **GP-A** with CuI (3.8 mg, 0.02 mmol), 1,10-phen (**L-1**) (7.3 mg, 0.04 mmol), I<sub>2</sub> (51.3 mg, 0.20 mmol), K<sub>2</sub>CO<sub>3</sub> (56.2 mg, 0.41 mmol), phenyl propargyl ether (26.7 mg, 0.20 mmol), 2-mercaptobenzimidazole (39.6 mg, 0.26 mmol), and 1 mL of CH<sub>3</sub>CN at 80 °C. The crude product was purified by flash column chromatography on silica gel (PE/EA = 2/1) to afford the title compound as a white solid (50.0 mg, 88%). Mp 121–122 °C.

**<sup>1</sup>H NMR (500.13 MHz, CDCl<sub>3</sub>)** δ 7.80 (d, *J* = 8.5 Hz, 1 H), 7.67 (d, *J* = 8.5 Hz, 1 H), 7.41–7.31 (m, 3 H), 7.20 (t, *J* = 7.8 Hz, 1 H), 7.07 (t, *J* = 7.5 Hz, 1 H), 7.01 (d, *J* = 8.5 Hz, 2 H), 6.79 (s, 1 H), 5.28 (s, 2 H); **<sup>13</sup>C NMR (125.76 MHz, CDCl<sub>3</sub>)** δ 157.3, 156.8, 148.3, 129.9, 129.8, 129.0, 123.5, 122.2, 121.2, 119.1, 115.0, 111.6, 109.9, 62.3; **HRMS** calcd for C<sub>16</sub>H<sub>13</sub>N<sub>2</sub>OS [M+H]<sup>+</sup>: 281.0743. Found: 281.0750.

### 3-Phenylthiomethylthiazolo[3,2-a]benzimidazole (3ya)

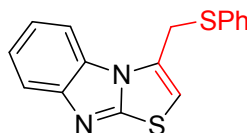

The reaction was performed following **GP-A** with CuI (4.0 mg, 0.02 mmol), 1,10-phen (**L-1**) (7.5 mg, 0.04 mmol), I<sub>2</sub> (51.0 mg, 0.20 mmol), K<sub>2</sub>CO<sub>3</sub> (55.6 mg, 0.40 mmol), phenyl propargyl sulfide (29.4 mg, 0.20 mmol), 2-mercaptobenzimidazole (39.1 mg, 0.26 mmol), and 1 mL of CH<sub>3</sub>CN at 80 °C. The crude product was purified



by flash column chromatography on silica gel (PE/EA = 3/1) to afford the title compound as a liquid (37.2 mg, 63%). Mp 121–123 °C.

**<sup>1</sup>H NMR (500.13 MHz, CDCl<sub>3</sub>)** δ 7.81 (d, *J* = 8.0 Hz, 1 H), 7.77 (d, *J* = 8.5 Hz, 1 H), 7.38 (t, *J* = 7.8 Hz, 1 H), 7.31–7.24 (m, 6 H), 6.23 (s, 1 H), 4.33 (s, 2 H); **<sup>13</sup>C NMR (125.76 MHz, CDCl<sub>3</sub>)** δ 156.9, 148.4, 13.1, 132.4, 129.8, 129.5, 129.2, 128.1, 123.4, 120.9, 119.2, 111.5, 107.6, 32.7; **HRMS** calcd for C<sub>16</sub>H<sub>13</sub>N<sub>2</sub>S<sub>2</sub> [M+H]<sup>+</sup>: 297.0515. Found: 297.0515.

#### Thiazolo[3,2-*a*]benzimidazol-3-yl-ethanol (3za)

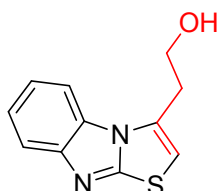

The reaction was performed following slightly modified **GP-A** with CuI (3.8 mg, 0.02 mmol), 1,10-phen (**L-1**) (7.2 mg, 0.04 mmol), I<sub>2</sub> (50.7 mg, 0.20 mmol), K<sub>2</sub>CO<sub>3</sub> (55.9 mg, 0.41 mmol), 3-butyne-1-ol (60.6 μL, d = 0.926 g/mL, 56.1 mg, 0.80 mmol), 2-mercaptobenzimidazole (29.6 mg, 0.20 mmol), and 1 mL of CH<sub>3</sub>CN at 80 °C. The crude product was purified by flash column chromatography on silica gel (PE/EA = 1/3 to pure EA, with 0.5% Et<sub>3</sub>N) to afford the title compound as a liquid (21.0 mg, 49%). Mp 128–129 °C.

**<sup>1</sup>H NMR (500.13 MHz, CDCl<sub>3</sub>)** δ 7.67 (dd, *J* = 7.5, 3.0 Hz, 2 H), 7.31 (t, *J* = 7.8 Hz, 1 H), 7.19 (t, *J* = 7.8 Hz, 1 H), 6.36 (s, 1 H), 4.15 (t, *J* = 5.8 Hz, 2 H), 4.08–3.92 (brs, 1 H), 3.28 (t, *J* = 5.8 Hz, 2 H); **<sup>13</sup>C NMR (125.76 MHz, CDCl<sub>3</sub>)** δ 157.1, 147.9, 131.5, 129.9, 123.4, 120.9, 118.8, 110.9, 106.0, 59.1, 31.8; **HRMS** calcd for C<sub>11</sub>H<sub>11</sub>N<sub>2</sub>OS [M+H]<sup>+</sup>: 219.0587. Found: 219.0586.

#### Thiazolo[3,2-*a*]benzimidazol-3-yl-(phenyl)methanol (3Aa)

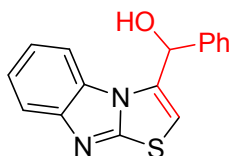

The reaction was performed following **GP-A** with CuI (4.0 mg, 0.02 mmol), 1,10-phen (**L-1**) (7.5 mg, 0.04 mmol), I<sub>2</sub> (50.7 mg, 0.20 mmol), K<sub>2</sub>CO<sub>3</sub> (56.2 mg, 0.41 mmol), 1-phenylprop-2-yn-1-ol (26.2 mg, 0.20 mmol), 2-mercaptobenzimidazole (39.4 mg, 0.26 mmol), and 1 mL of CH<sub>3</sub>CN at 80 °C. The crude product was purified by flash column chromatography on silica gel (PE/EA = 1/1) to afford the title compound as a liquid (26.6 mg, 48%).

**<sup>1</sup>H NMR (500.13 MHz, CDCl<sub>3</sub>)** δ 7.82 (d, *J* = 8.0 Hz, 1 H), 7.54 (d, *J* = 8.0 Hz, 1 H), 7.49 (d, *J* = 7.0 Hz, 2 H), 7.41–7.31 (m, 3 H), 7.23 (t, *J* = 8.0 Hz, 1 H), 7.11 (t, *J* = 7.5 Hz, 1 H), 6.18 (s, 1 H), 6.11 (s, 1 H); **<sup>13</sup>C NMR (125.76 MHz, CDCl<sub>3</sub>)** δ 157.2, 147.6, 139.2, 136.0, 129.7, 128.8, 128.7, 126.8, 123.4, 121.0, 118.3, 113.0, 108.9, 69.4; **HRMS** calcd for C<sub>16</sub>H<sub>13</sub>N<sub>2</sub>OS [M+H]<sup>+</sup>: 281.0743. Found: 281.0741.

#### Thiazolo[3,2-*a*]benzimidazol-3-yl-propan-2-ol (3Ba)



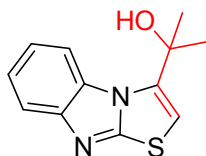

The reaction was performed following **GP-A** with CuI (3.8 mg, 0.02 mmol), 1,10-phen (7.4 mg, 0.04 mmol), I<sub>2</sub> (51.4 mg, 0.20 mmol), K<sub>2</sub>CO<sub>3</sub> (55.4 mg, 0.40 mmol), 2-methyl-3-butyn-2-ol (19.4  $\mu$ L, d = 0.868 g/mL, 16.8 mg 0.20 mmol), 2-mercaptobenzimidazole (38.6 mg, 0.26 mmol), and 1 mL of CH<sub>3</sub>CN at 80 °C. The crude product was purified by flash column chromatography on silica gel (PE/EA = 2/1) to afford the title compound as a white solid (25.2 mg, 54%). Mp 150–151 °C. **<sup>1</sup>H NMR (500.13 MHz, CDCl<sub>3</sub>)**  $\delta$  8.32 (d, *J* = 8.5 Hz, 1 H), 7.52 (d, *J* = 7.5 Hz, 1 H), 7.22 (t, *J* = 7.5 Hz, 1 H), 7.14 (t, *J* = 7.8 Hz, 1 H), 6.18 (s, 1 H), 4.46–3.66 (brs, 1 H), 1.67 (s, 6 H); **<sup>13</sup>C NMR (125.76 MHz, CDCl<sub>3</sub>)**  $\delta$  157.6, 148.0, 140.6, 130.3, 123.3, 120.8, 118.2, 115.9, 104.4, 69.1, 28.7; **HRMS** calcd for C<sub>12</sub>H<sub>13</sub>N<sub>2</sub>OS [M+H]<sup>+</sup>: 233.0743. Found: 233.0735.

#### Thiazolo[3,2-*a*]benzimidazol-3-yl-hexan-1-ol (3Ca)

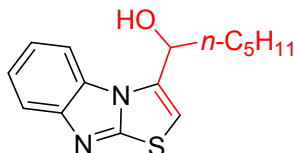

The reaction was performed following **GP-A** with CuI (4.0 mg, 0.02 mmol), 1,10-phen (**L-1**) (7.4 mg, 0.04 mmol), I<sub>2</sub> (51.0 mg, 0.20 mmol), K<sub>2</sub>CO<sub>3</sub> (55.2 mg, 0.40 mmol), 1-octyn-3-ol (25.8 mg, 0.20 mmol), 2-mercaptobenzimidazole (39.4 mg, 0.26 mmol), and 1 mL of CH<sub>3</sub>CN at 80 °C. The crude product was purified by flash column chromatography on silica gel (PE/EA = 2/1) to afford the title compound as a colourless liquid (30.9 mg, 55%).

**<sup>1</sup>H NMR (500.13 MHz, CDCl<sub>3</sub>)**  $\delta$  7.91 (d, *J* = 8.0 Hz, 1 H), 7.63 (d, *J* = 7.0 Hz, 1 H), 7.30 (t, *J* = 7.3 Hz, 1 H), 7.20 (t, *J* = 7.8 Hz, 1 H), 6.38 (s, 1 H), 5.00 (t, *J* = 6.3 Hz, 1 H), 4.64–3.99 (brs, 1 H), 1.98–1.86 (m, 2 H), 1.67–1.55 (m, 1 H), 1.51–1.40 (m, 1 H), 1.37–1.27 (m, 4 H), 0.89 (t, *J* = 6.8 Hz, 3 H); **<sup>13</sup>C NMR (125.76 MHz, CDCl<sub>3</sub>)**  $\delta$  157.2, 147.6, 137.1, 129.7, 123.5, 121.1, 118.4, 113.2, 105.5, 67.6, 34.9, 31.5, 25.4, 22.5, 13.9; **HRMS** calcd for C<sub>15</sub>H<sub>19</sub>N<sub>2</sub>OS [M+H]<sup>+</sup>: 275.1213. Found: 275.1219.

#### Thiazolo[3,2-*a*]benzimidazol-3-yl-cyclohexan-1-ol (3Da)

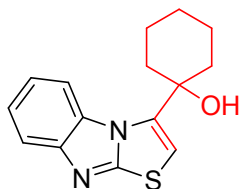

The reaction was performed following slightly modified **GP-A** with CuI (3.8 mg, 0.02 mmol), 1,10-phen (**L-1**) (7.0 mg, 0.04 mmol), I<sub>2</sub> (50.4 mg, 0.20 mmol), K<sub>2</sub>CO<sub>3</sub> (55.6 mg, 0.40 mmol), 1-ethynylcyclohexanol (99.6 mg, 0.80 mmol), 2-mercaptobenzimidazole (29.6 mg, 0.20 mmol), and 1 mL of CH<sub>3</sub>CN at 80 °C. The crude product was purified by flash column chromatography on silica gel (PE/EA =

2/1, with 0.5% Et<sub>3</sub>N) to afford the title compound as a white solid (33.3 mg, 62%). Mp 240–241 °C.

**<sup>1</sup>H NMR (500.13 MHz, DMSO-*d*<sub>6</sub>)** δ 8.42 (d, *J* = 8.5 Hz, 1 H), 7.65 (d, *J* = 8.0 Hz, 1 H), 7.32 (t, *J* = 7.8 Hz, 1 H), 7.24 (t, *J* = 7.5 Hz, 1 H), 7.02 (s, 1 H), 5.66 (s, 1 H), 2.20–2.11 (m, 2 H), 1.90–1.79 (m, 2 H), 1.78–1.65 (m, 3 H), 1.63–1.54 (m, 2 H), 1.35–1.25 (m, 1 H); **<sup>13</sup>C NMR (125.76 MHz, DMSO-*d*<sub>6</sub>)** δ 156.9, 147.9, 141.8, 130.3, 122.9, 120.2, 117.9, 116.0, 104.9, 68.8, 35.3, 25.1, 21.0; **HRMS** calcd for C<sub>15</sub>H<sub>17</sub>N<sub>2</sub>OS [M+H]<sup>+</sup>: 273.1062. Found: 273.1086.

**3-(4-Chlorophenyl)-6-methyl-thiazolo[3,2-*a*]benzimidazole (3ab) and 3-(4-Chlorophenyl)-7-methyl-thiazolo[3,2-*a*]benzimidazole (3ab')<sup>[6]</sup>**

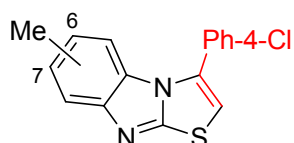

**3ab (6-Me) + 3ab' (7-Me)**

The reaction was performed following **GP-A** with CuI (3.9 mg, 0.02 mmol), 1,10-phen (**L-1**) (7.3 mg, 0.04 mmol), I<sub>2</sub> (51.4 mg, 0.20 mmol), K<sub>2</sub>CO<sub>3</sub> (56.1 mg, 0.41 mmol), 4-chlorophenylacetylene (27.1 mg, 0.20 mmol), 2-mercapto-5-methylbenzimidazole (43.3 mg, 0.26 mmol), and 1 mL of CH<sub>3</sub>CN at 80 °C. The crude product was purified by flash column chromatography on silica gel (PE/EA = 4/1) to afford the title compounds (inseparable mixture) as a yellow solid (32.9 mg, 56%, 1.1:1).

**<sup>1</sup>H NMR (500.13 MHz, CDCl<sub>3</sub>)** δ 7.60 (d, *J* = 8.0 Hz, 1 H), 7.55–7.44 (m, 9 H), 7.09 (d, *J* = 8.0 Hz, 1 H), 7.02 (d, *J* = 8.0 Hz, 1 H), 6.93 (s, 1 H), 6.84 (d, *J* = 8.0 Hz, 1 H), 6.52 (s, 1 H), 6.51 (s, 1 H), 2.40 (s, 3 H), 2.31 (s, 3 H); **<sup>13</sup>C NMR (125.76 MHz, CDCl<sub>3</sub>)** δ 156.9, 156.4, 148.7, 146.5, 136.3, 133.5, 133.0, 133.0, 130.6, 130.04, 130.00, 129.31, 129.27, 127.98, 127.95, 127.86, 127.81, 125.1, 122.1, 119.0, 118.8, 111.5, 111.0, 107.7, 107.5, 21.8, 21.6.

**3-(4-Chlorophenyl)-6-nitro-thiazolo[3,2-*a*]benzimidazole (3ac) and 3-(4-Chlorophenyl)-7-nitro-thiazolo[3,2-*a*]benzimidazole (3ac')**

The reaction was performed following slightly modified **GP-A** with CuI (3.9 mg, 0.02 mmol), 1,10-phen (**L-1**) (7.4 mg, 0.04 mmol), I<sub>2</sub> (52.0 mg, 0.20 mmol), K<sub>2</sub>CO<sub>3</sub> (55.7 mg, 0.40 mmol), 4-chlorophenylacetylene (27.9 mg, 0.20 mmol), 2-mercapto-5-nitrobenzimidazole (51.4 mg, 0.26 mmol), and 1 mL of CH<sub>3</sub>CN at 100 °C for 46 h. The crude product was purified by flash column chromatography on silica gel (PE/EA = 2/1 to 1/1, with 0.5% Et<sub>3</sub>N) to afford the title compounds **3ac** and **3ac'** (38.8 mg, 58%, 1.1:1).

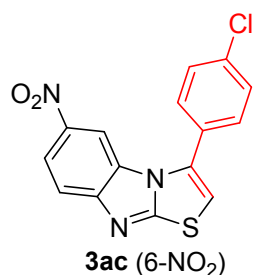

Yellow solid (18.8 mg, 28%). Mp 272–273 °C.

**<sup>1</sup>H NMR (500.13 MHz, CDCl<sub>3</sub>)** δ 8.28 (d, *J* = 9.5 Hz, 1 H), 8.23 (s, 1 H), 7.83 (d, *J* = 9.0 Hz, 1 H), 7.66–7.59 (m, 4 H), 6.79 (s, 1 H); **<sup>13</sup>C NMR (125.76 MHz, CDCl<sub>3</sub>)** δ 161.9, 152.8, 141.3, 137.3, 133.4, 129.9, 129.8, 128.7, 126.6, 119.5, 119.1, 109.5, 108.3; **HRMS** calcd for C<sub>15</sub>H<sub>9</sub>ClN<sub>3</sub>O<sub>2</sub>S [M+H]<sup>+</sup>: 330.0099. Found: 330.0105.

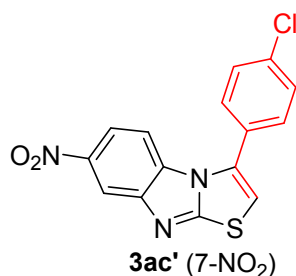

Yellow solid (20.0 mg, 30%), Mp 234–237 °C.

**<sup>1</sup>H NMR (500.13 MHz, CDCl<sub>3</sub>)** δ 8.62 (d, *J* = 1.0 Hz, 1 H), 7.96 (dd, *J* = 9.0, 1.5 Hz, 1 H), 7.58–7.49 (m, 4 H), 7.21 (d, *J* = 9.5 Hz, 1 H), 6.73 (s, 1 H); **<sup>13</sup>C NMR (125.76 MHz, CDCl<sub>3</sub>)** δ 160.2, 148.0, 144.3, 137.0, 133.4, 132.8, 130.1, 129.7, 126.9, 116.0, 115.7, 111.3, 109.9; **HRMS** calcd for C<sub>15</sub>H<sub>9</sub>ClN<sub>3</sub>O<sub>2</sub>S [M+H]<sup>+</sup>: 330.0099. Found: 330.0107.

### 3-(4-Chlorophenyl)-6-methoxy-thiazolo [3,2-*a*] benzimidazole (**3ad**) and 3-(4-Chlorophenyl)-7-methoxy-thiazolo[3,2-*a*]benzimidazole (**3ad'**)

The reaction was performed following slightly modified **GP-A** with CuI (7.9 mg, 0.04 mmol), 1,10-phen (**L-1**) (14.4 mg, 0.08 mmol), I<sub>2</sub> (52.0 mg, 0.20 mmol), K<sub>2</sub>CO<sub>3</sub> (55.8 mg, 0.40 mmol), 4-chlorophenylacetylene (27.6 mg, 0.20 mmol), 2-mercapto-5-methoxybenzimidazole (46.5 mg, 0.26 mmol), and 1 mL of CH<sub>3</sub>CN at 80 °C for 26 h. The crude product was purified by flash column chromatography on silica gel (PE/EA = 2/1, with 0.5% Et<sub>3</sub>N) to afford the title compounds **3ad** and **3ad'** (41.0 mg, 64%, 1.3:1).

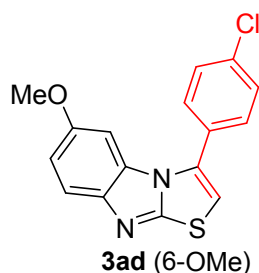

Yellow solid (18.1 mg, 28%). Mp 212–213 °C.

**<sup>1</sup>H NMR (500.13 MHz, CDCl<sub>3</sub>)** δ 7.69 (d, *J* = 8.5 Hz, 1 H), 7.59 (d, *J* = 8.5 Hz, 2 H),

7.55 (d,  $J = 8.5$  Hz, 2 H), 6.98 (d,  $J = 8.5$  Hz, 1 H), 6.70 (s, 1 H), 6.59 (s, 1 H), 3.71 (s, 3 H);  $^{13}\text{C}$  NMR (125.76 MHz,  $\text{CDCl}_3$ )  $\delta$  154.6, 136.4, 132.7, 130.1, 130.0, 129.4, 129.2, 127.8, 119.6, 112.0, 107.9, 96.5, 55.9; HRMS calcd for  $\text{C}_{16}\text{H}_{12}\text{ClN}_2\text{OS}$   $[\text{M}+\text{H}]^+$ : 315.0353. Found: 315.0350.

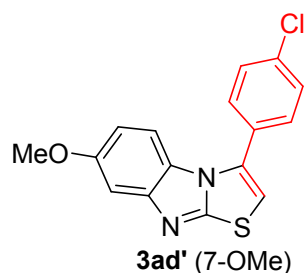

Yellow solid (22.9 mg, 36%). Mp 213–214 °C.

$^1\text{H}$  NMR (500.13 MHz,  $\text{CDCl}_3$ )  $\delta$  7.58 (d,  $J = 8.0$  Hz, 2 H), 7.54 (d,  $J = 8.0$  Hz, 2 H), 7.40–7.27 (m, 1 H), 7.25–7.14 (m, 1 H), 6.71 (d,  $J = 9.0$  Hz, 1 H), 6.57 (s, 1 H), 3.71 (s, 3 H);  $^{13}\text{C}$  NMR (125.76 MHz,  $\text{CDCl}_3$ )  $\delta$  156.7, 136.3, 133.1, 130.1, 130.0, 129.3, 129.2, 127.9, 112.1, 110.5, 107.2, 101.7, 55.7; HRMS calcd for  $\text{C}_{16}\text{H}_{12}\text{ClN}_2\text{OS}$   $[\text{M}+\text{H}]^+$ : 315.0353. Found: 315.0356.

### 3-(4-Chlorophenyl)-6-methyl-thiazolo[3,2-a]benzimidazole (**3jb**) and 3-(4-Chlorophenyl)-7-methyl-thiazolo[3,2-a]benzimidazole (**3jb'**)<sup>[6]</sup>

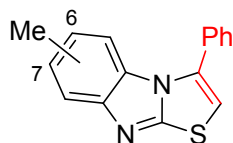

**3jb** (6-Me) + **3jb'** (7-Me)

The reaction was performed following **GP-A** with CuI (3.7 mg, 0.02 mmol), 1,10-phen (L-1) (7.4 mg, 0.04 mmol),  $\text{I}_2$  (51.2 mg, 0.20 mmol),  $\text{K}_2\text{CO}_3$  (56.2 mg, 0.41 mmol), phenylacetylene (21.9  $\mu\text{L}$ ,  $d = 0.93$  g/mL, 20.4 mg, 0.20 mmol), 2-mercapto-5-methylbenzimidazole (43.2 mg, 0.26 mmol), and 1 mL of  $\text{CH}_3\text{CN}$  at 80 °C. The crude product was purified by flash column chromatography on silica gel (PE/EA = 5/1 to 3/1) to afford the title compounds (inseparable mixture) as a white solid (28.8 mg, 54%, 1.2:1).

$^1\text{H}$  NMR (500.13 MHz,  $\text{CDCl}_3$ )  $\delta$  7.69–7.61 (m, 5 H), 7.60–7.52 (m, 7 H), 7.14 (d,  $J = 8.5$  Hz, 1 H), 7.10 (d,  $J = 8.5$  Hz, 1 H), 7.00 (s, 1 H), 6.88 (d,  $J = 8.0$  Hz, 1 H), 6.554 (s, 1 H), 6.549 (s, 1 H), 2.47 (s, 3 H), 2.36 (s, 3 H);  $^{13}\text{C}$  NMR (125.76 MHz,  $\text{CDCl}_3$ )  $\delta$  = 157.1, 156.6, 149.1, 146.9, 134.2, 134.1, 133.1, 130.2, 130.04, 130.00, 129.54, 129.52, 128.91, 128.88, 128.8, 128.7, 128.2, 124.8, 121.8, 119.0, 118.7, 111.6, 111.1, 106.9, 106.7, 21.7, 21.6.

### 3-Phenyl-6-methoxy-thiazolo[3,2-a]benzimidazole (**3jd**) and 3-phenyl-7-methoxy-thiazolo[3,2-a]benzimidazole (**3jd'**)

The reaction was performed following **GP-A** with CuI (3.8 mg, 0.02 mmol), 1,10-phen (L-1) (7.4 mg, 0.04 mmol),  $\text{I}_2$  (51.3 mg, 0.20 mmol),  $\text{K}_2\text{CO}_3$  (55.2 mg, 0.40 mmol), phenylacetylene (21.9  $\mu\text{L}$ ,  $d = 0.93$  g/mL, 20.4 mg, 0.20 mmol), 2-mercapto-

5-methoxybenzimidazole (47.0 mg, 0.26 mmol), and 1 mL of CH<sub>3</sub>CN at 80 °C. The crude product was purified by flash column chromatography on silica gel (PE/EA = 10/1 to 3/1) to afford the title compounds **3jd** and **3jd'** (29.6 mg, 53%, 1.5:1).

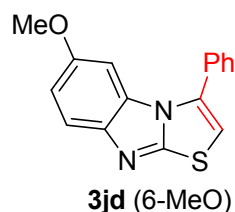

White solid (11.8 mg, 21%). Mp 109–110 °C.

**<sup>1</sup>H NMR (500.13 MHz, CDCl<sub>3</sub>)** δ 7.70-7.62 (m, 3 H), 7.60-7.54 (m, 3 H), 6.97 (dd, *J* = 8.8, 2.8 Hz, 1 H), 6.69 (d, *J* = 2.0 Hz, 1 H), 6.58 (s, 1 H), 3.67 (s, 3 H); **<sup>13</sup>C NMR (125.76 MHz, CDCl<sub>3</sub>)** δ 155.9, 154.5, 143.1, 133.9, 130.3, 130.2, 129.4, 128.94, 128.90, 119.5, 112.1, 107.2, 96.4, 55.8; **HRMS** calcd for C<sub>16</sub>H<sub>13</sub>N<sub>2</sub>OS [M+H]<sup>+</sup>: 281.0743. Found: 281.0740.

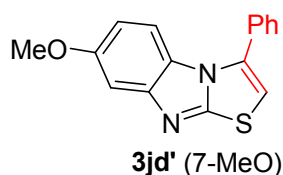

White solid (17.8 mg, 32%). Mp 137–139 °C.

**<sup>1</sup>H NMR (500.13 MHz, CDCl<sub>3</sub>)** δ 7.60-7.54 (m, 2 H), 7.53-7.46 (m, 3 H), 7.22-7.16 (m, 1 H), 7.05 (d, *J* = 9.0 Hz, 1 H), 6.63 (d, *J* = 9.0 Hz, 1 H), 6.51 (s, 1 H), 3.79 (s, 3 H); **<sup>13</sup>C NMR (125.76 MHz, CDCl<sub>3</sub>)** δ 157.3, 156.7, 149.8, 134.2, 130.1, 129.5, 129.0, 128.7, 124.8, 112.0, 110.1, 106.5, 101.5, 55.7; **HRMS** calcd for C<sub>16</sub>H<sub>13</sub>N<sub>2</sub>OS [M+H]<sup>+</sup>: 281.0743. Found: 281.0741.

## Gram-scale synthesis of **3aa**

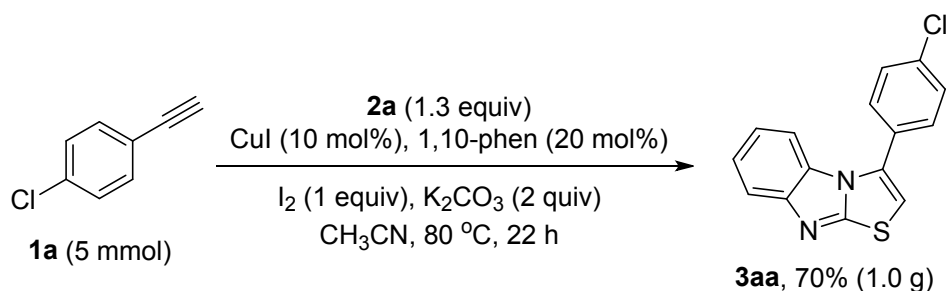

To a Schlenk tube (50 mL) were added I<sub>2</sub> (1.0 mmol), K<sub>2</sub>CO<sub>3</sub> (10.0 mmol), 2-mercaptobenzimidazole **2a** (6.5 mmol), CuI (0.5 mmol), 1,10-phen (**L-1**) (1.0 mmol), 4-chlorophenylacetylene **1a** (mg, 5 mmol), and 10 mL of CH<sub>3</sub>CN sequentially under air and then the resulting mixture was stirred at room temperature for 5 min. The tube was then sealed and the reaction mixture was stirred at 80 °C for 22 h. After cooling to room temperature, the mixture was filtered through Celite and the filtrate was concentrated. The crude mixture was purified by flash column chromatography on silica gel (PE/EA = 4/1, with 0.5% Et<sub>3</sub>N) to afford **3aa** as a white solid (1.0 g, 70%).

## Syntheses and characterization of 2-substituted thiazolo[3, 2-a]benzimidazoles (4)

### 2-(4-Chlorophenyl)thiazolo[3, 2-a]benzimidazole (4aa)

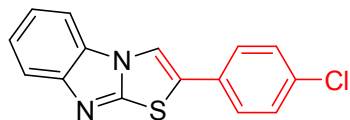

The reaction was performed following **GP-C** with CuI (9.3 mg, 0.05 mmol), 2,9-diisopropyl-1,10-phen (**L-2**) (16.0 mg, 0.06 mmol), I<sub>2</sub> (51.4 mg, 0.20 mmol), K<sub>2</sub>CO<sub>3</sub> (55.6 mg, 0.40 mmol), 4-chlorophenylacetylene (27.5 mg, 0.20 mmol), 2-mercaptobenzimidazole (39.2 mg, 0.26 mmol), and 1 mL of DMSO at 40 °C. The crude product was purified by flash column chromatography on silica gel (PE/EA = 3/1) to afford the title compound as a white solid (40.6 mg, 71%), along with **3aa** (8.2 mg, 14%). Mp 226–227 °C.

**<sup>1</sup>H NMR (500.13 MHz, CDCl<sub>3</sub>)** δ 7.92 (s, 1 H), 7.80 (d, *J* = 8.5 Hz, 1 H), 7.68 (d, *J* = 8.0 Hz, 1 H), 7.50 (d, *J* = 8.5 Hz, 2 H), 7.43 (d, *J* = 9.0 Hz, 2 H), 7.39 (t, *J* = 7.8 Hz, 1 H), 7.30 (t, *J* = 7.8 Hz, 1 H); **<sup>13</sup>C NMR (125.76 MHz, CDCl<sub>3</sub>)** δ 155.4, 147.0, 134.8, 129.6, 129.5, 128.6, 127.0, 123.9, 121.5, 119.2, 111.8, 110.3; **HRMS** calcd for C<sub>15</sub>H<sub>10</sub>ClN<sub>2</sub>S [M+H]<sup>+</sup>: 285.0248. Found: 285.0258.

### 2-(4-Bromophenyl)thiazolo[3, 2-a]benzimidazole (4ba)

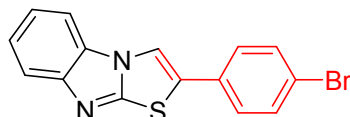

The reaction was performed following **GP-C** with CuI (9.7 mg, 0.05 mmol), 2,9-diisopropyl-1,10-phen (**L-2**) (16.2 mg, 0.06 mmol), I<sub>2</sub> (51.0 mg, 0.20 mmol), K<sub>2</sub>CO<sub>3</sub> (54.8 mg, 0.40 mmol), 4-bromophenylacetylene (35.9 mg, 0.20 mmol), 2-mercaptobenzimidazole (39.2 mg, 0.26 mmol), and 1 mL of DMSO at 40 °C. The crude product was purified by flash column chromatography on silica gel (PE/EA = 4/1) to afford the title compound as a white solid (38.5 mg, 59%), along with **3ba** (13.3 mg, 20%). Mp 223–224 °C.

**<sup>1</sup>H NMR (500.13 MHz, CDCl<sub>3</sub>)** δ 7.91 (s, 1 H), 7.79 (d, *J* = 8.0 Hz, 1 H), 7.67 (d, *J* = 8.0 Hz, 1 H), 7.49 (d, *J* = 7.0 Hz, 2 H), 7.42 (d, *J* = 7.5 Hz, 2 H), 7.38 (t, *J* = 7.5 Hz, 1 H), 7.29 (t, *J* = 7.3 Hz, 1 H); **<sup>13</sup>C NMR (125.76 MHz, CDCl<sub>3</sub>)** δ 155.4, 147.5, 132.4, 130.2, 129.6, 128.3, 127.2, 123.8, 122.8, 121.4, 119.4, 112.8, 110.2; **HRMS** calcd for C<sub>15</sub>H<sub>10</sub>BrN<sub>2</sub>S [M+H]<sup>+</sup>: 328.9743. Found: 328.9740.

### 2-(4-Cyanophenyl)thiazolo[3, 2-a]benzimidazole (4da)

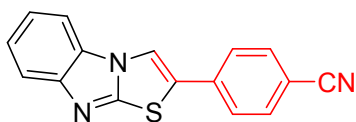

The reaction was performed following **GP-C** with CuI (9.8 mg, 0.05 mmol), 2,9-diisopropyl-1,10-phen (**L-2**) (16.0 mg, 0.06 mmol), I<sub>2</sub> (51.9 mg, 0.20 mmol), K<sub>2</sub>CO<sub>3</sub> (55.4 mg, 0.40 mmol), 4-cyanophenylacetylene (25.8 mg, 0.20 mmol), 2-mercaptobenzimidazole (39.3 mg, 0.26 mmol), and 1 mL of DMSO at 40 °C. The crude product was purified by flash column chromatography on silica gel (PE/EA = 2/1, with 0.5% Et<sub>3</sub>N) to afford the title compound as a yellow solid (39.5 mg, 71%), along with **3da** (3.5 mg, 6%). Mp 234–236 °C.

**<sup>1</sup>H NMR (500.13 MHz, CDCl<sub>3</sub>)** δ 8.04 (s, 1 H), 7.79 (d, *J* = 8.0 Hz, 1 H), 7.72 (d, *J* = 8.5 Hz, 1 H), 7.67 (d, *J* = 7.5 Hz, 2 H), 7.64 (d, *J* = 9.0 Hz, 2 H), 7.39 (t, *J* = 7.3 Hz, 1 H), 7.30 (t, *J* = 7.3 Hz, 1 H); **<sup>13</sup>C NMR (125.76 MHz, CDCl<sub>3</sub>)** δ 155.3, 147.7, 135.7, 133.0, 129.5, 127.2, 126.0, 124.2, 121.7, 119.5, 118.2, 114.6, 112.0, 110.3; **HRMS** calcd for C<sub>16</sub>H<sub>10</sub>N<sub>3</sub>S [M+H]<sup>+</sup>: 276.0590. Found: 276.0588.

#### 2-(3,5-bis(trifluoromethyl)phenyl)thiazolo[3, 2-a]benzimidazole (4ka)

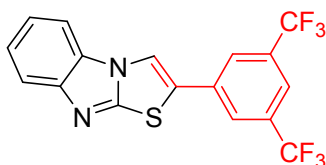

The reaction was performed following **GP-C** with CuI (9.6 mg, 0.05 mmol), 2,9-diisopropyl-1,10-phen (**L-2**) (16.2 mg, 0.06 mmol), I<sub>2</sub> (50.3 mg, 0.20 mmol), K<sub>2</sub>CO<sub>3</sub> (55.5 mg, 0.40 mmol), 3,5-bis(trifluoromethyl)phenylacetylene (47.3 mg, 0.20 mmol), 2-mercaptobenzimidazole (39.0 mg, 0.26 mmol), and 1 mL of DMSO at 40 °C. The crude product was purified by flash column chromatography on silica gel (PE/EA = 4/1) to afford the title compound as a yellow solid (57.1 mg, 74%), along with **3ka** (8.7 mg, 11%). Mp 223–226 °C.

**<sup>1</sup>H NMR (500.13 MHz, CDCl<sub>3</sub>)** δ 8.22 (s, 1 H), 8.02 (s, 2 H), 7.93 (s, 1 H), 7.87 (d, *J* = 8.0 Hz, 1 H), 7.80 (d, *J* = 8.0 Hz, 1 H), 7.52 (t, *J* = 7.8 Hz, 2 H), 7.44 (t, *J* = 7.5 Hz, 2 H); **<sup>13</sup>C NMR (125.76 MHz, CDCl<sub>3</sub>)** δ 155.0, 147.9, 133.6, 132.9 (q, *J* = 33.8 Hz), 129.6, 122.9 (q, *J* = 272.6 Hz), 125.9, 125.6, 125.5, 124.2, 122.1 (sep, *J* = 3.8 Hz), 121.8, 119.6, 114.8, 110.3; **HRMS** calcd for C<sub>17</sub>H<sub>9</sub>F<sub>6</sub>N<sub>2</sub>S [M+H]<sup>+</sup>: 387.0385. Found: 287.0394.

#### 2-(4-Methoxyphenyl)thiazolo[3, 2-a]benzimidazole (4ga)

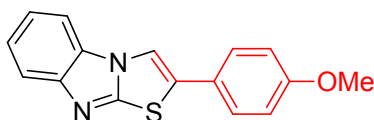

The reaction was performed following **GP-C** with CuI (9.3 mg, 0.05 mmol), 2,9-diisopropyl-1,10-phen (**L-2**) (16.2 mg, 0.06 mmol), I<sub>2</sub> (51.5 mg, 0.20 mmol), K<sub>2</sub>CO<sub>3</sub> (56.2 mg, 0.41 mmol), 4-methoxyphenylacetylene (27.0 mg, 0.20 mmol), 2-mercaptobenzimidazole (39.0 mg, 0.26 mmol), and 1 mL of DMSO at 40 °C. The



crude product was purified by flash column chromatography on silica gel (PE/EA = 3/1) to afford the title compound as a white solid (13.6 mg, 71%), along with **3ga** (29.5 mg, 52%). Mp 152–155 °C.

**<sup>1</sup>H NMR (500.13 MHz, CDCl<sub>3</sub>)** δ 7.71 (d, *J* = 8.0 Hz, 1 H), 7.69 (s, 1 H), 7.57 (d, *J* = 8.0 Hz, 1 H), 7.41 (d, *J* = 9.0 Hz, 2 H), 7.28 (t, *J* = 7.8 Hz, 1 H), 7.19 (t, *J* = 7.5 Hz, 1 H), 8.89 (d, *J* = 9.0 Hz, 1 H), 3.78 (s, 3 H); **<sup>13</sup>C NMR (125.76 MHz, CDCl<sub>3</sub>)** δ 160.2, 155.7, 147.5, 129.7, 129.6, 127.3, 123.8, 123.4, 121.1, 119.2, 114.7, 111.2, 110.1, 55.4; **HRMS** calcd for C<sub>16</sub>H<sub>13</sub>N<sub>2</sub>OS [M+H]<sup>+</sup>: 281.0743. Found: 281.0741.

#### 2-(4-Propylphenyl)thiazolo[3, 2-a]benzimidazole (**4ha**)

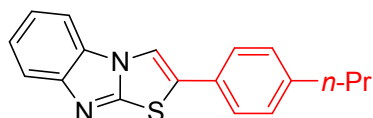

The reaction was performed following **GP-C** with CuI (9.5 mg, 0.05 mmol), 2,9-diisopropyl-1,10-phen (**L-2**) (15.8 mg, 0.06 mmol), I<sub>2</sub> (51.9 mg, 0.20 mmol), K<sub>2</sub>CO<sub>3</sub> (54.8 mg, 0.40 mmol), 4-propylphenylacetylene (28.4 mg, 0.20 mmol), 2-mercaptobenzimidazole (39.5 mg, 0.26 mmol), and 1 mL of DMSO at 40 °C. The crude product was purified by flash column chromatography on silica gel (PE/EA = 4/1) to afford the title compound as a white solid (25.3 mg, 44%), along with **3ha** (22.1 mg, 38%). Mp 134–136 °C.

**<sup>1</sup>H NMR (500.13 MHz, CDCl<sub>3</sub>)** δ 7.76 (s, 1 H), 7.71 (d, *J* = 8.5 Hz, 1 H), 7.57 (d, *J* = 7.5 Hz, 1 H), 7.38 (d, *J* = 8.0 Hz, 2 H), 7.28 (t, *J* = 7.5 Hz, 1 H), 7.22–7.13 (m, 3 H), 2.54 (t, *J* = 7.5 Hz, 2 H), 1.64–1.54 (m, 2 H), 0.88 (t, *J* = 7.3 Hz, 3 H); **<sup>13</sup>C NMR (125.76 MHz, CDCl<sub>3</sub>)** δ 155.6, 147.3, 143.8, 129.9, 129.6, 129.3, 128.5, 125.8, 123.5, 121.2, 119.2, 111.8, 110.2, 37.7, 24.3, 13.7; **HRMS** calcd for C<sub>18</sub>H<sub>17</sub>N<sub>2</sub>S [M+H]<sup>+</sup>: 293.1107. Found: 293.1107.

#### 2-Thiophen-2-ylthiazolo[3,2-a]benzimidazole (**4la**)

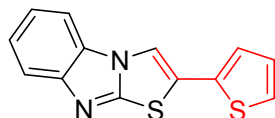

The reaction was performed following **GP-C** with CuI (9.5 mg, 0.05 mmol), 2,9-diisopropyl-1,10-phen (**L-2**) (15.9 mg, 0.06 mmol), I<sub>2</sub> (52.0 mg, 0.20 mmol), K<sub>2</sub>CO<sub>3</sub> (56.0 mg, 0.41 mmol), 2-ethynylthiophene (22.0 mg, 0.20 mmol), 2-mercaptobenzimidazole (39.2 mg, 0.26 mmol), and 1 mL of DMSO at 40 °C. The crude product was purified by flash column chromatography on silica gel (PE/EA = 4/1) to afford the title compound as a yellow solid (25.2 mg, 48%), along with **3la** (11.7 mg, 22%). Mp 147–150 °C.

**<sup>1</sup>H NMR (500.13 MHz, CDCl<sub>3</sub>)** δ 7.81–7.73 (m, 2 H), 7.63 (d, *J* = 8.5 Hz, 1 H), 7.36 (d, *J* = 7.3 Hz, 1 H), 7.32 (d, *J* = 5.0 Hz, 1 H), 7.27 (d, *J* = 7.5 Hz, 1 H), 7.20 (d, *J* = 3.0 Hz, 1 H), 7.07 (dd, *J* = 5.0, 3.5 Hz, 1 H); **<sup>13</sup>C NMR (125.76 MHz, CDCl<sub>3</sub>)** δ 155.2, 147.5, 133.1, 129.6, 128.0, 125.84, 125.80, 123.7, 123.0, 121.4, 119.3, 112.5, 110.2; **HRMS** calcd for C<sub>13</sub>H<sub>9</sub>N<sub>2</sub>S<sub>2</sub> [M+H]<sup>+</sup>: 257.0202. Found: 257.0210.

#### 2-Pyridin-2-ylthiazolo[3,2-a]benzimidazole (**4na**)



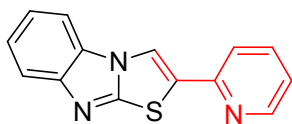

The reaction was performed following **GP-C** with CuI (9.8 mg, 0.05 mmol), 2,9-diisopropyl-1,10-phen (**L-2**) (16.0 mg, 0.06 mmol), I<sub>2</sub> (51.9 mg, 0.20 mmol), K<sub>2</sub>CO<sub>3</sub> (55.8 mg, 0.40 mmol), 2-ethynylpyridine **1n** (20.4 mg, 0.20 mmol), 2-mercaptobenzimidazole **2a** (39.4 mg, 0.26 mmol), and 1 mL of DMSO at 40 °C. The crude product was purified by flash column chromatography on silica gel (PE/EA = 1/1, with 0.5% Et<sub>3</sub>N) to afford the title compound as a yellow solid (39.8 mg, 80%), along with **3na** (2.6 mg, 5%). Mp 213–214 °C.

**<sup>1</sup>H NMR (500.13 MHz, CDCl<sub>3</sub>)** δ 8.50 (d, *J* = 5.0 Hz, 1 H), 8.13 (s, 1 H), 7.70 (d, *J* = 8.5 Hz, 1 H), 7.64 (td, *J* = 7.5, 1.0 Hz, 1 H), 7.57 (d, *J* = 8.0 Hz, 1 H), 7.51 (d, *J* = 8.0 Hz, 1 H), 7.29 (t, *J* = 7.5 Hz, 1 H), 7.19 (t, *J* = 7.8 Hz, 1 H), 7.13 (dd, *J* = 6.8, 5.3 Hz, 1 H); **<sup>13</sup>C NMR (125.76 MHz, CDCl<sub>3</sub>)** δ 156.5, 149.9, 149.7, 147.8, 136.7, 130.7, 129.6, 123.8, 122.8, 121.3, 119.3, 118.7, 114.5, 110.2; **HRMS** calcd for C<sub>14</sub>H<sub>10</sub>N<sub>3</sub>S [M+H]<sup>+</sup>: 252.0950. Found: 252.0953.

#### 2-Pyridin-4-ylthiazolo[3,2-a]benzimidazole (4oa)

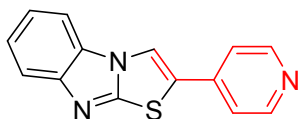

The reaction was performed following **GP-C** with CuI (9.6 mg, 0.05 mmol), 2,9-diisopropyl-1,10-phen (**L-2**) (16.2 mg, 0.06 mmol), I<sub>2</sub> (50.7 mg, 0.20 mmol), K<sub>2</sub>CO<sub>3</sub> (54.6 mg, 0.40 mmol), 4-ethynylpyridine (20.5 mg, 0.20 mmol), 2-mercaptobenzimidazole (39.1 mg, 0.26 mmol), and 1 mL of DMSO at 40 °C. The crude product was purified by flash column chromatography on silica gel (PE/EA = 1/2, with 0.5% Et<sub>3</sub>N) to afford the title compound as a yellow solid (41.9 mg, 84%), along with **3oa** (3.8 mg, impure, <8%). Mp 188–190 °C.

**<sup>1</sup>H NMR (500.13 MHz, CDCl<sub>3</sub>)** δ 8.73–8.57 (m, 2 H), 8.12 (s, 1 H), 7.79 (d, *J* = 8.0 Hz, 1 H), 7.67 (d, *J* = 7.5 Hz, 1 H), 7.47–7.35 (m, 3 H), 7.29 (t, *J* = 7.8 Hz, 1 H); **<sup>13</sup>C NMR (125.76 MHz, CDCl<sub>3</sub>)** δ 155.3, 150.6, 147.9, 138.7, 129.5, 126.3, 124.2, 121.6, 119.6, 115.0, 110.3; **HRMS** calcd for C<sub>14</sub>H<sub>10</sub>N<sub>3</sub>S [M+H]<sup>+</sup>: 252.0590. Found: 252.0599; **HRMS** calcd for C<sub>14</sub>H<sub>10</sub>N<sub>3</sub>S [M+H]<sup>+</sup>: 252.0950. Found: 252.0951.

#### 2-(Triethylsilyl)thiazolo[3,2-a]benzimidazole (4qa)

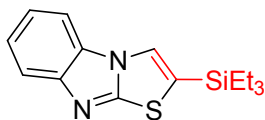

The reaction was performed following slightly modified **GP-C** with CuI (9.5 mg, 0.05 mmol), 2,9-diisopropyl-1,10-phen (**L-2**) (15.6 mg, 0.06 mmol), I<sub>2</sub> (51.1 mg, 0.20 mmol), K<sub>2</sub>CO<sub>3</sub> (54.9 mg, 0.40 mmol), 2-mercaptobenzimidazole (38.4 mg, 0.26 mmol), (triethylsilyl)acetylene (27.9 mg, 0.20 mmol), and 1 mL of DMSO at 40 °C. The crude product was purified by flash column chromatography on silica gel (PE/EA = 5/1) to afford the title compound as a colourless liquid (40.9 mg, 71%) (Regioisomer **3qa** was not observed.)

**<sup>1</sup>H NMR (500.13 MHz, CDCl<sub>3</sub>)** δ 7.77 (d, *J* = 8.0 Hz, 1 H), 7.66 (d, *J* = 7.5 Hz, 1 H), 7.60 (s, 1 H), 7.35 (d, *J* = 7.5 Hz, 1 H), 7.24 (t, *J* = 7.8 Hz, 1 H), 1.04 (t, *J* = 8.0 Hz, 1 H), 0.86 (q, *J* = 7.8 Hz, 1 H); **<sup>13</sup>C NMR (125.76 MHz, CDCl<sub>3</sub>)** δ 160.1, 148.9, 129.1, 123.6, 121.8, 120.7, 119.1, 110.3, 7.1, 3.7; **HRMS** calcd for C<sub>15</sub>H<sub>21</sub>N<sub>2</sub>SSi [M+H]<sup>+</sup>: 289.1190. Found: 289.1195.

#### 2-Butylthiazolo[3,2-a]benzimidazole (4ua)<sup>[5]</sup>

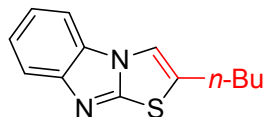

The reaction was performed following **GP-C** with CuI (9.6 mg, 0.05 mmol), 2,9-diisopropyl-1,10-phen (**L-2**) (16.1 mg, 0.06 mmol), I<sub>2</sub> (52.0 mg, 0.20 mmol), K<sub>2</sub>CO<sub>3</sub> (55.7 mg, 0.40 mmol), 2-mercaptobenzimidazole (39.0 mg, 0.26 mmol), hex-1-yne (22.5 μL, d = 0.715 g/mL, 16.1 mg, 0.20 mmol), and 1 mL of DMSO at 40 °C. The crude product was purified by flash column chromatography on silica gel (PE/EA = 4/1) to afford the title compound as a white solid (19.1 mg, 42%), along with **3ua** (5.1 mg, 11%). Mp 93–94 °C.

**<sup>1</sup>H NMR (500.13 MHz, CDCl<sub>3</sub>)** δ 7.76 (d, *J* = 8.0 Hz, 1 H), 7.58 (d, *J* = 8.0 Hz, 1 H), 7.39 (s, 1 H), 7.33 (t, *J* = 7.8 Hz, 1 H), 7.23 (t, *J* = 7.8 Hz, 1 H), 2.78 (t, *J* = 7.3 Hz, 2 H), 1.75–1.65 (m, 2 H), 1.49–1.39 (m, 2 H), 0.97 (t, *J* = 7.5 Hz, 3 H); **<sup>13</sup>C NMR (125.76 MHz, CDCl<sub>3</sub>)** δ 156.3, 147.2, 130.8, 129.5, 123.1, 120.8, 119.0, 113.0, 110.0, 32.2, 28.5, 22.0, 13.6.

#### 2-Phenoxymethylthiazolo[3,2-a]benzimidazole (4xa)

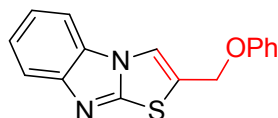

The reaction was performed following **GP-C** with CuI (9.5 mg, 0.05 mmol), 2,9-diisopropyl-1,10-phen (**L-2**) (16.4 mg, 0.06 mmol), I<sub>2</sub> (51.5 mg, 0.20 mmol), K<sub>2</sub>CO<sub>3</sub> (54.6 mg, 0.40 mmol), 2-mercaptobenzimidazole (38.5 mg, 0.26 mmol), phenyl propargyl ether (27.1 mg, 0.20 mmol), and 1 mL of DMSO at 40 °C. The crude product was purified by flash column chromatography on silica gel (PE/EA = 1/1) to afford the title compound as a white solid (32.9 mg, 57%), along with **3xa** (3.0 mg, 5%). Mp 184–185 °C.

**<sup>1</sup>H NMR (500.13 MHz, CDCl<sub>3</sub>)** δ 7.71 (d, *J* = 8.0 Hz, 1 H), 7.64 (s, 1 H), 7.54 (d, *J* = 8.0 Hz, 1 H), 7.32–7.22 (m, 3 H), 7.19 (t, *J* = 7.5 Hz, 1 H), 6.99–6.89 (m, 3 H), 5.10 (s, 2 H); **<sup>13</sup>C NMR (125.76 MHz, CDCl<sub>3</sub>)** δ 157.7, 156.5, 129.7, 125.0, 123.7, 122.1, 121.2, 119.3, 116.0, 115.1, 110.1, 63.9; **HRMS** calcd for C<sub>16</sub>H<sub>13</sub>N<sub>2</sub>OS [M+H]<sup>+</sup>: 281.0743. Found: 281.0744.

#### 2-Phenylthiomethylthiazolo[3,2-a]benzimidazole (4ya)

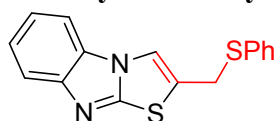

The reaction was performed following **GP-C** with CuI (9.5 mg, 0.05 mmol), 2,9-diisopropyl-1,10-phen (**L-2**) (15.5 mg, 0.06 mmol), I<sub>2</sub> (51.3 mg, 0.20 mmol), K<sub>2</sub>CO<sub>3</sub>

(56.1 mg, 0.41 mmol), 2-mercaptobenzimidazole (38.9 mg, 0.26 mmol), phenyl propargyl sulfide (29.2 mg, 0.20 mmol), and 1 mL of DMSO at 40 °C. The crude product was purified by flash column chromatography on silica gel (PE/EA = 4/1) to afford the title compound as a white solid (39.5 mg, 68%), along with **3ya** (4.4 mg, 7%). Mp 148–149 °C.

**<sup>1</sup>H NMR (500.13 MHz, CDCl<sub>3</sub>)** δ 7.67 (d, *J* = 8.0 Hz, 1 H), 7.43 (d, *J* = 8.5 Hz, 1 H), 7.36–7.28 (m, 3 H), 7.25 (t, *J* = 7.5 Hz, 1 H), 7.23–7.16 (m, 3 H), 7.14 (t, *J* = 7.8 Hz, 1 H), 4.10 (s, 2 H); **<sup>13</sup>C NMR (125.76 MHz, CDCl<sub>3</sub>)** δ 156.1, 147.1, 133.8, 131.5, 129.3, 129.2, 127.8, 127.3, 123.5, 121.1, 119.1, 115.0, 110.1, 33.4; **HRMS** calcd for C<sub>16</sub>H<sub>13</sub>N<sub>2</sub>S<sub>2</sub> [M+H]<sup>+</sup>: 297.0515. Found: 297.0520.

### Gram-scale synthesis of **4na**

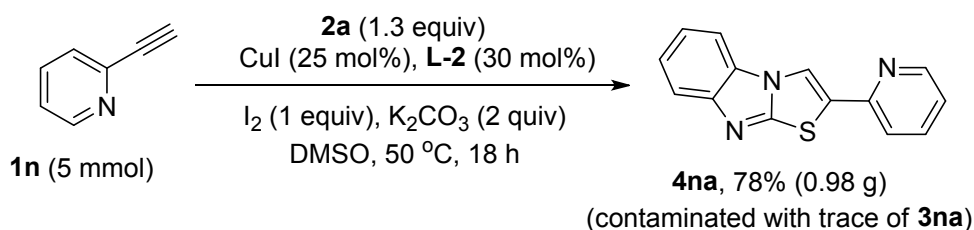

To a 100 mL round-bottomed flask were added 2-mercaptobenzimidazole **2a** (978.0 mg, 6.51 mmol), I<sub>2</sub> (1.2672 g, 4.99 mmol), K<sub>2</sub>CO<sub>3</sub> (1.3811 g, 10.06 mmol), CuI (238.7 mg, 1.25 mmol), 2,9-diisopropyl-1,10-phenanthroline (**L-2**) (398.0 mg, 1.51 mmol), 2-ethynylpyridine **1n** (515.6 mg, 5.00 mmol), and 25 mL of DMSO sequentially under air and then the resulting mixture was stirred at room temperature for 5 minutes. The flask was then sealed with a rubber stopper and the reaction mixture was stirred at 50 °C for 18 h. After cooling to room temperature, the reaction mixture was diluted with EA (120 mL), washed with water (50 mL) and brine (2 x 50 mL), dried over anhydrous Na<sub>2</sub>SO<sub>4</sub>. Filtration, concentration, and purification by flash column chromatography on silica gel (PE/EA = 2/1, with 0.5% Et<sub>3</sub>N) afforded the desired product as a yellow solid (0.975 g, 78%, contaminated with trace of **3na**).

### References

- [1] M. M. Bassaco, M. P. Fortes, D. F. Back, T. S. Kaufman, C. C. Silveira, *RSC Adv.* **2014**, *4*, 60785–60797.
- [2] a) C. Metallinos, F. B. Barrett, Y. Wang, S. Xua, N. J. Taylor, *Tetrahedron* **2006**, *62*, 11145–11157; b) T. Wang, F. Chen, J. Qin, Y.-M. He, Q.-H. Fan, *Angew. Chem. Int. Ed.* **2013**, *52*, 7172–7176; c) J. Li, W. Yan, Y. Kishi, *J. Am. Chem. Soc.* **2015**, *137*, 6226–6231.
- [3] I. Cikotiene, *Eur. J. Org. Chem.* **2012**, 2766–2773.
- [4] a) H. Xu, Y. Zhang, J. Huang, W. Chen, *Org. Lett.* **2010**, *12*, 3704–3707; b) S. Singh, H. Singh, M. Singh, K. S. Narang, *Ind. J. Chem.* **1970**, *8*, 230.
- [5] D. Xiao, L. Han, Q. Sun, Q. Chen, N. Gong, Y. Lv, F. Suzenet, G. Guillaumet, T. Cheng, R. Li, *RSC Adv.* **2012**, *2*, 5054–5057.

- [6] G. Shen, B. Yang, X. Huang, Y. Hou, H. Gao, J. Cui, C. Cui, T. Zhang, *J. Org. Chem.* **2017**, *82*, 3798–3805.
- [7] C. Roussel, F. Andreoli, M. Roman, M. Hristova, N. Vanthuyne, *Molecules* **2005**, *10*, 327–333.

### 3-(4-Chlorophenyl)thiazolo[3,2-a]benzimidazole (3aa)

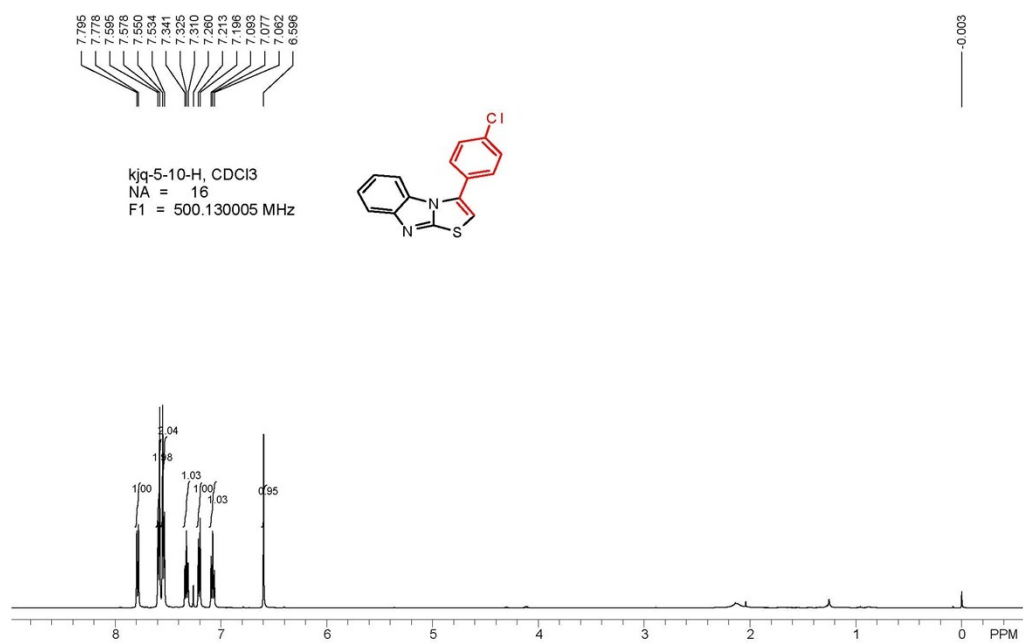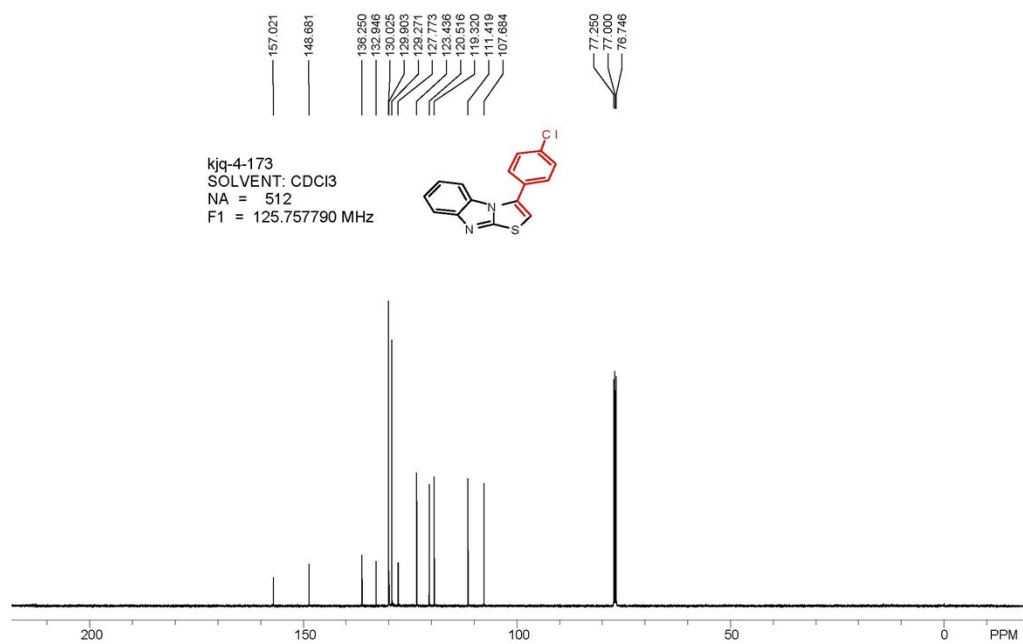

### 3-(4-Bromophenyl)thiazolo[3,2-a]benzimidazole (3ba)

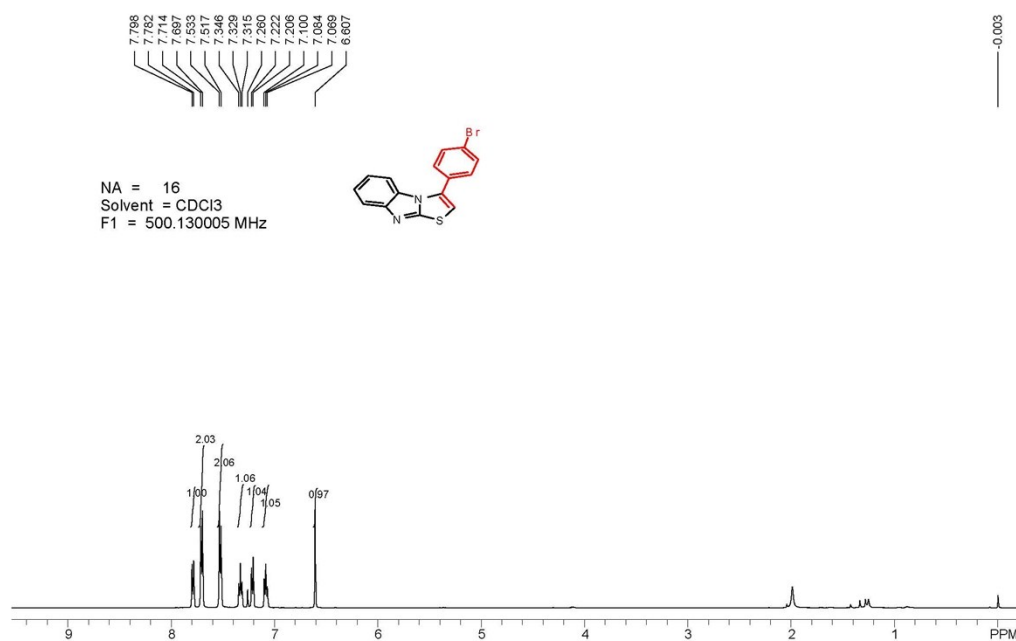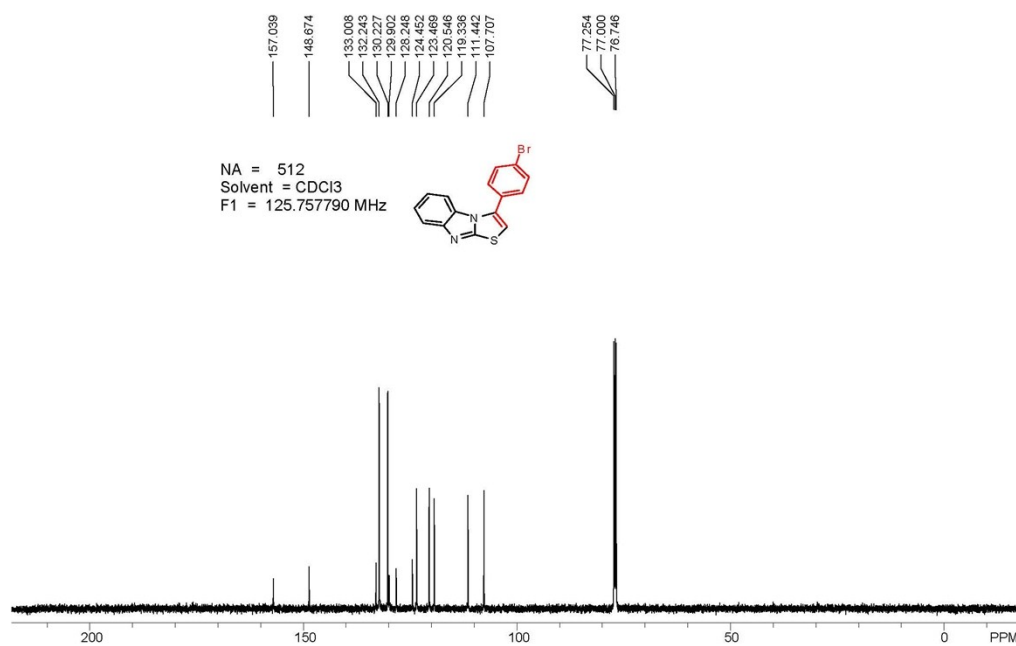

### 3-(4-Fluorophenyl)thiazolo[3,2-a]benzimidazole (3ca)

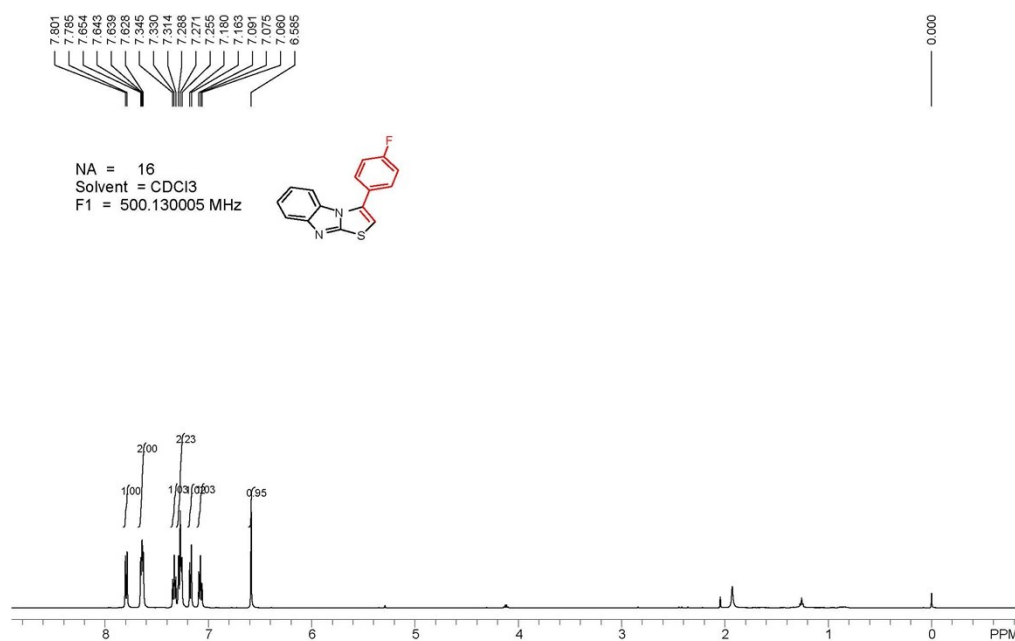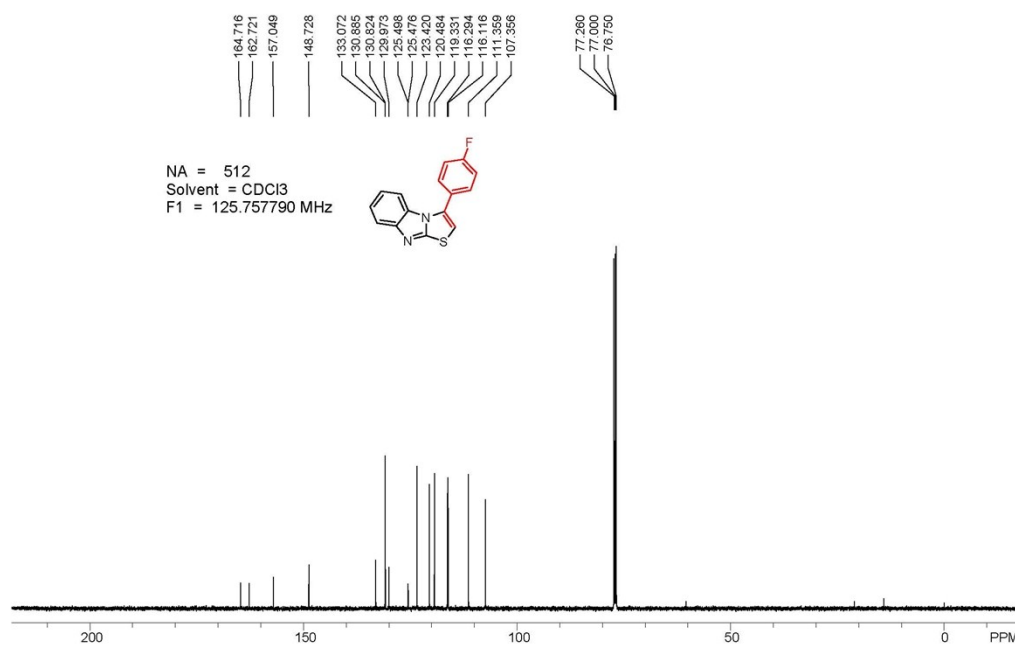

### 3-(4-Cyanophenyl)thiazolo[3,2-a]benzimidazole (3da)

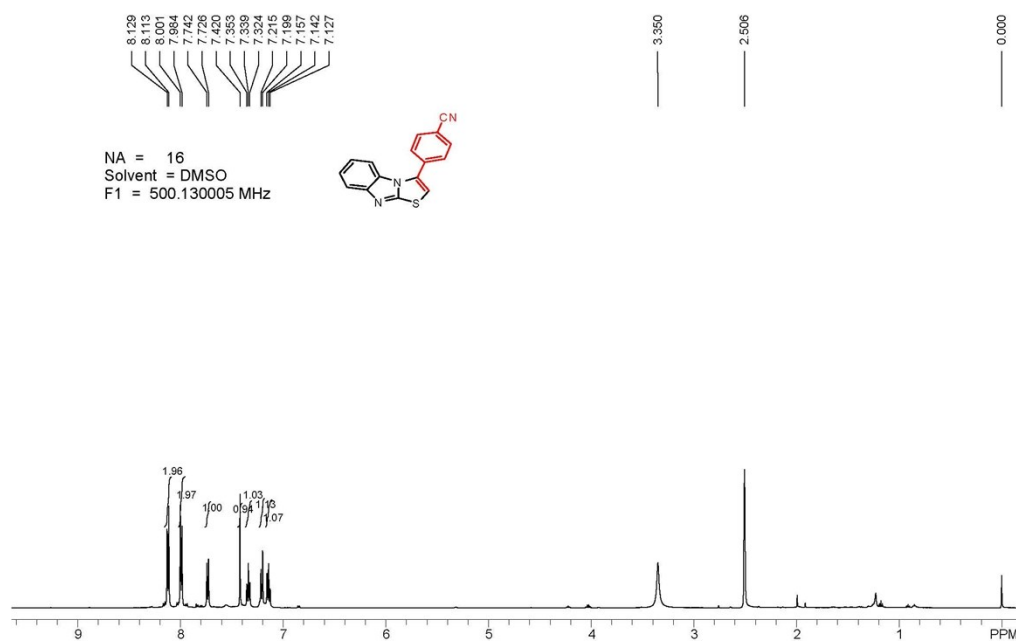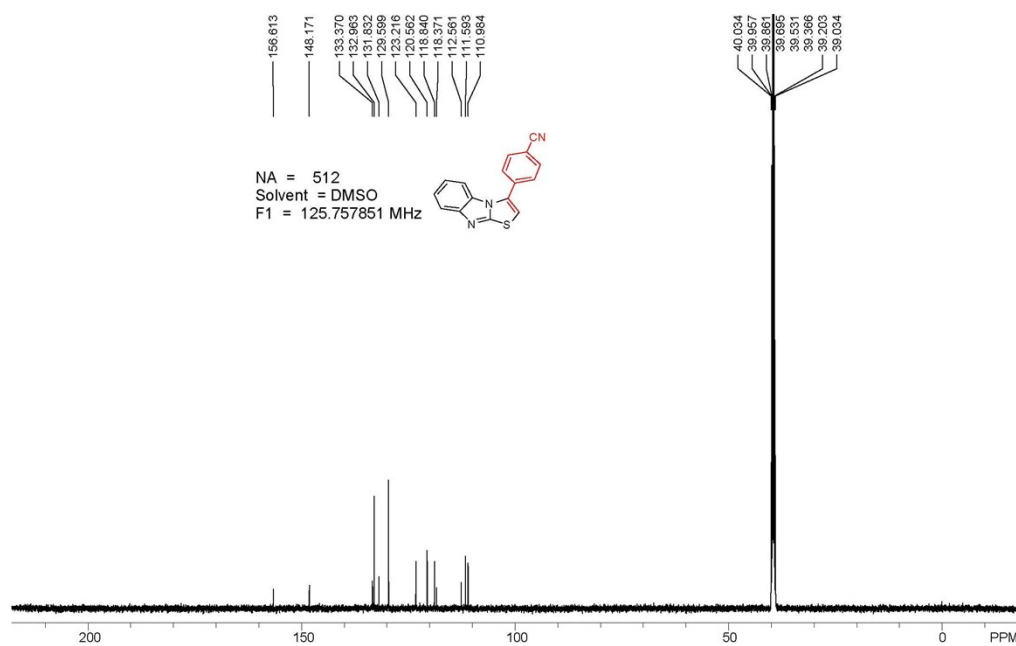



### 3-(4-Nitrophenyl)thiazolo[3,2-a]benzimidazole (3ea)

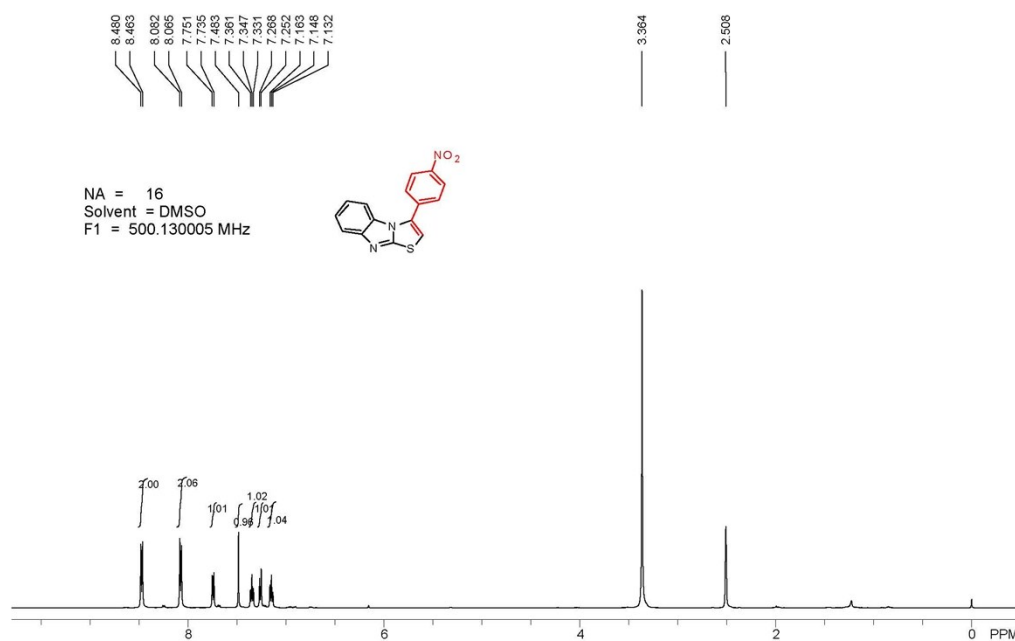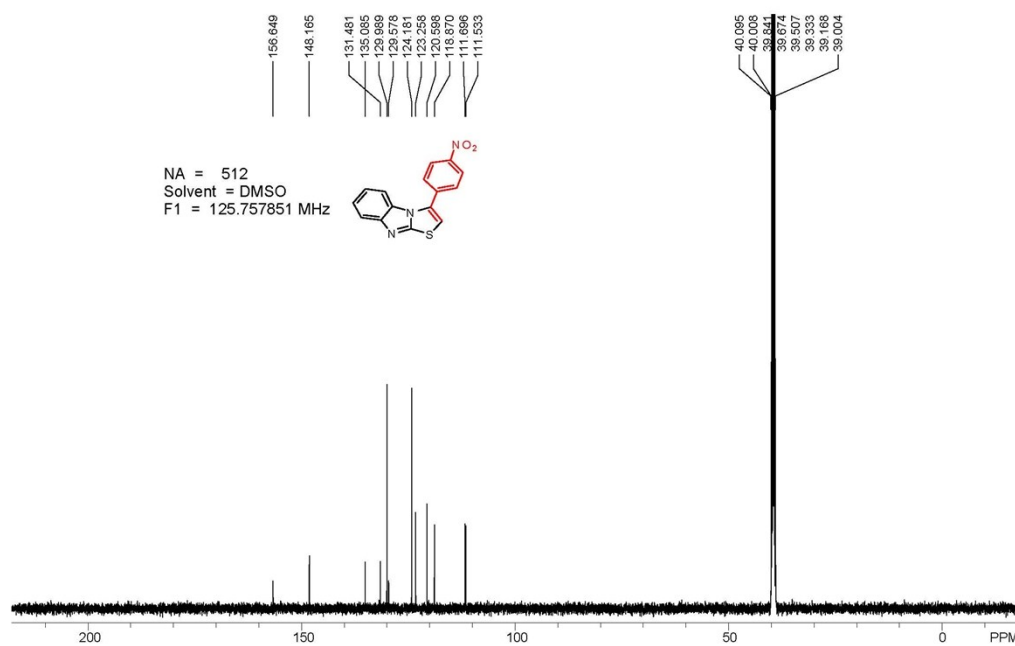

### 3-(4-Formylphenyl)thiazolo[3,2-a]benzimidazole (3fa)

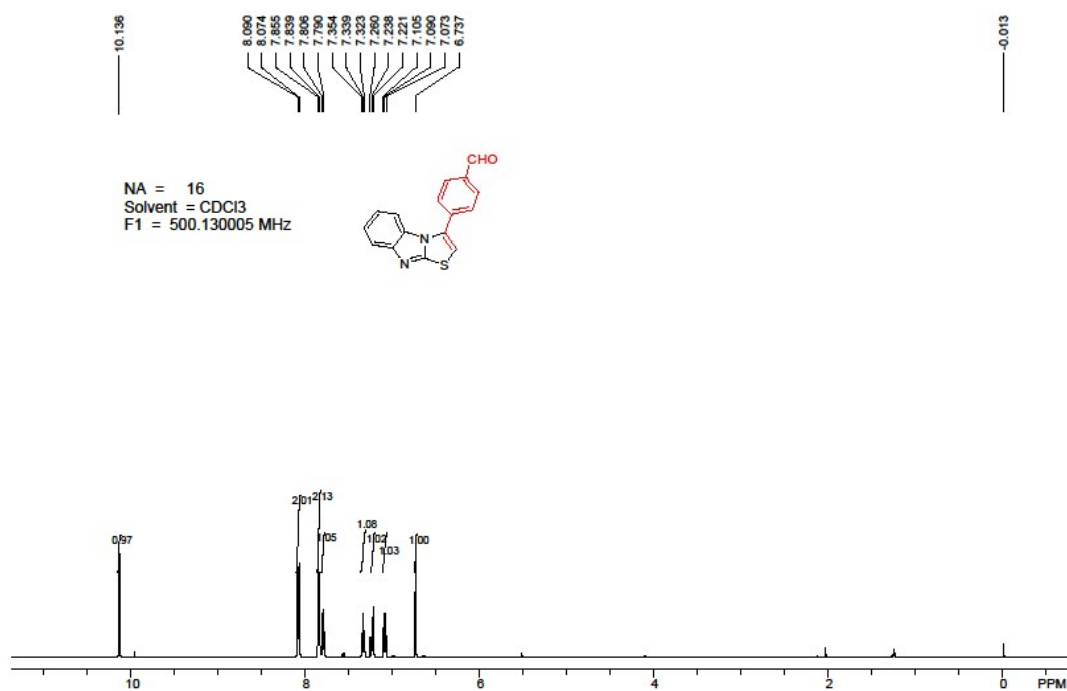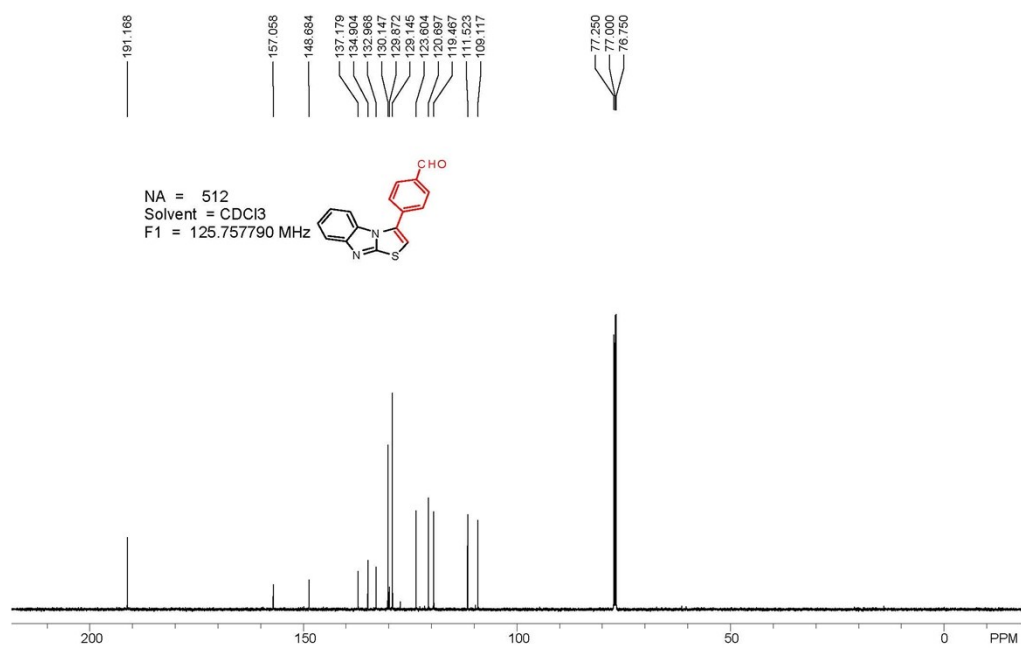

### 3-(4-Methoxyphenyl)thiazolo[3,2-a]benzimidazole (3ga)

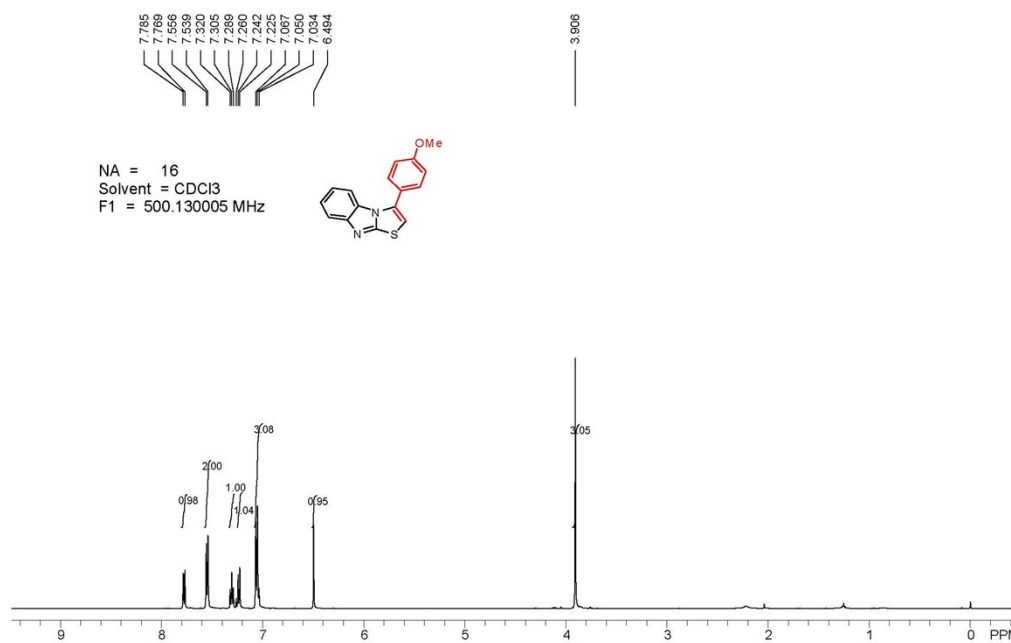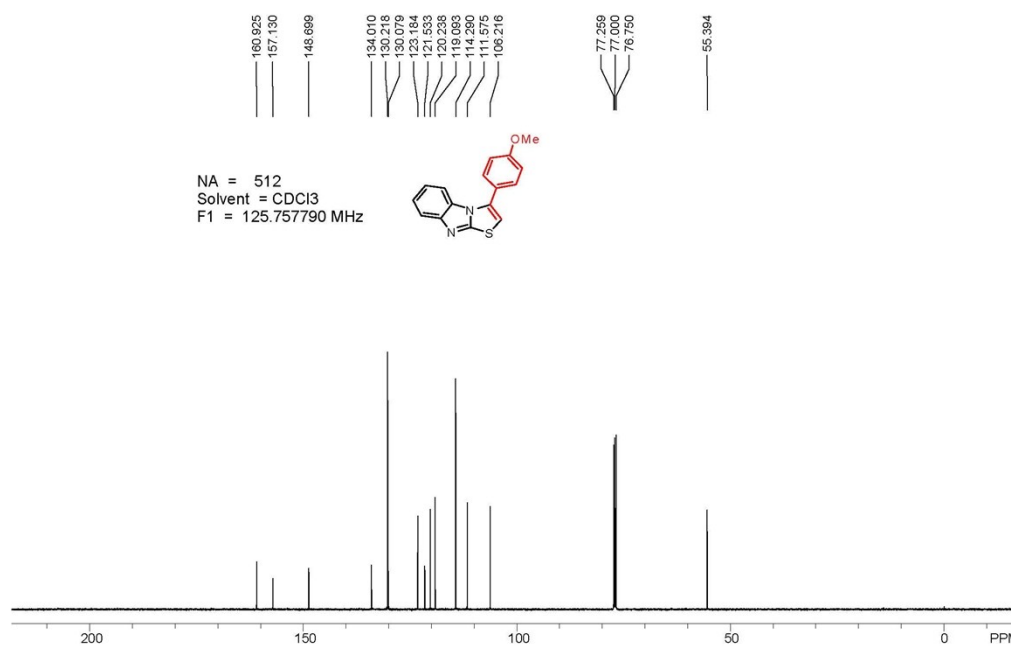

### 3-(4-Propylphenyl)thiazolo[3,2-a]benzimidazole (3ha)

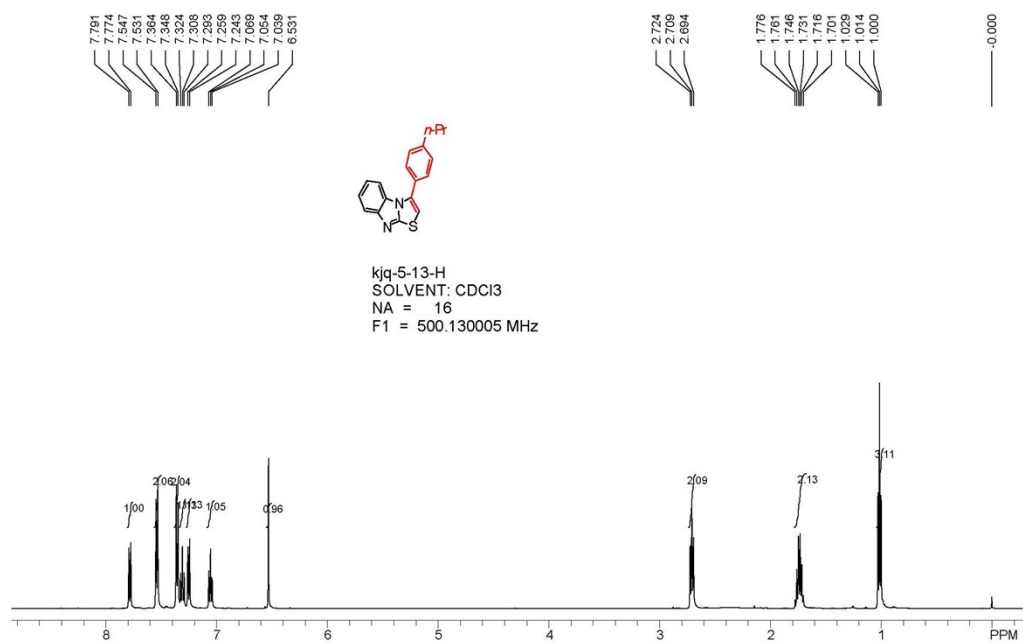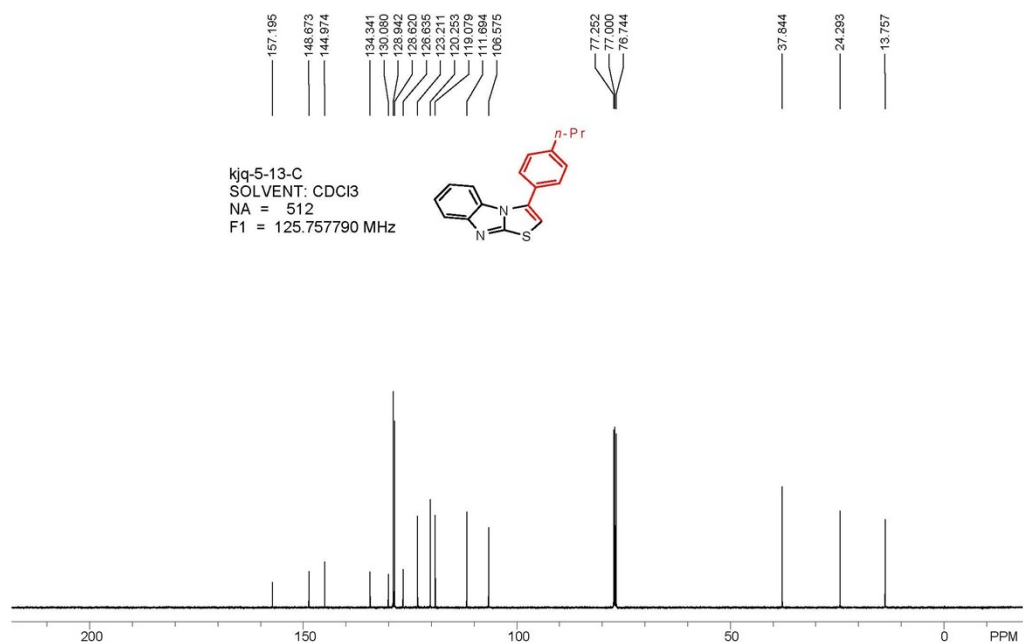

### 3-(4-Methylphenyl)thiazolo[3,2-a]benzimidazole (3ia)

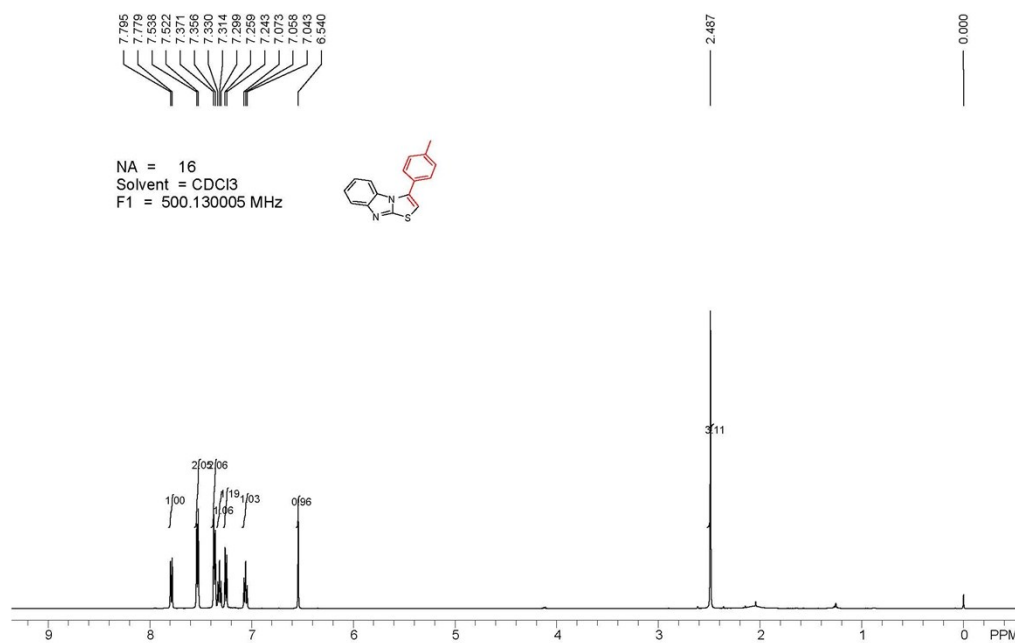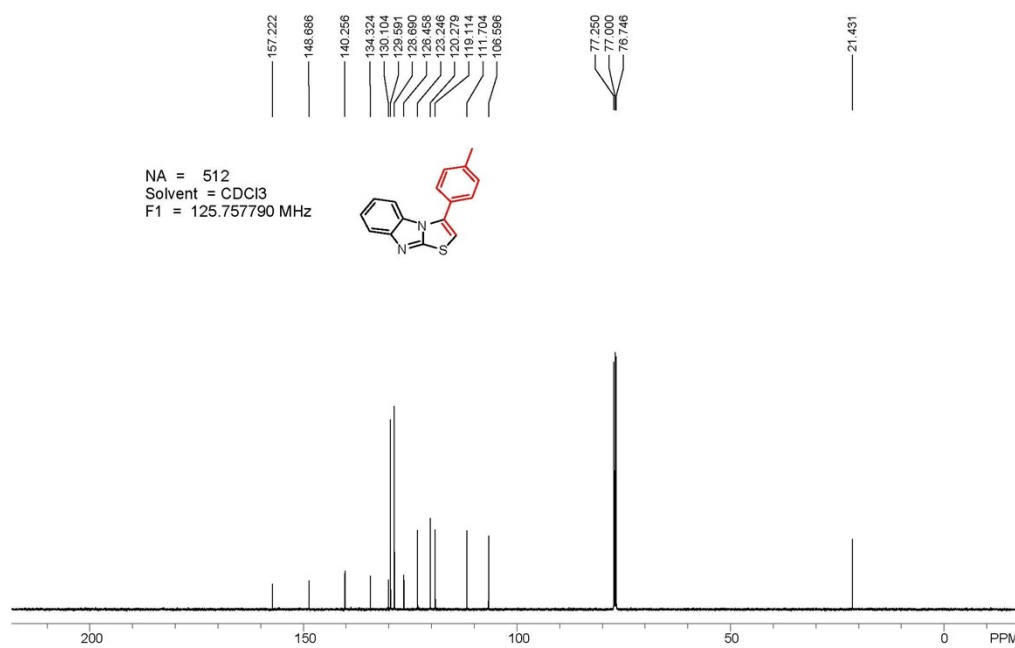

### 3-Phenylthiazolo[3,2-a]benzimidazole (3ja)

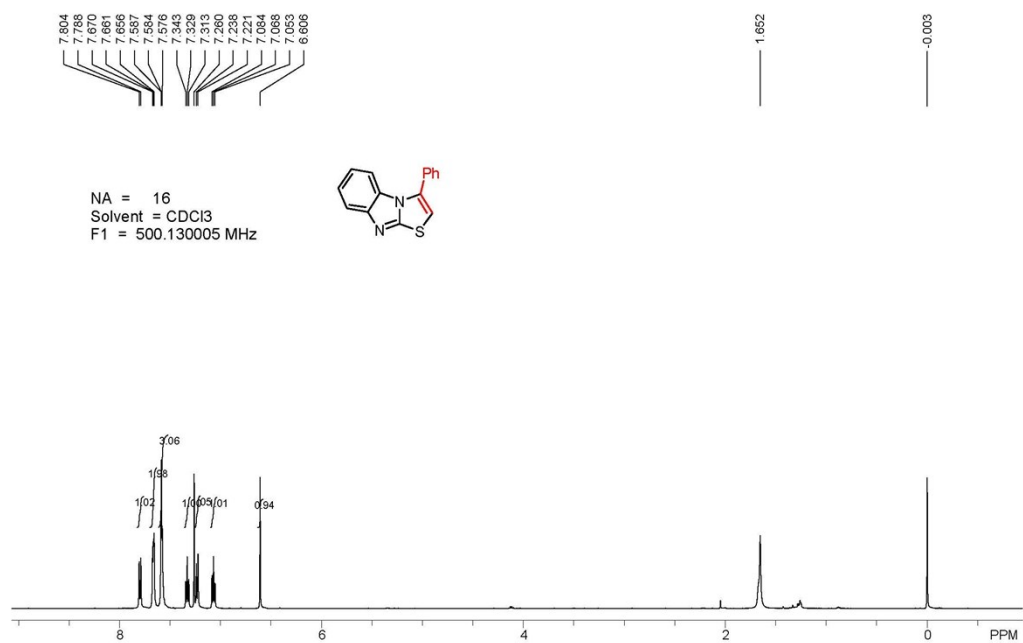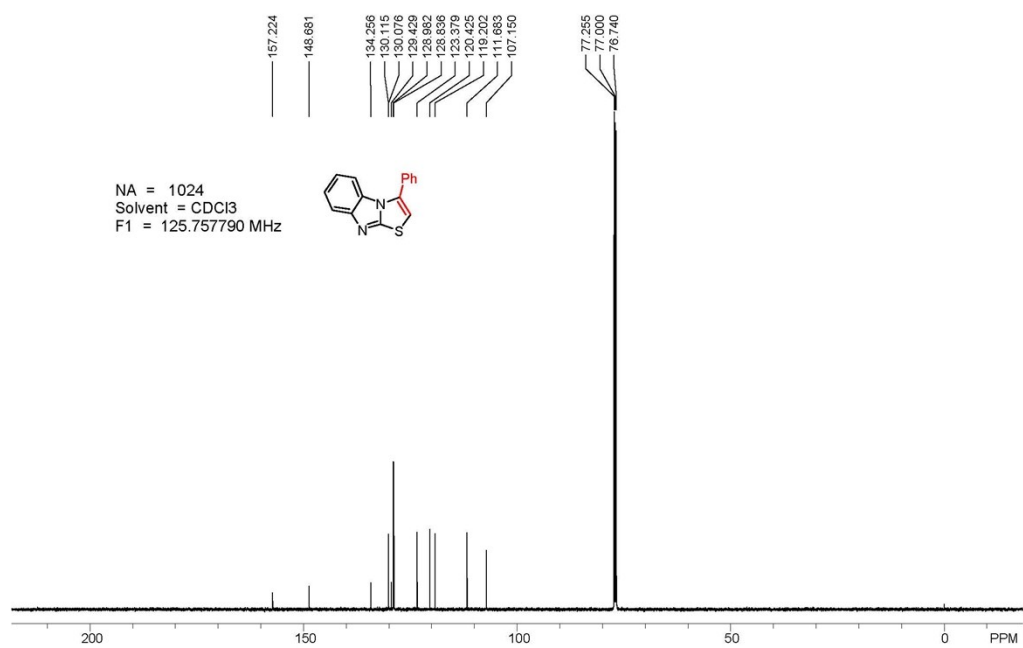

### 3-(3,5-Bis(trifluoromethyl)phenyl)thiazolo[3,2-a]benzimidazole (3ka)

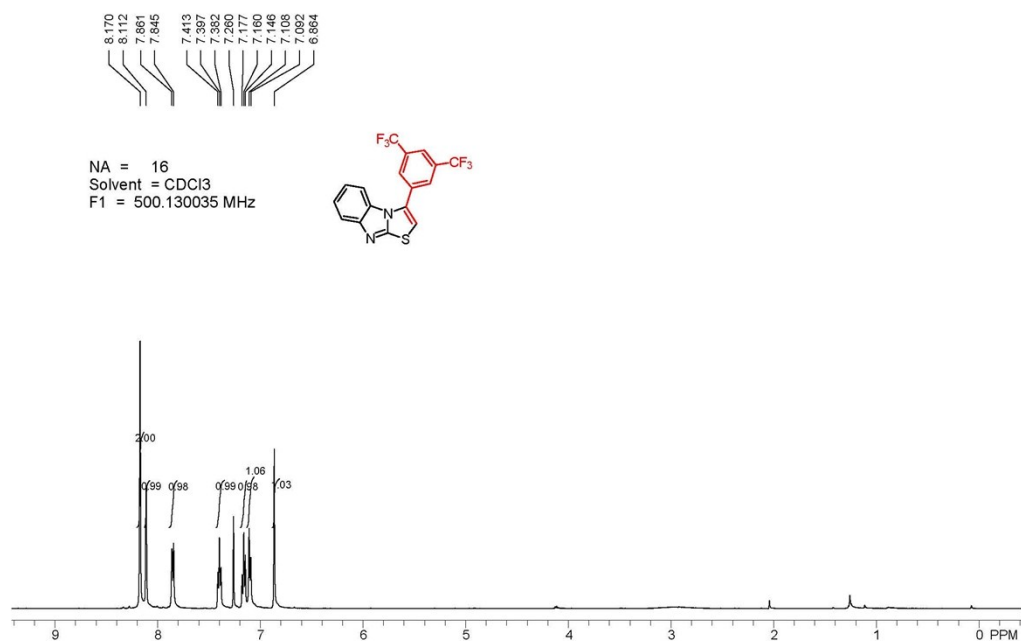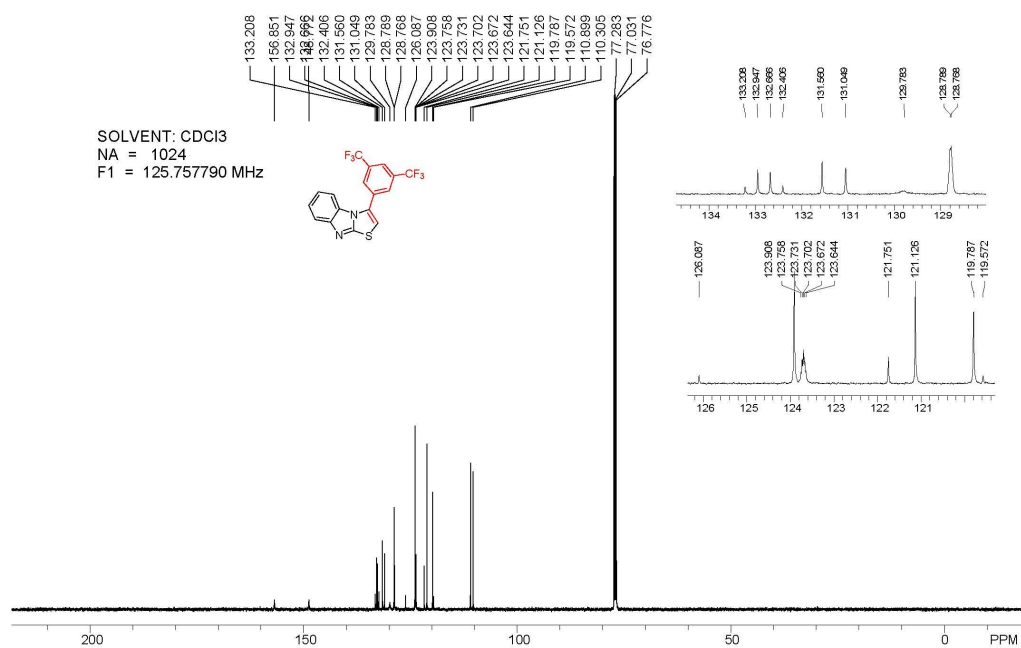

### 3-Thiophen-2-ylthiazolo[3,2-a]benzimidazole (3la)

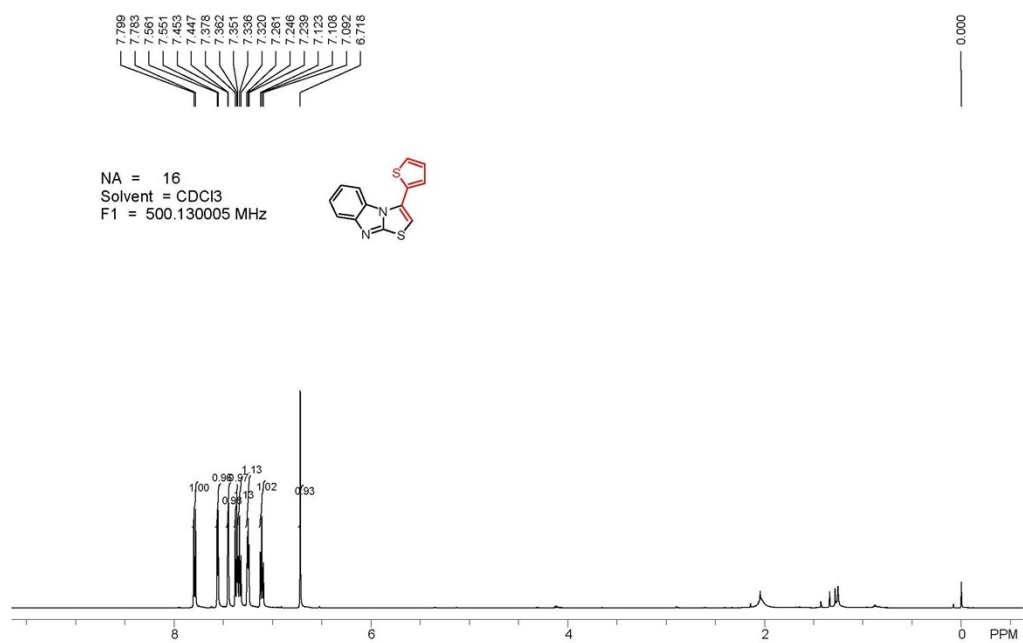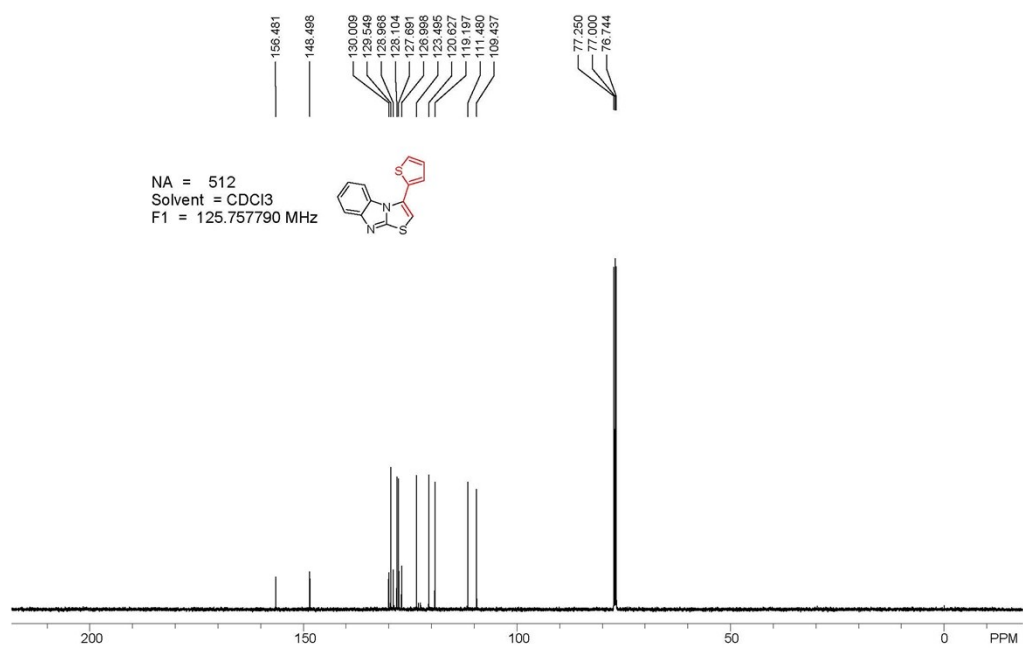



### 3-Thiophen-2-ylthiazolo[3,2-a]benzimidazole (3ma)

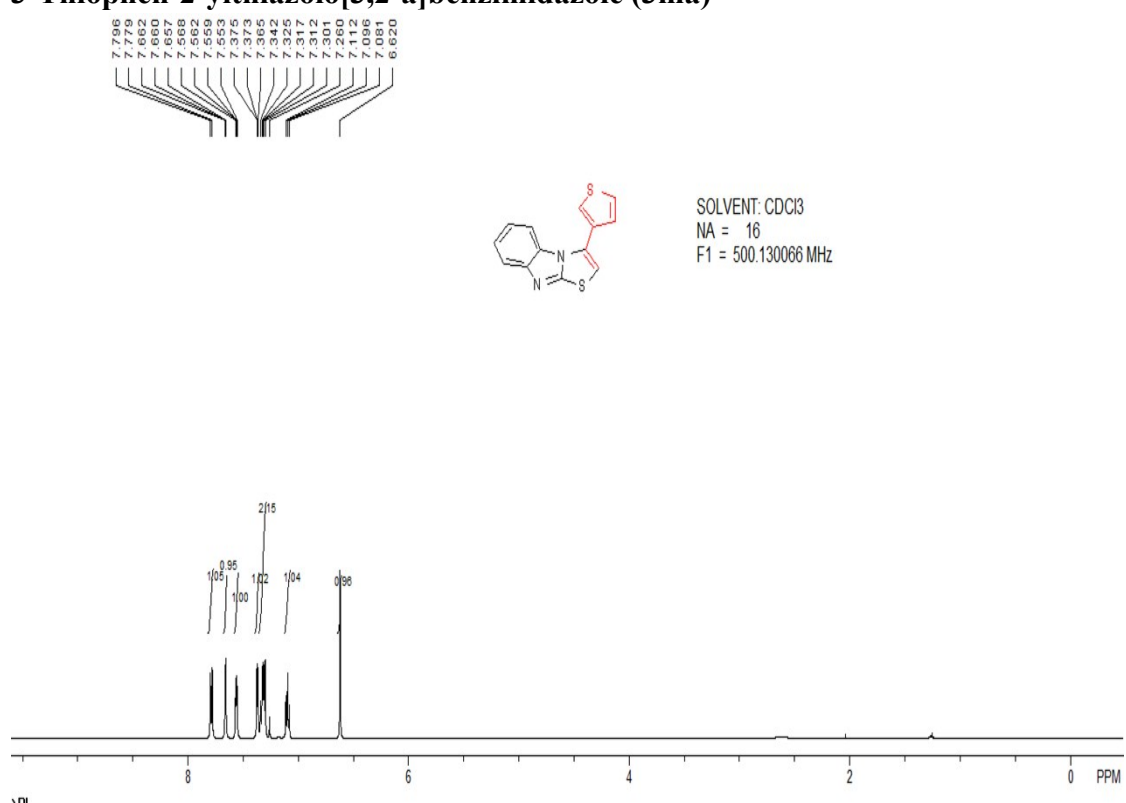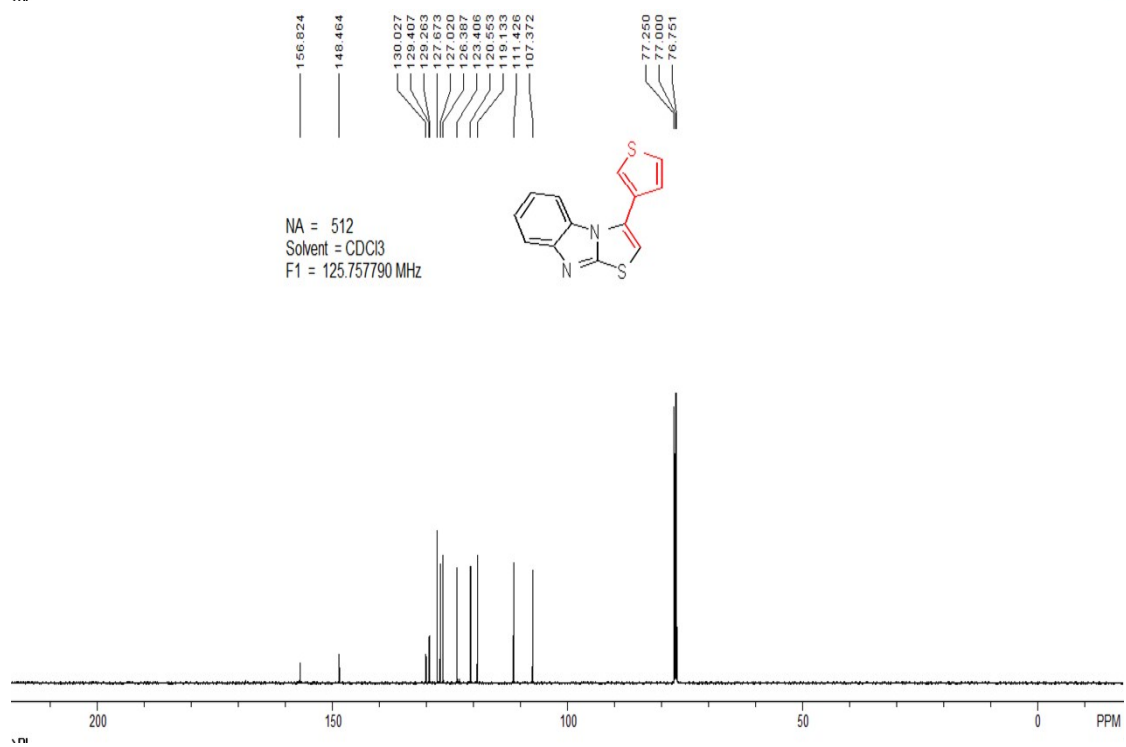

### 3-Pyridin-2-ylthiazolo[3,2-a]benzimidazole (3na)

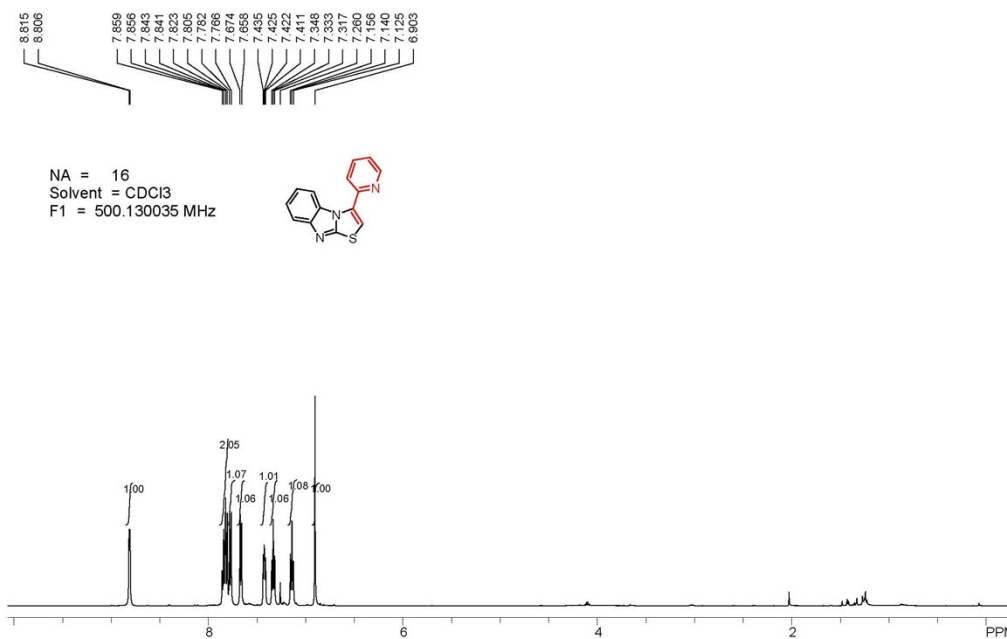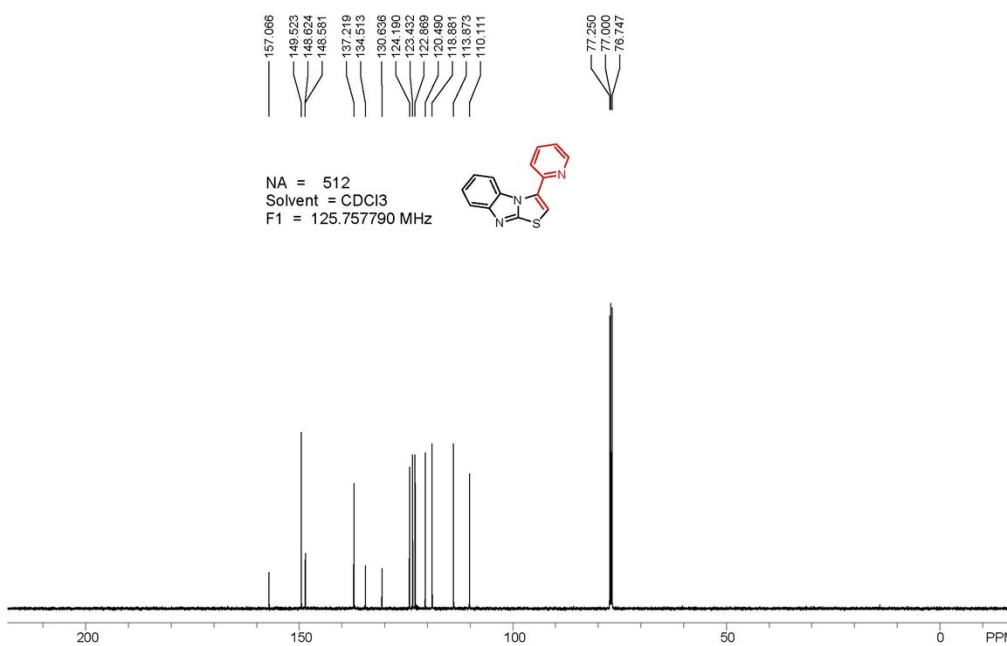

### 3-Pyridin-4-ylthiazolo[3,2-a]benzimidazole (30a)

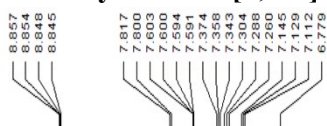

NA = 16  
Solvent = CDCl<sub>3</sub>  
F1 = 500.130035 MHz

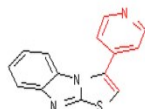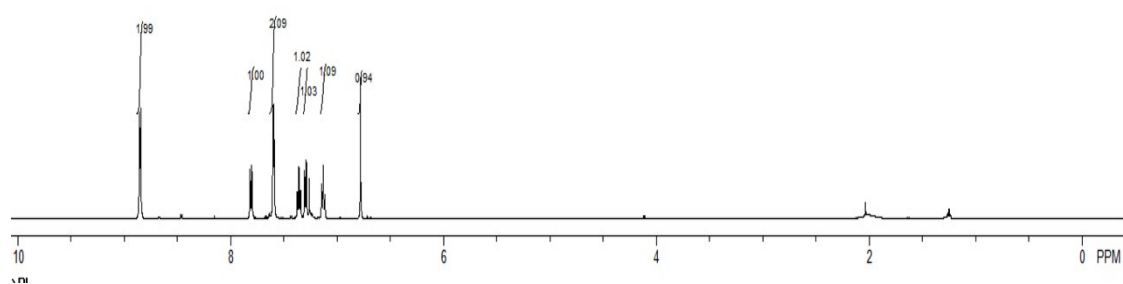

NA = 512  
Solvent = CDCl<sub>3</sub>  
F1 = 125.757790 MHz

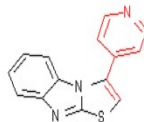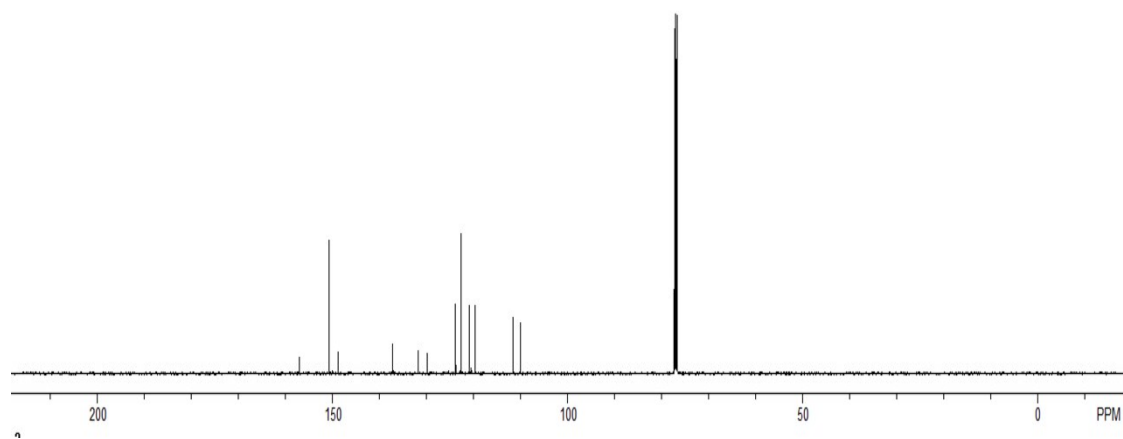

### 3-(Cyclohexen-1-yl)thiazolo[3,2-a]benzimidazole (3pa)

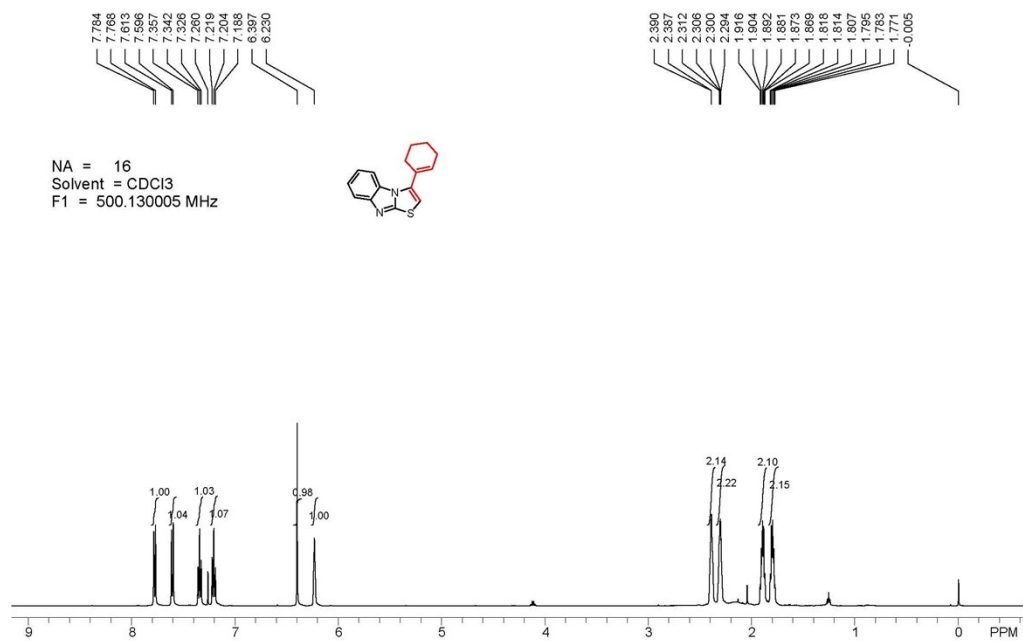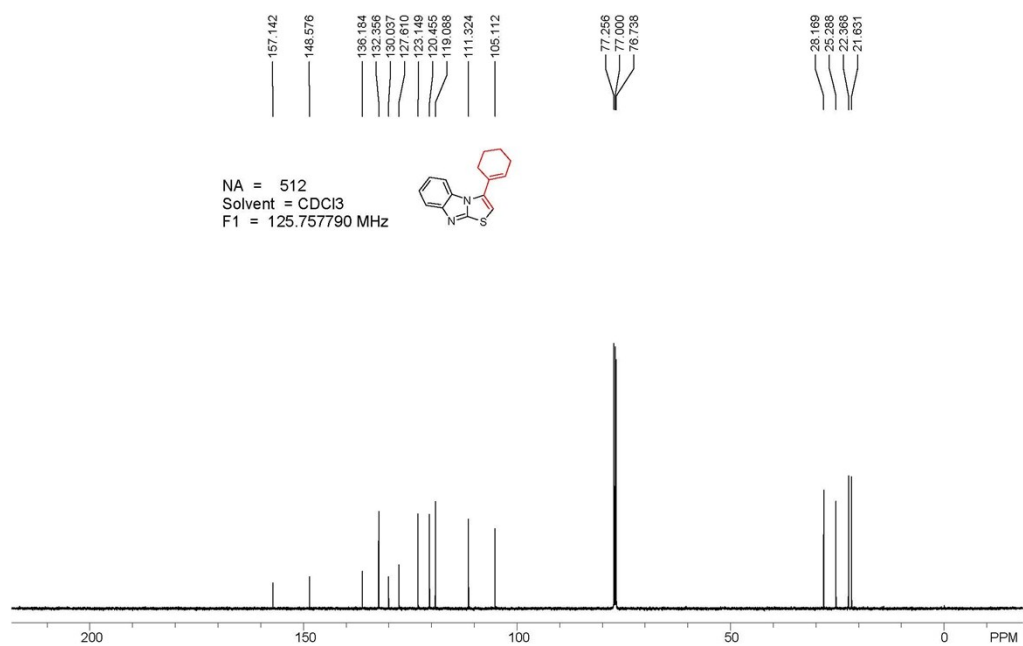

### 3-(Triethylsilyl)thiazolo[3,2-a]benzimidazole (3qa)

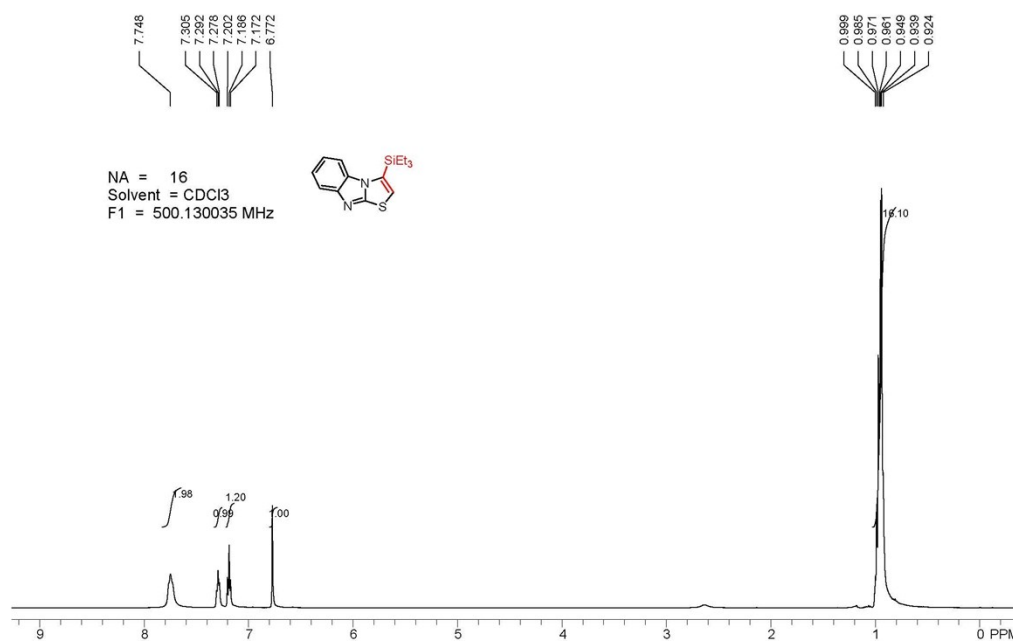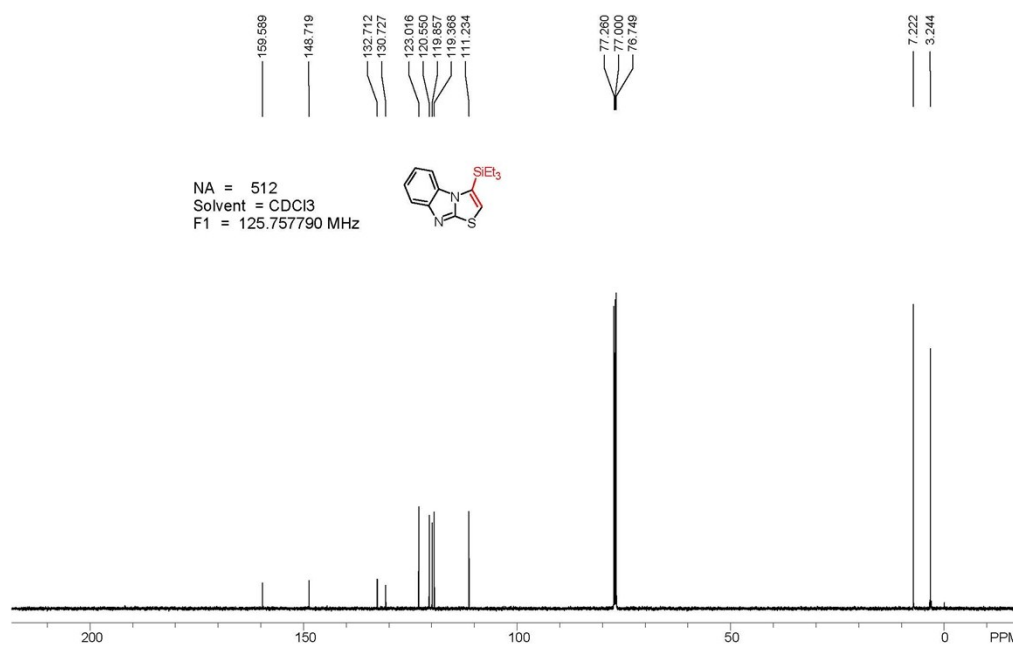

### 3-(Trimethylsilyl)thiazolo[3,2-a]benzimidazole (3ra)

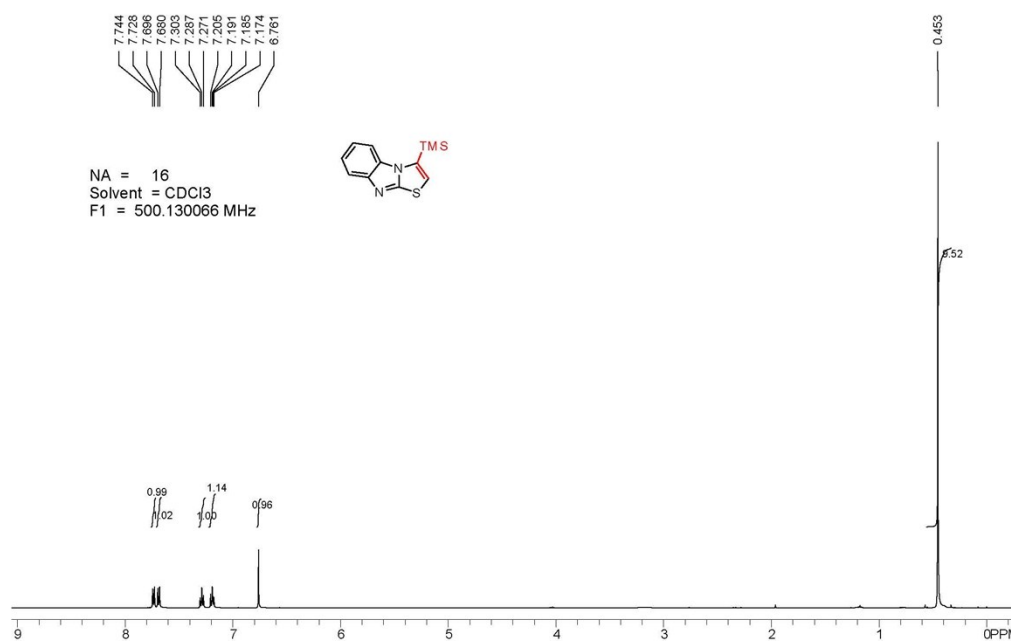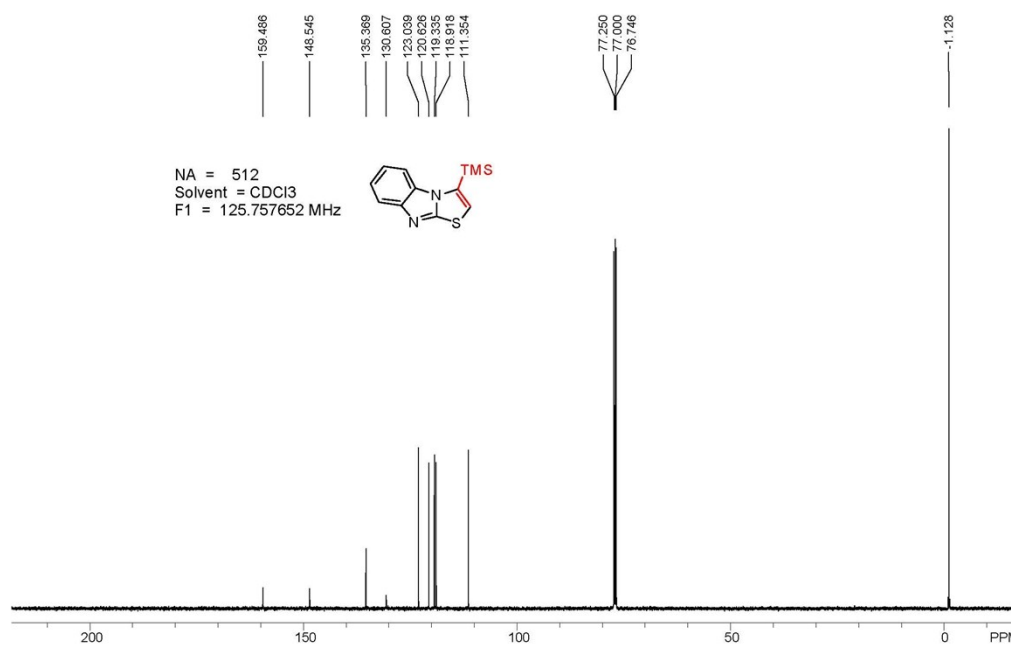

### 3-(Cyclopropyl)thiazolo[3,2-a]benzimidazole (3sa)

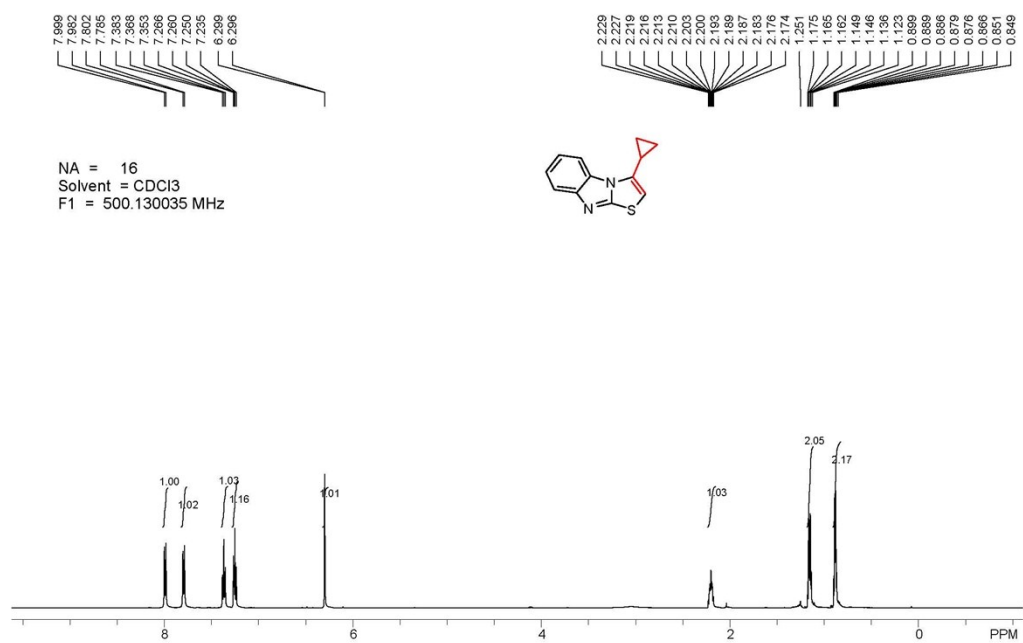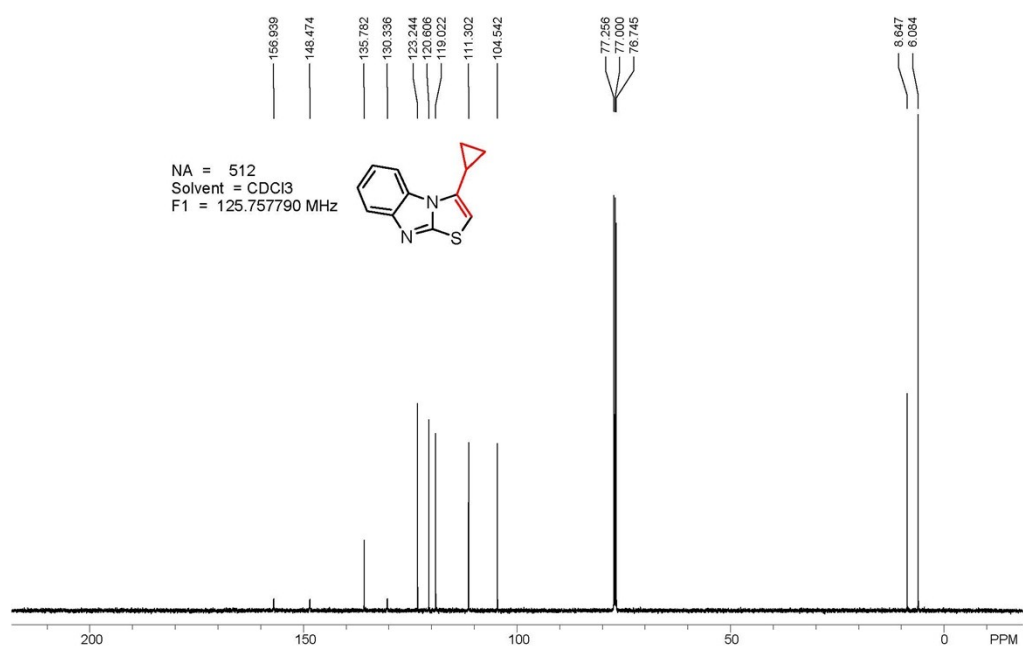

### 3-*tert*-Butylthiazolo[3,2-*a*]benzimidazole (3ta)

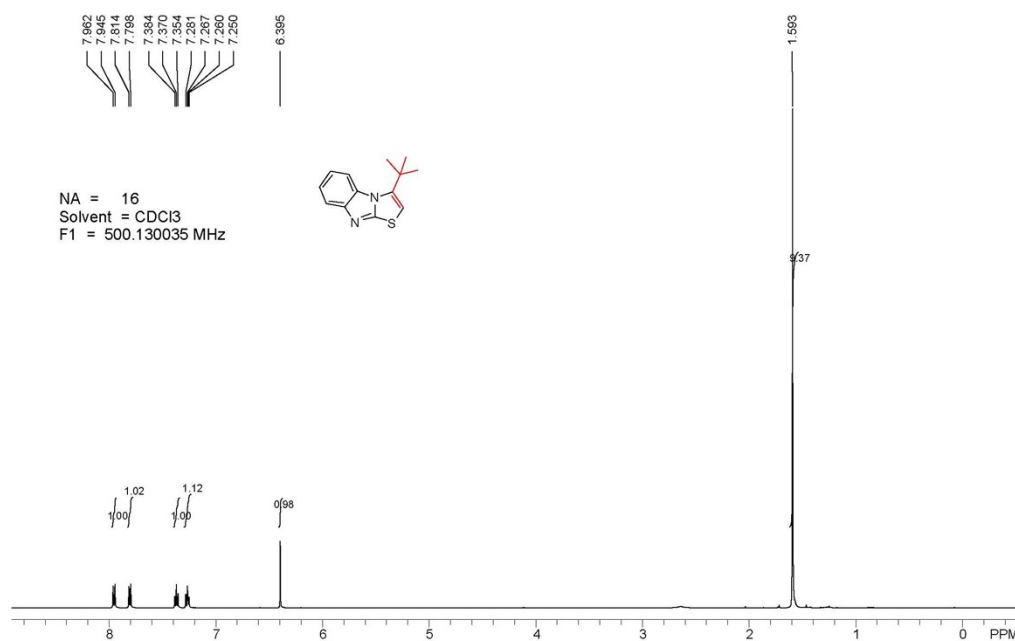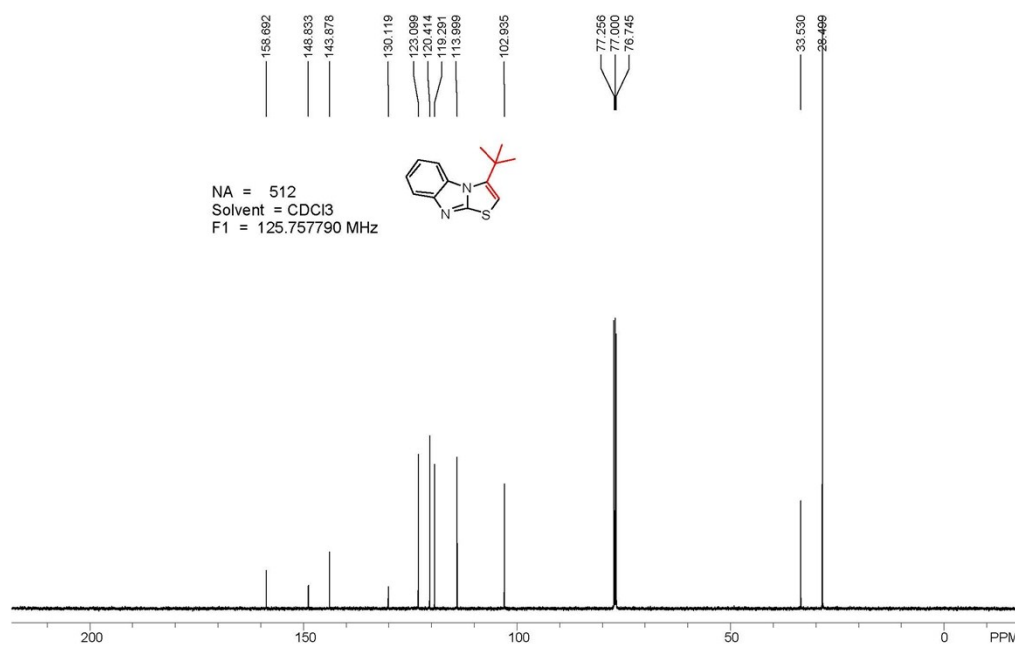



### 3-Butylthiazolo[3,2-a]benzimidazole (3ua)

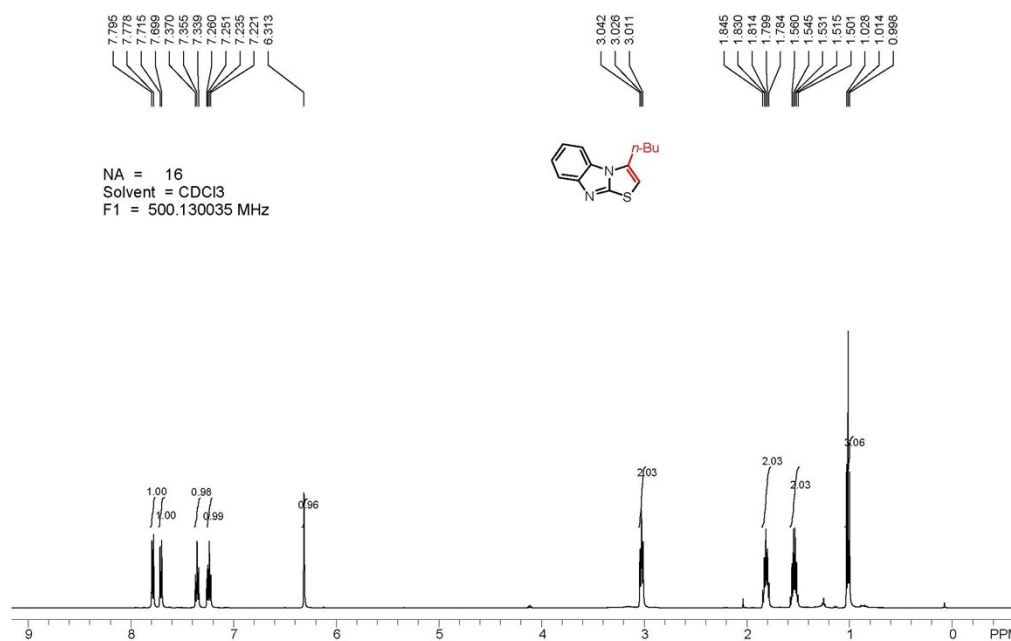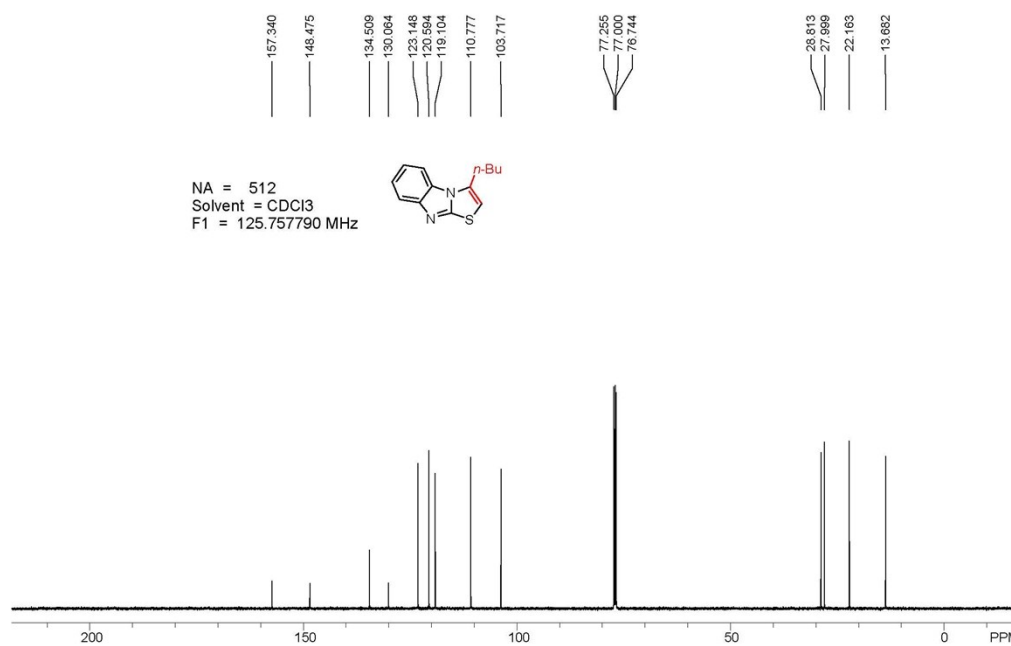

***N,N*-Dimethylthiazolo[3,2-*a*]benzimidazol-3-yl-methanamine (3va)**

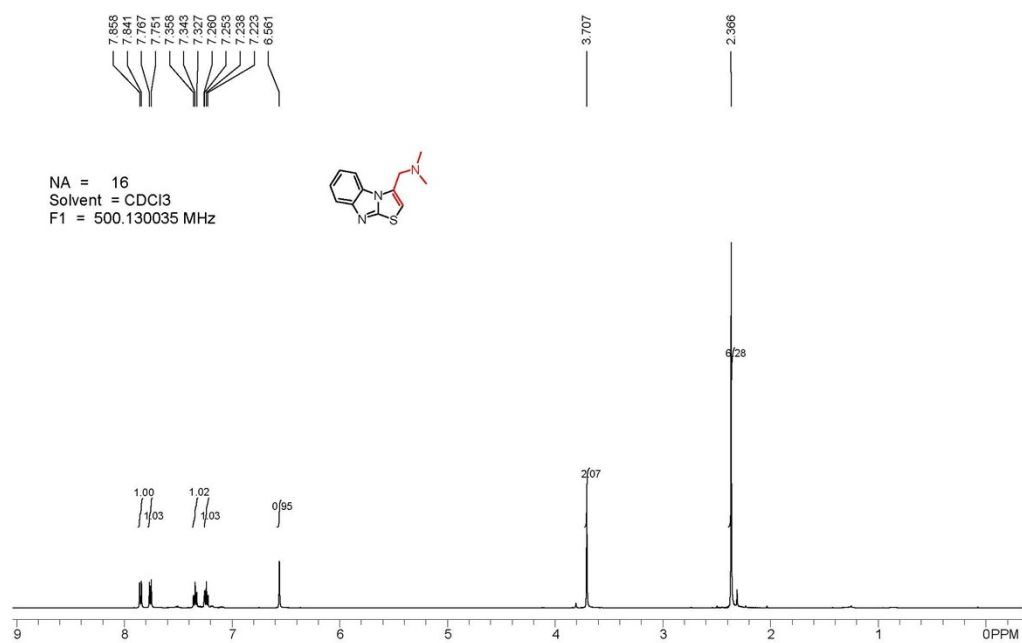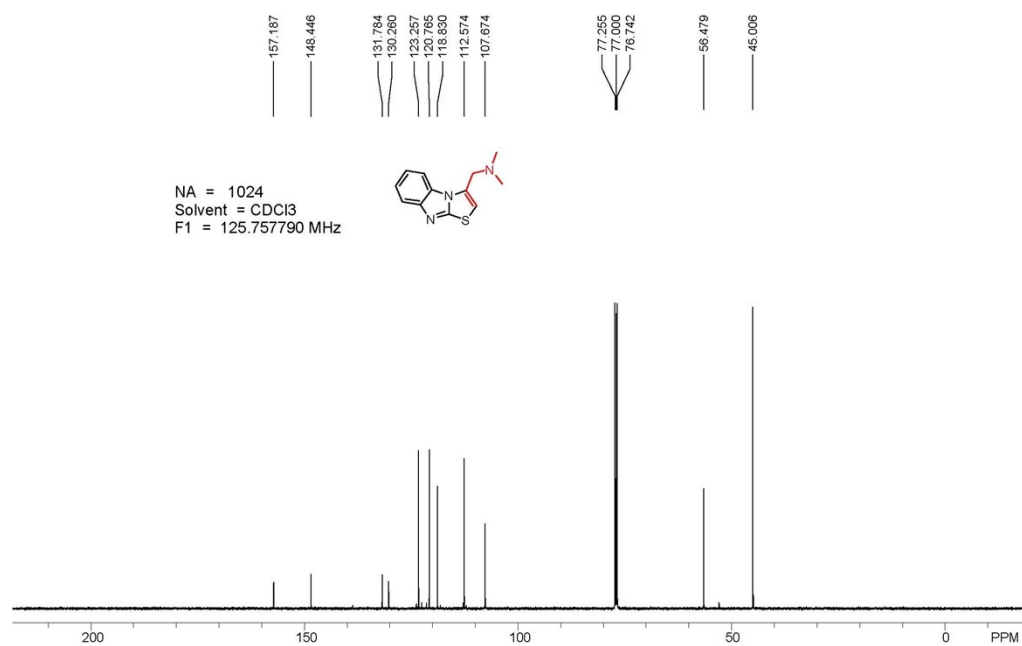

### 3-((1H-Indol-1-yl)methyl)thiazolo[3,2-a]benzimidazole (3wa)

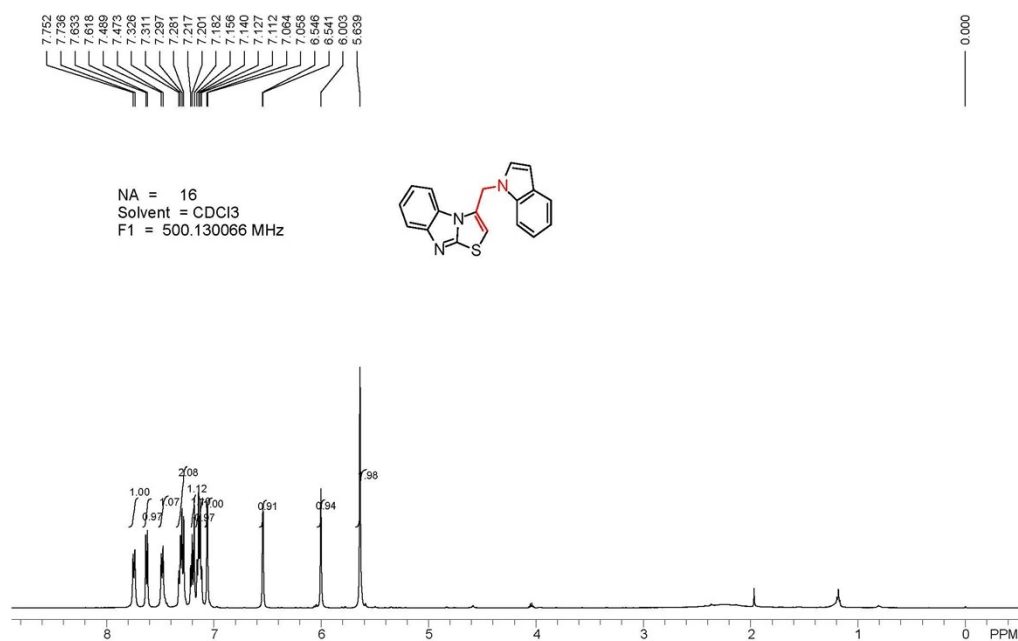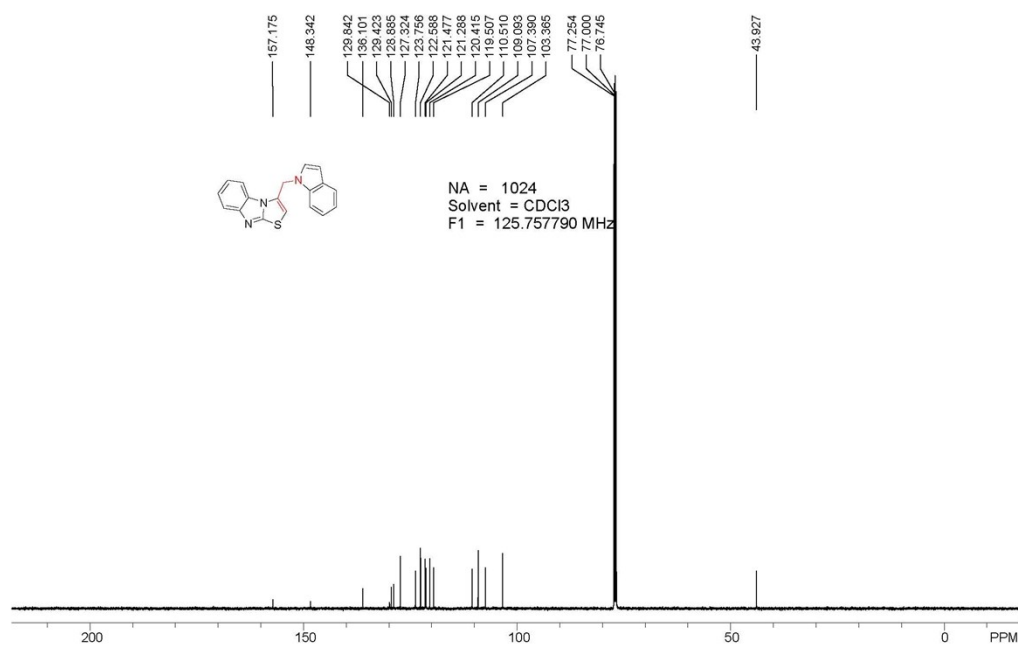

### 3-Phenoxymethylthiazolo[3,2-a]benzimidazole (3xa)

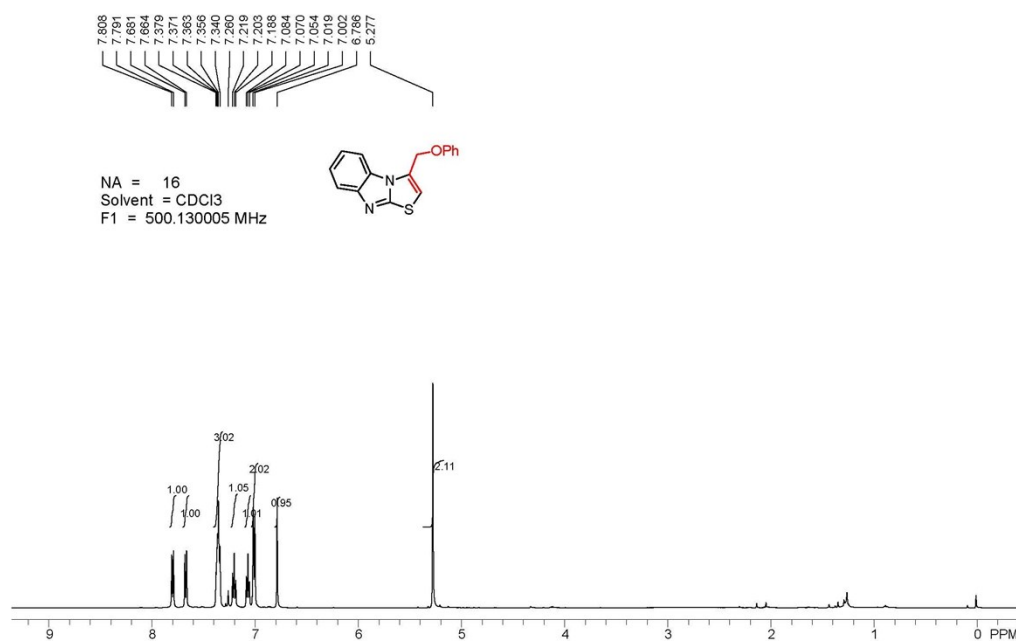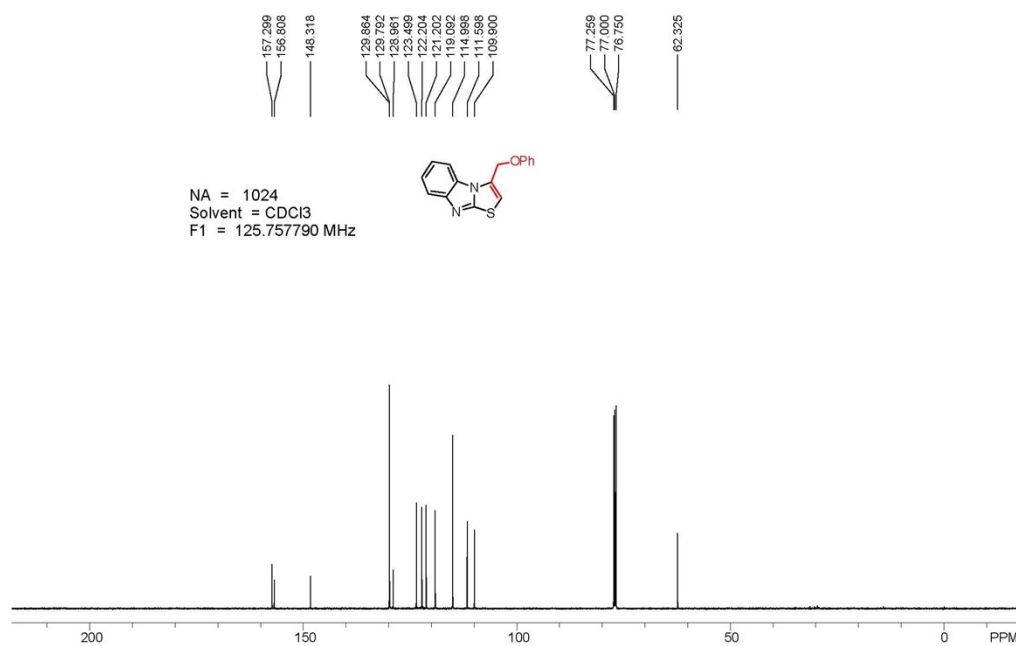

### 3-Phenylthiomethylthiazolo[3,2-a]benzimidazole (3ya)

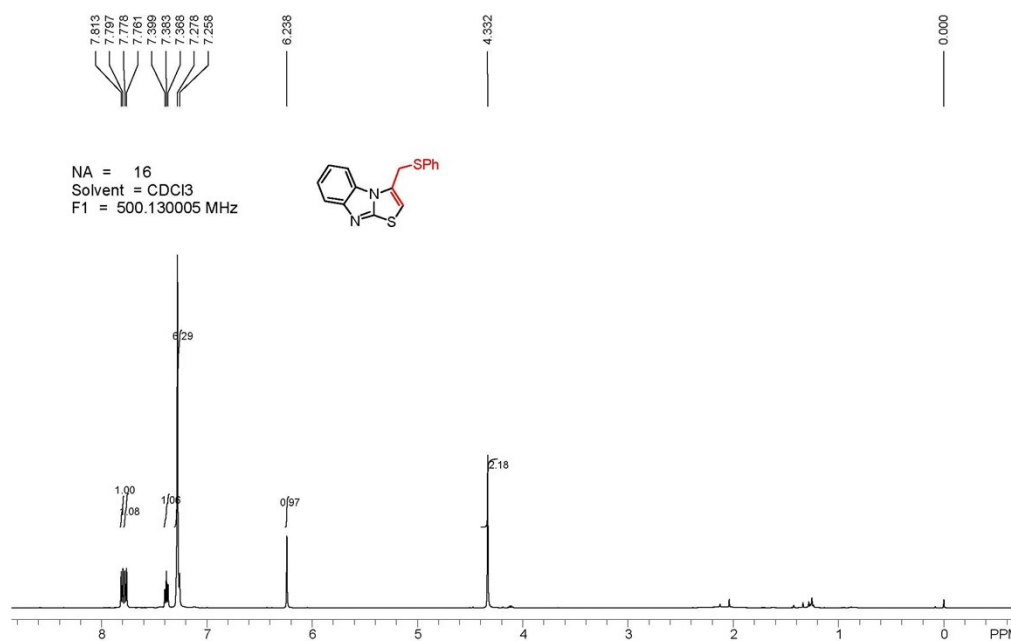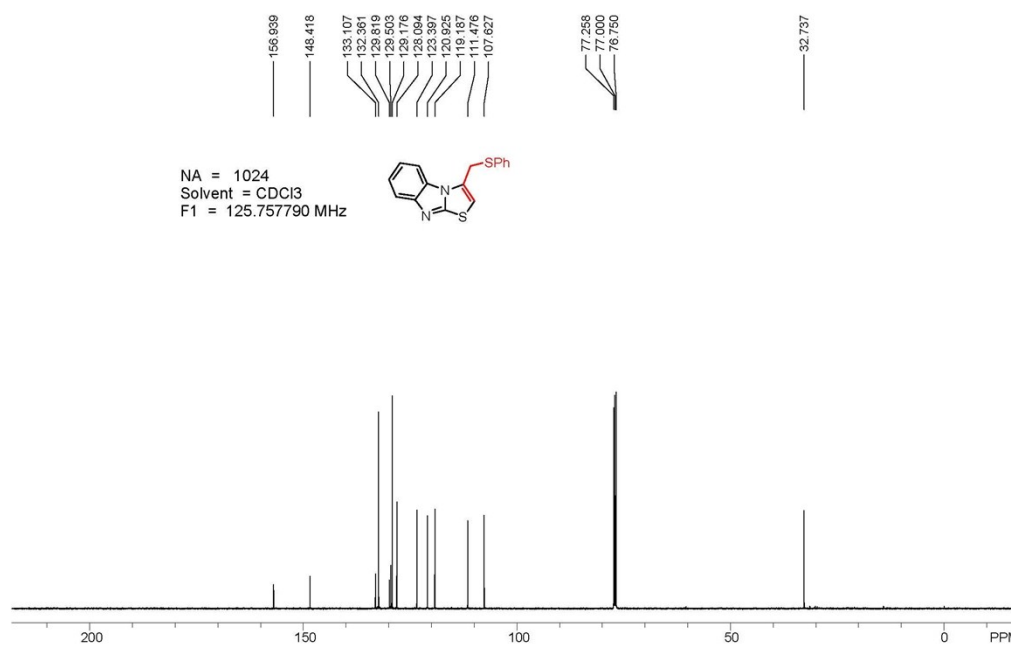

# Thiazolo[3,2-*a*]benzimidazol-3-yl-ethanol (3za)

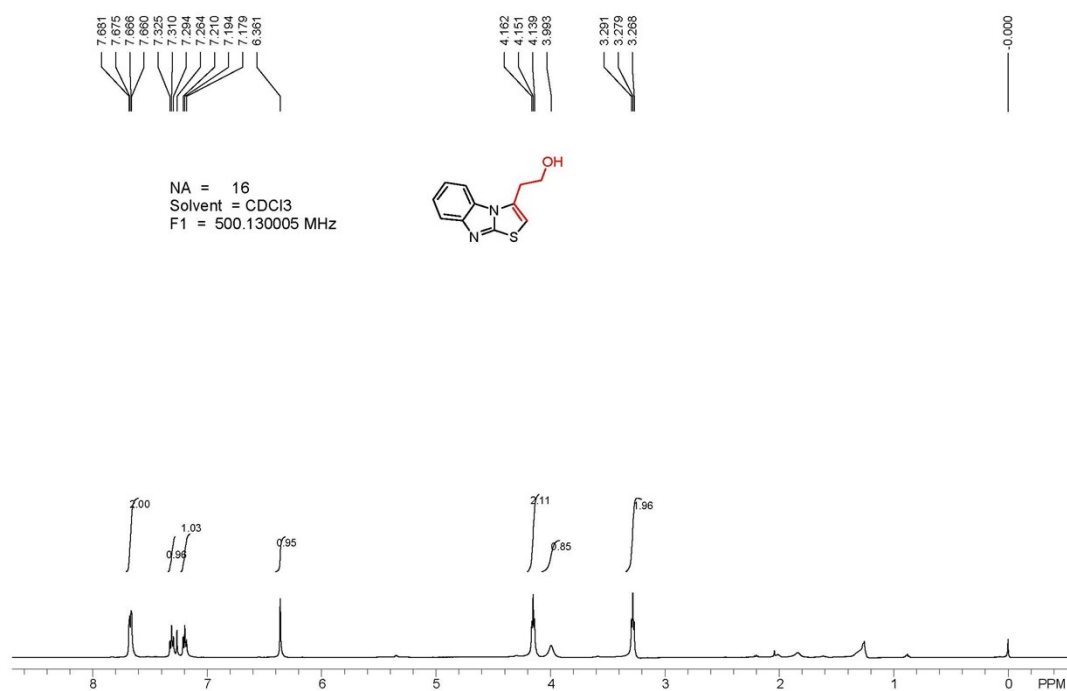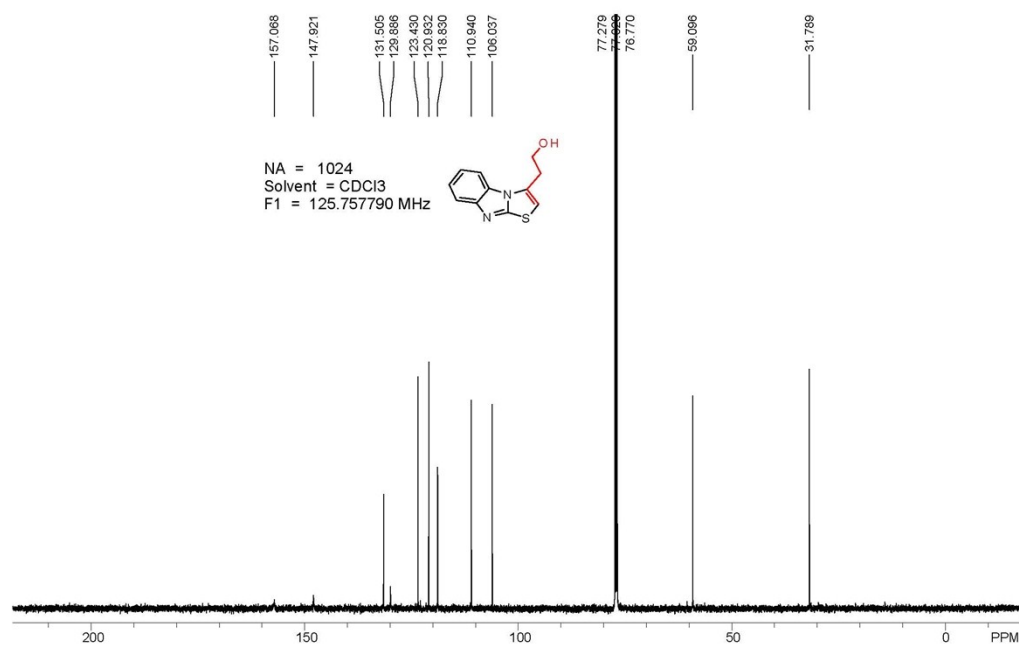

# Thiazolo[3,2-a]benzimidazol-3-yl-(phenyl)methanol (3Aa)

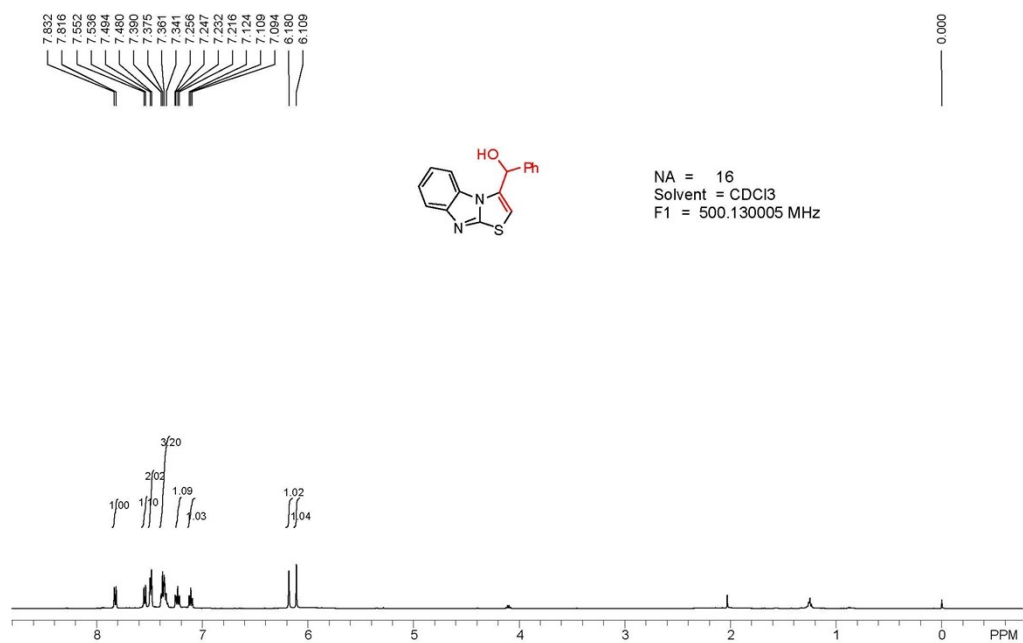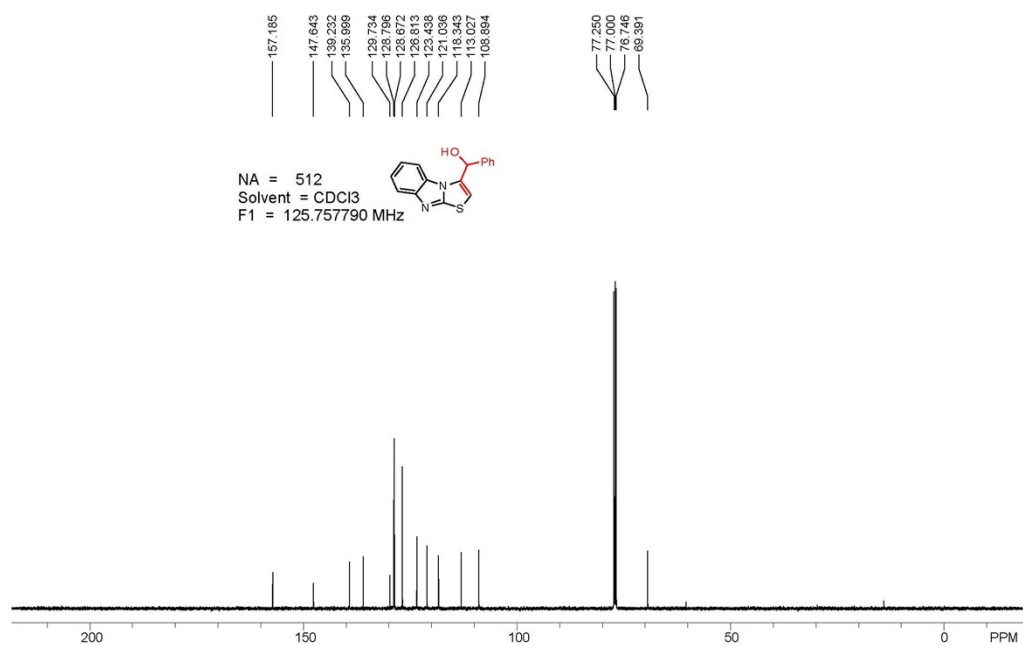

# Thiazolo[3,2-*a*]benzimidazol-3-yl-propan-2-ol (3Ba)

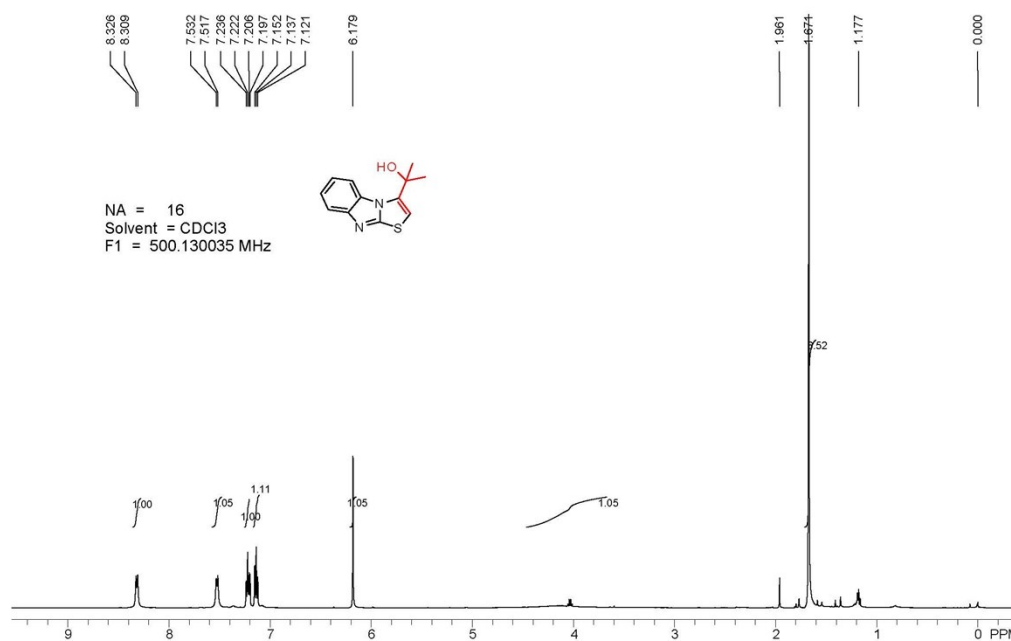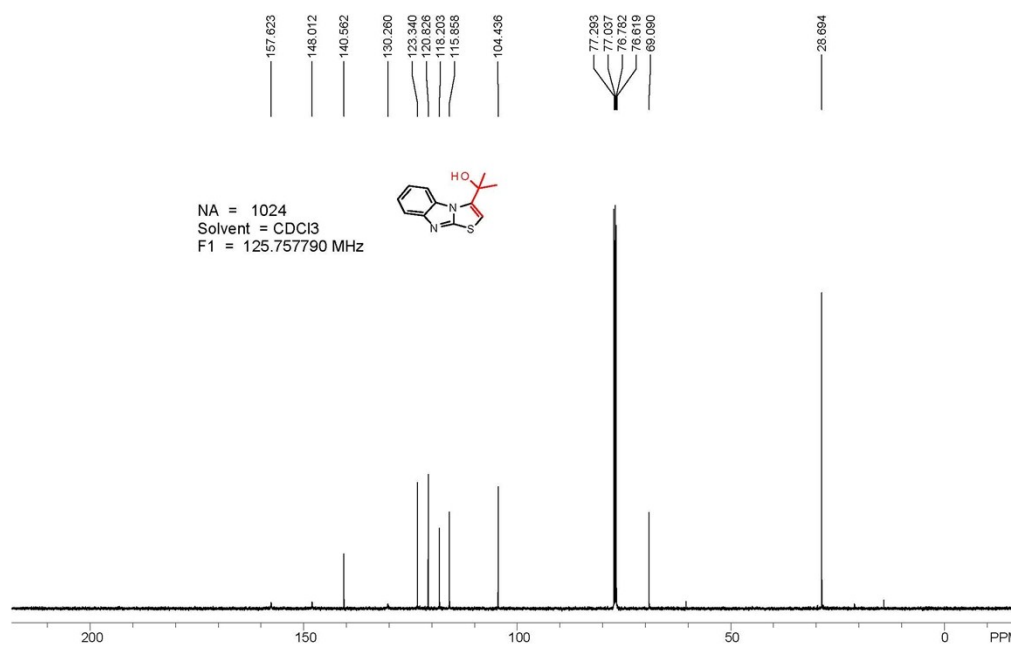



# Thiazolo[3,2-*a*]benzimidazol-3-yl-hexan-1-ol (3Ca)

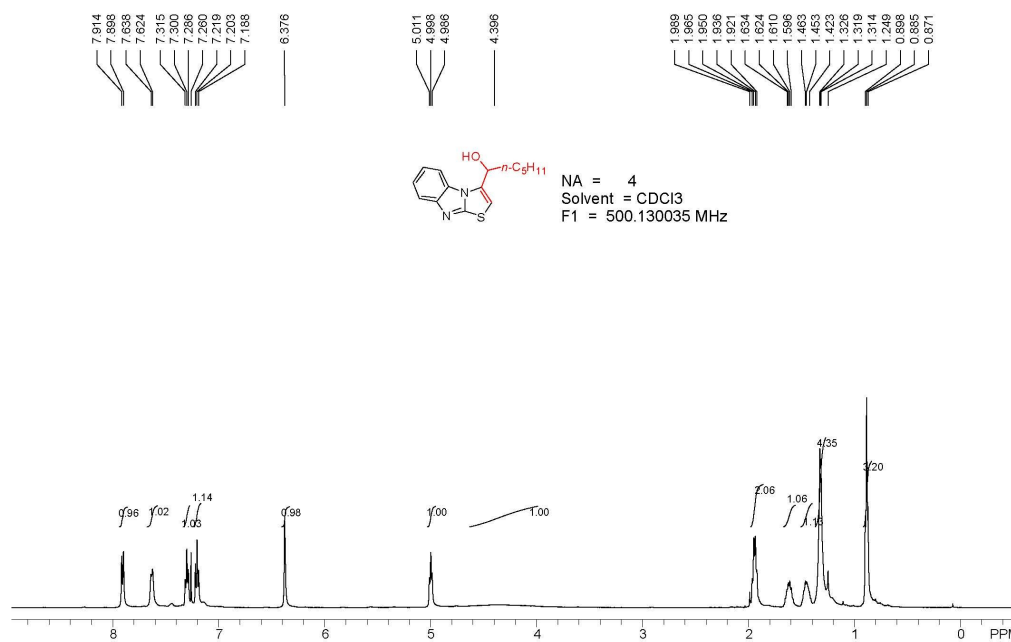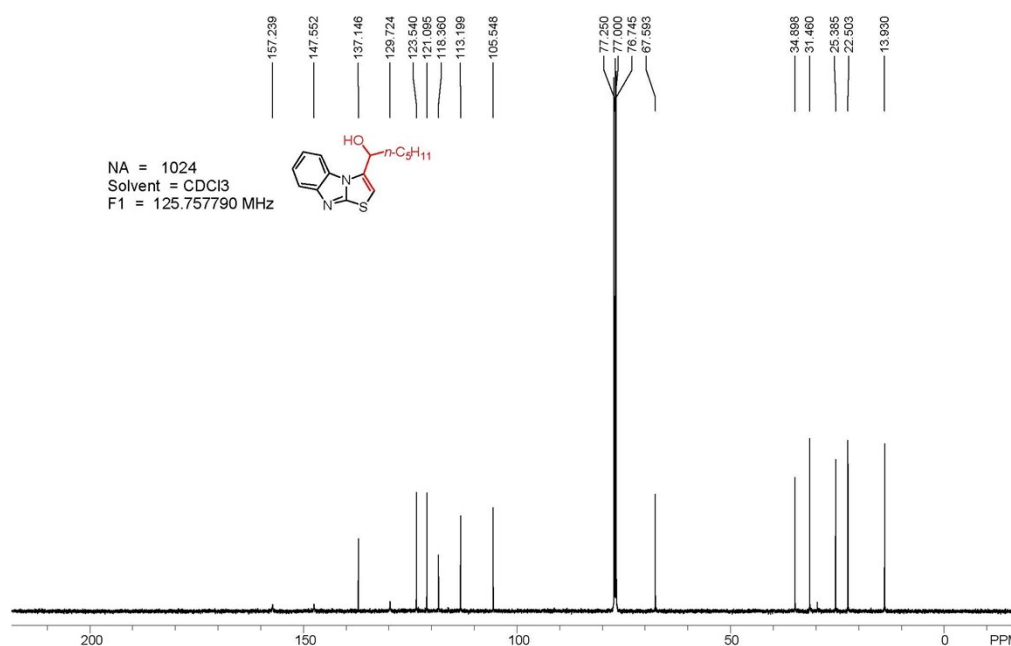

# Thiazolo[3,2-a]benzimidazol-3-yl-cyclohexan-1-ol (3Da)

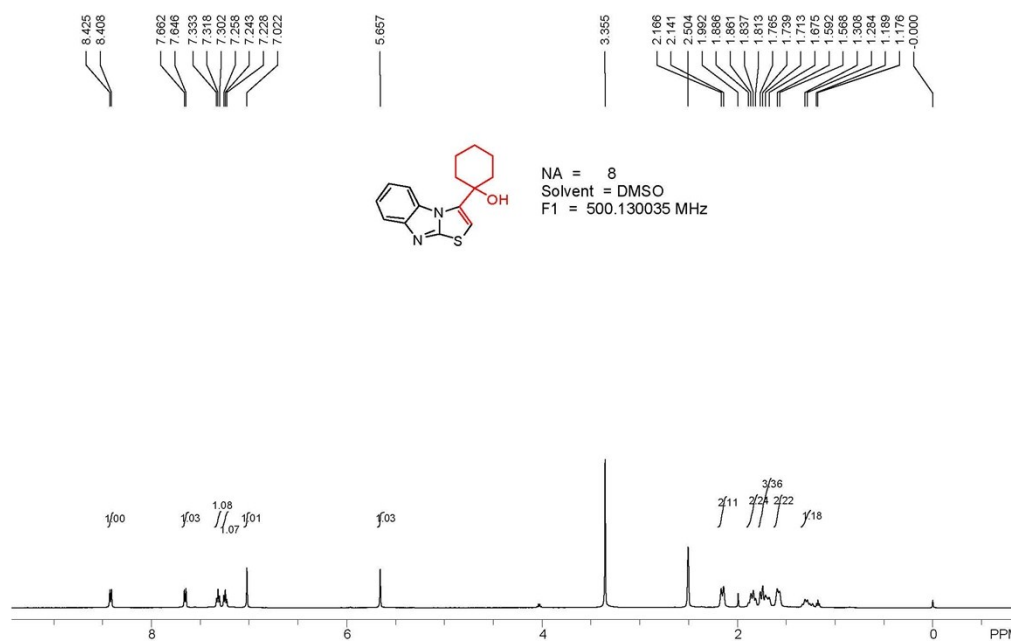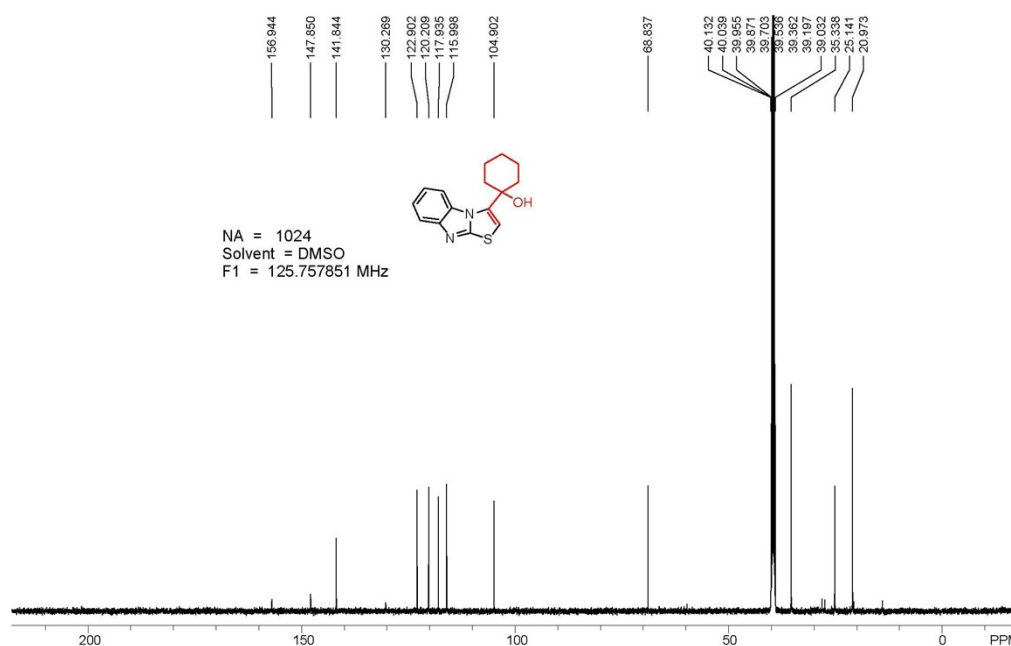

**3-(4-Chlorophenyl)-6-methyl-thiazolo[3,2-a]benzimidazole (3ab) and 3-(4-Chlorophenyl)-7-methyl-thiazolo[3,2-a]benzimidazole (3ab')**

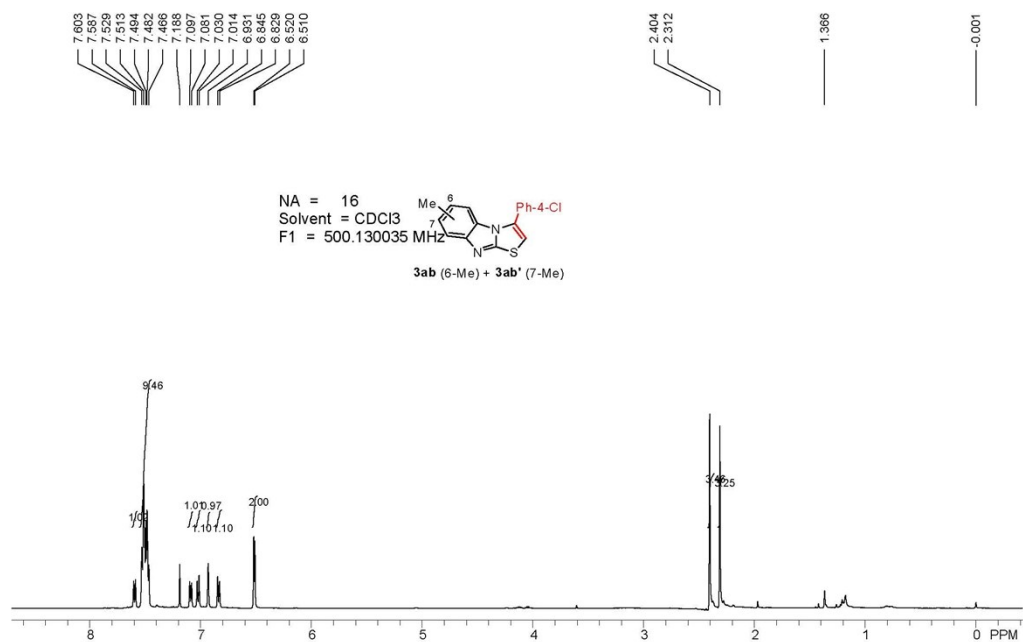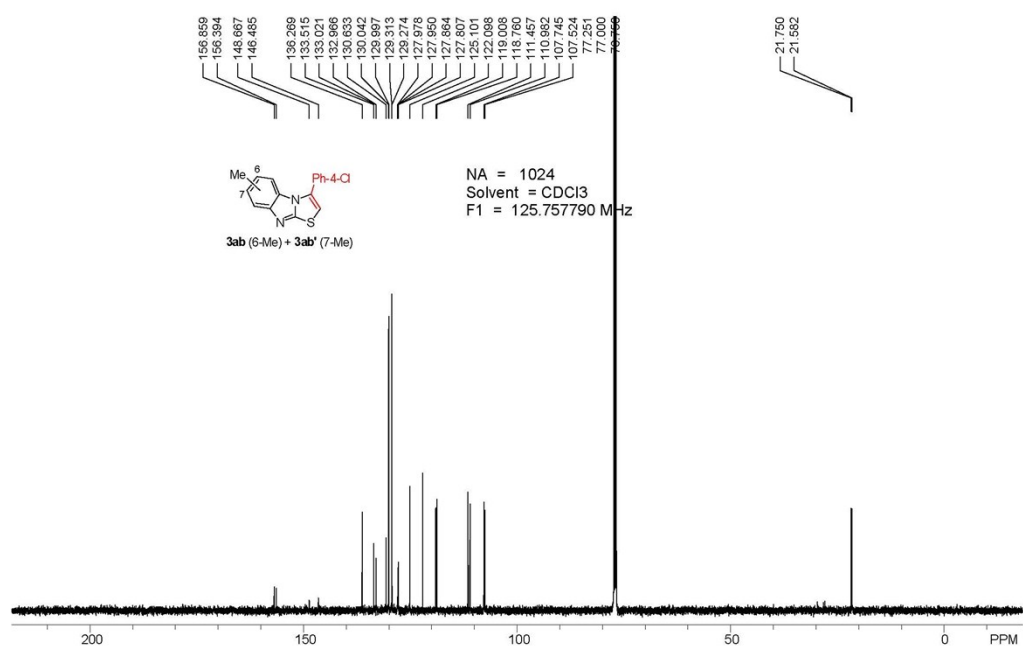

### 3-(4-Chlorophenyl)-7-nitro-thiazolo[3,2-a]benzimidazole (3ac')

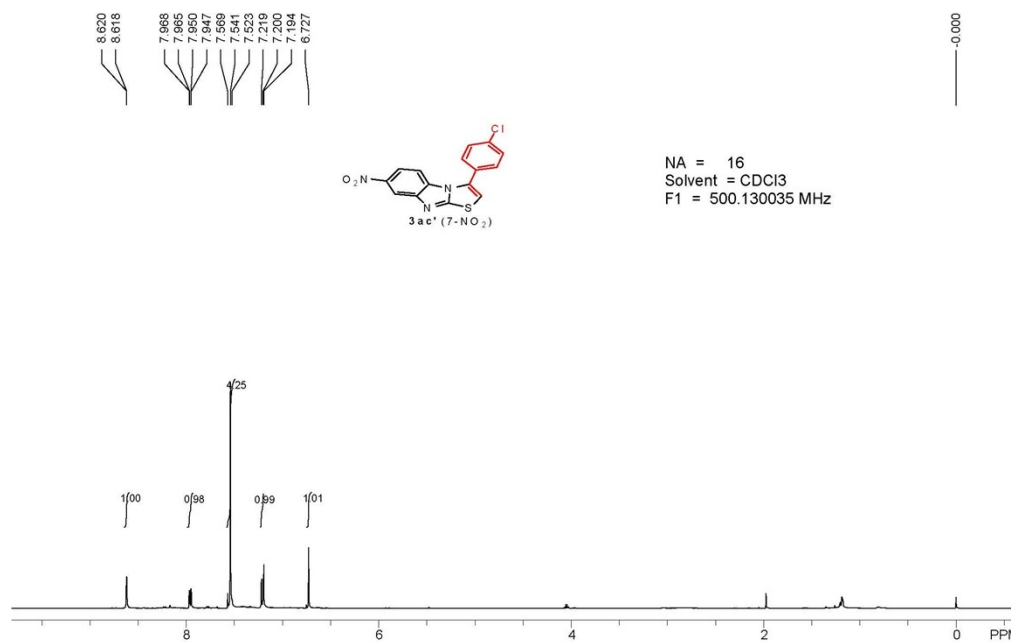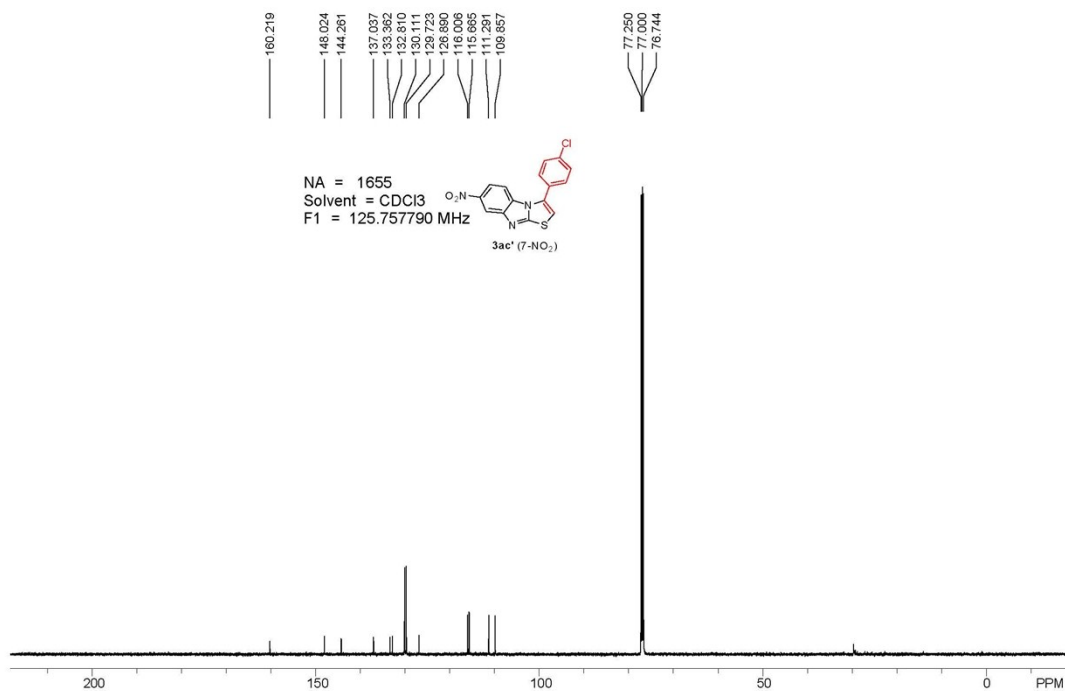

### 3-(4-Chlorophenyl)-6-nitro-thiazolo[3,2-a]benzimidazole (3ac)

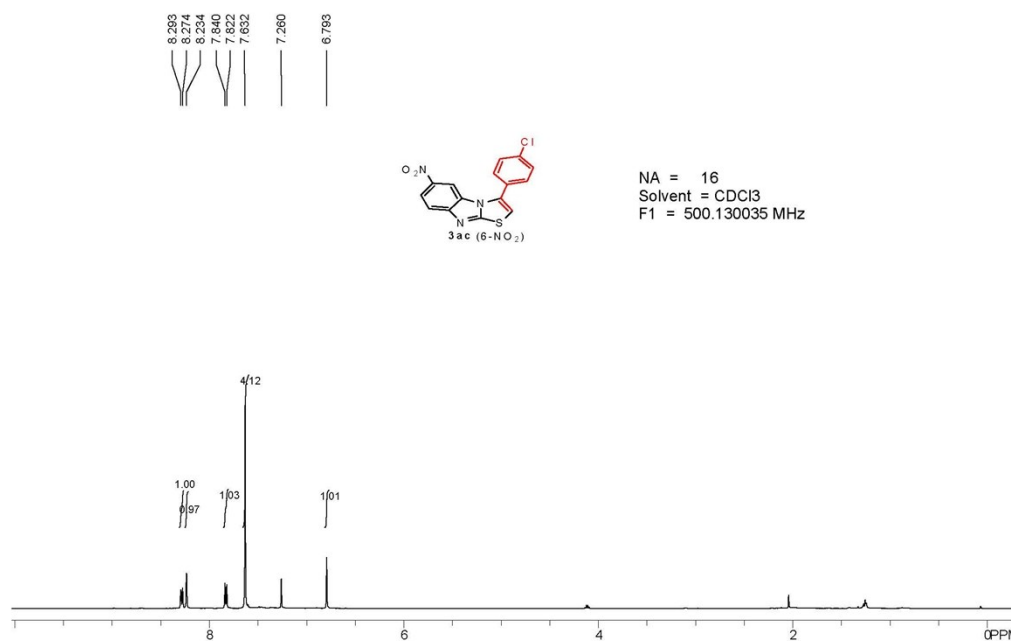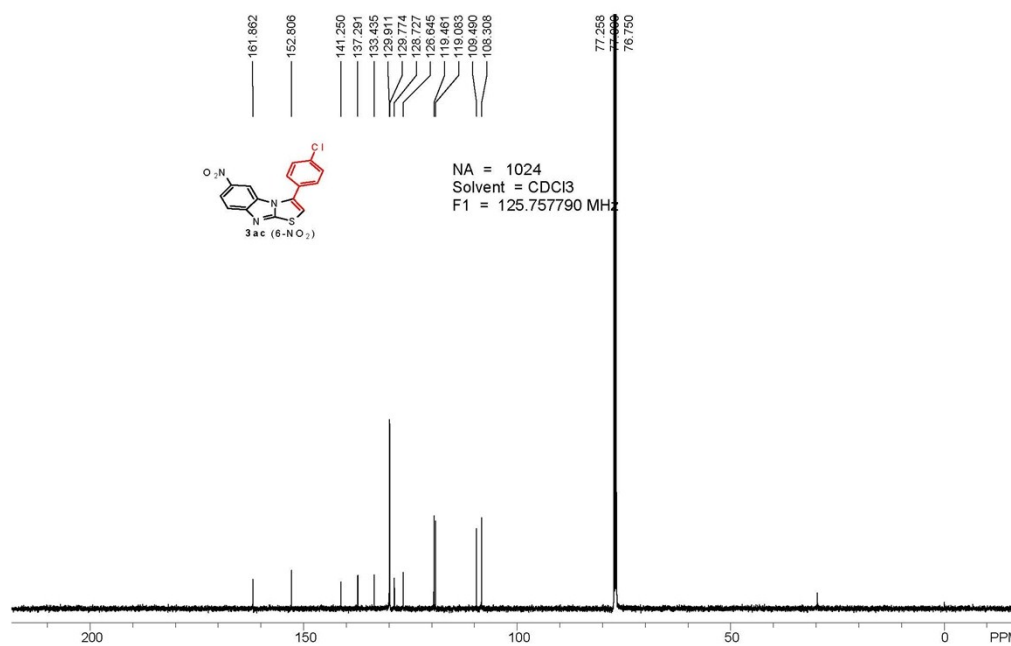

### 3-(4-Chlorophenyl)-6-methoxy-thiazolo [3,2-a] benzimidazole (3ad)

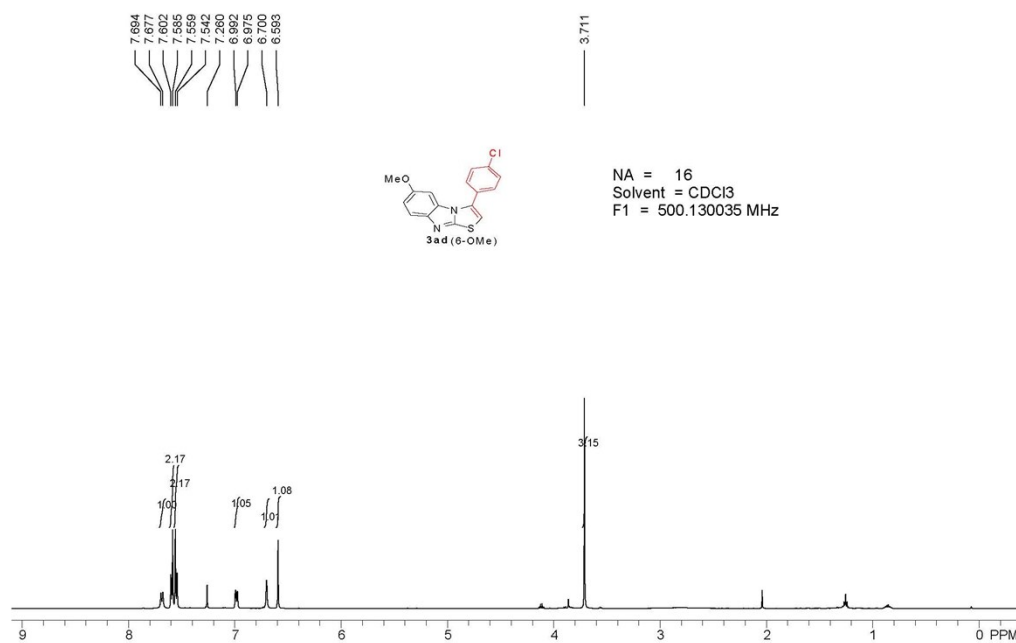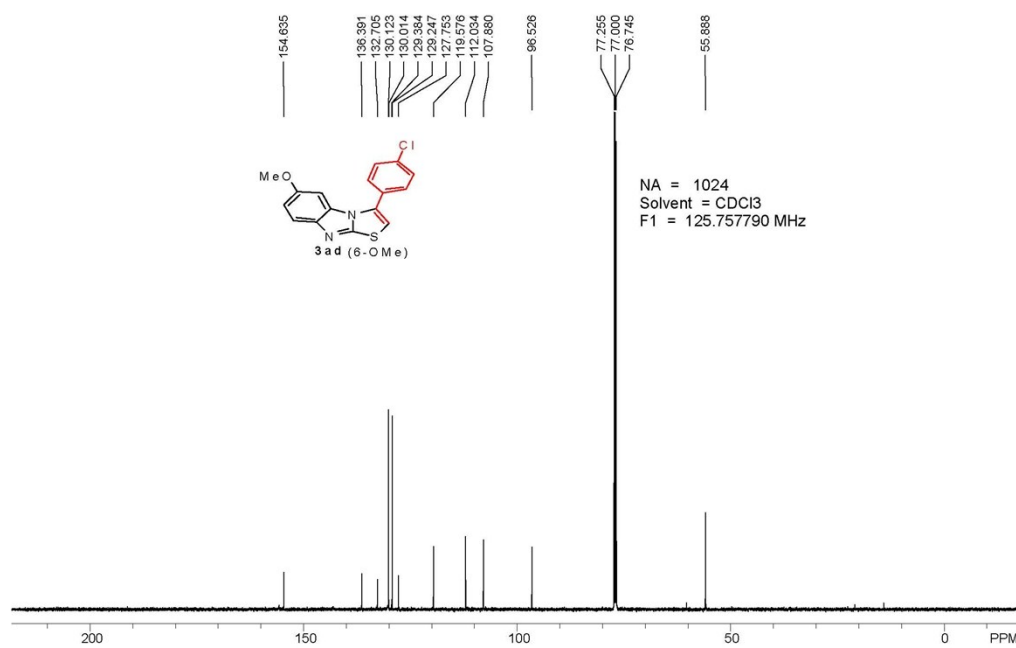

### 3-(4-Chlorophenyl)-7-methoxy-thiazolo[3,2-a]benzimidazole (3ad')

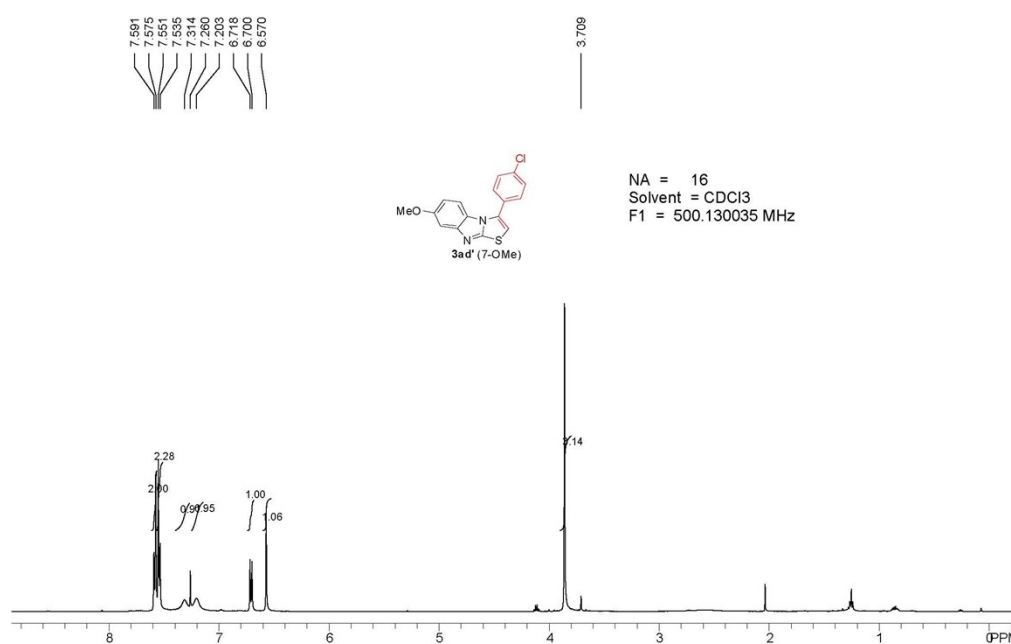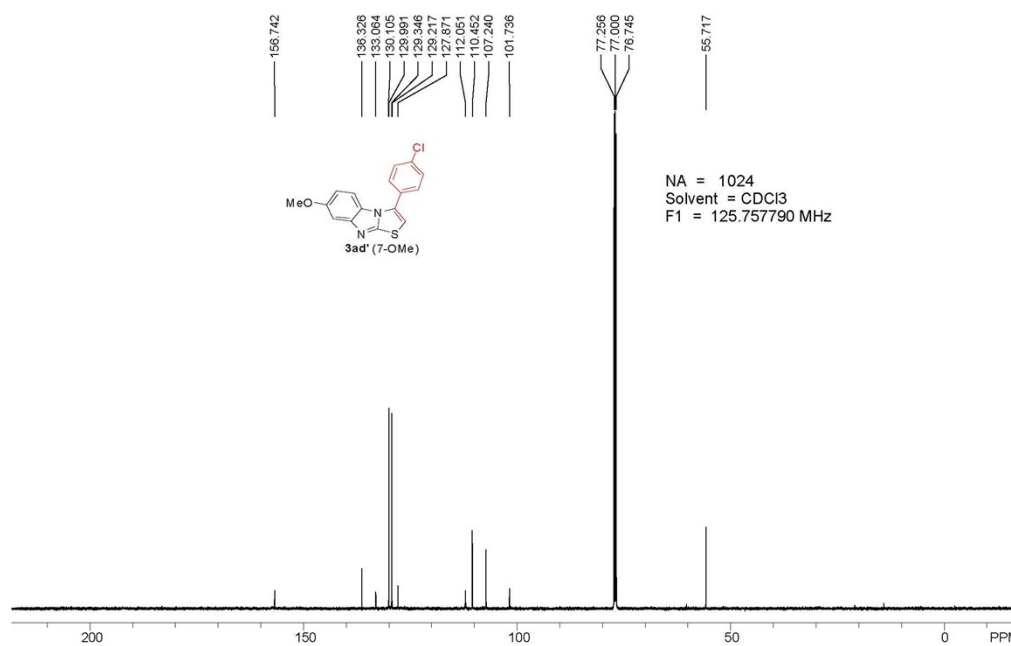

**3-(4-Chlorophenyl)-6-methyl-thiazolo[3,2-a]benzimidazole (3jb) and 3-(4-Chlorophenyl)-7-methyl-thiazolo[3,2-a]benzimidazole (3jb')**

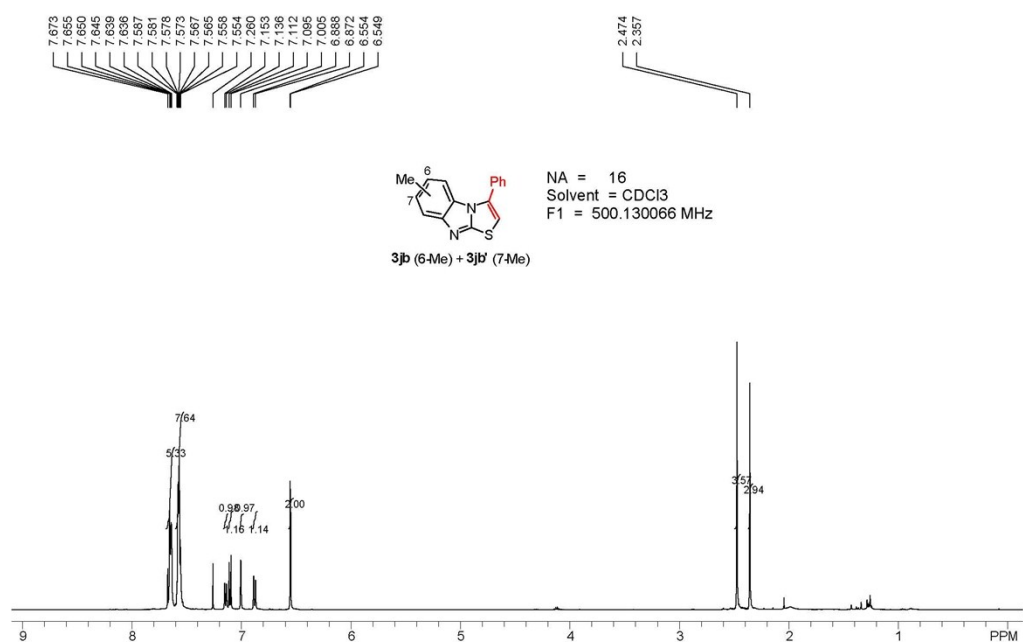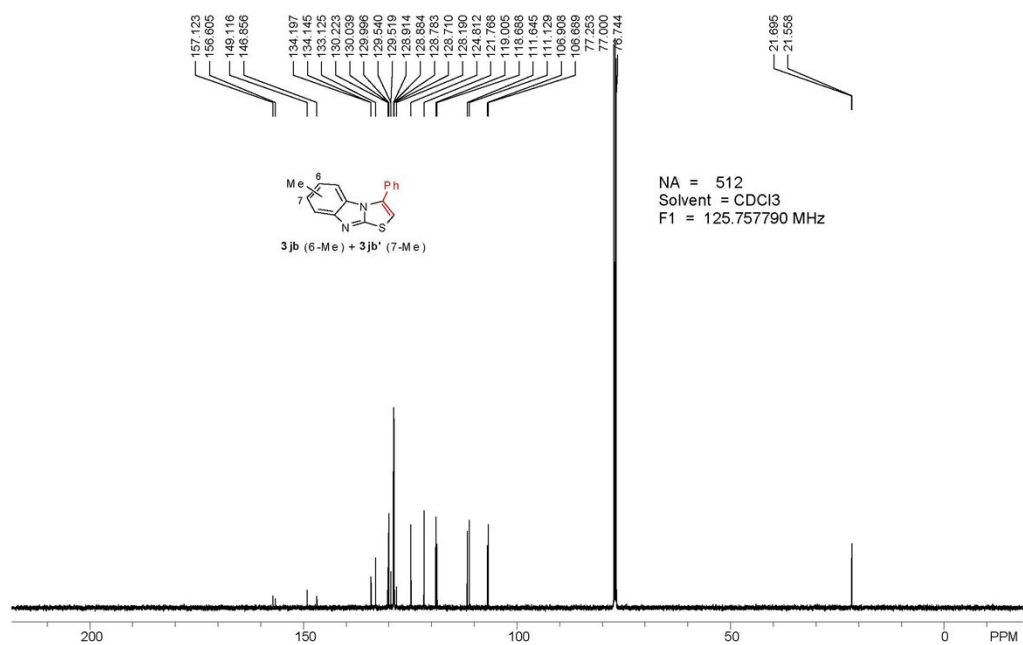



### 3-Phenyl-6-methoxy-thiazolo[3,2-a]benzimidazole (3jd)

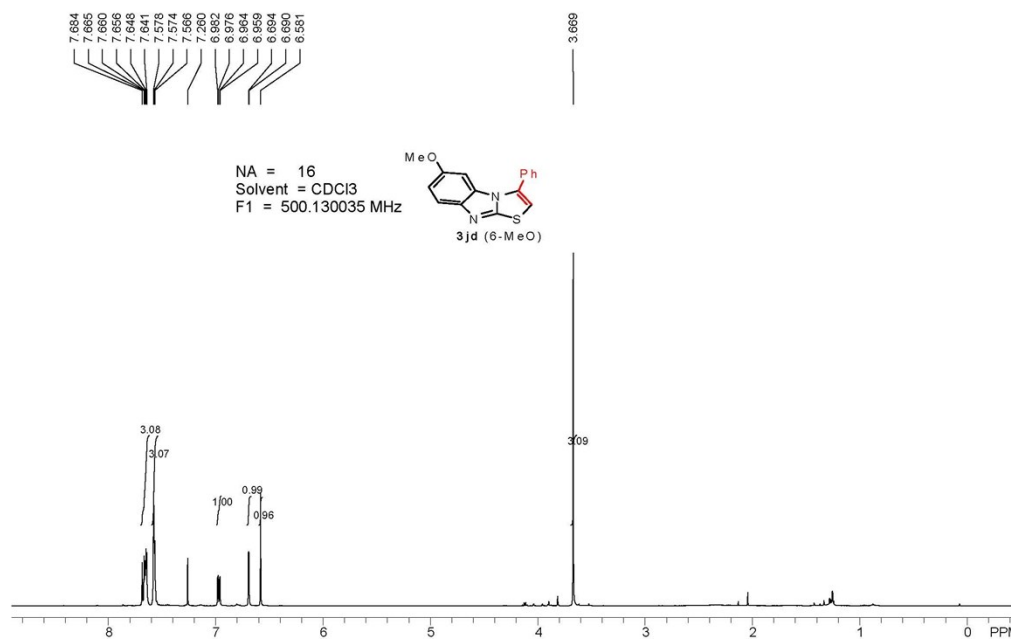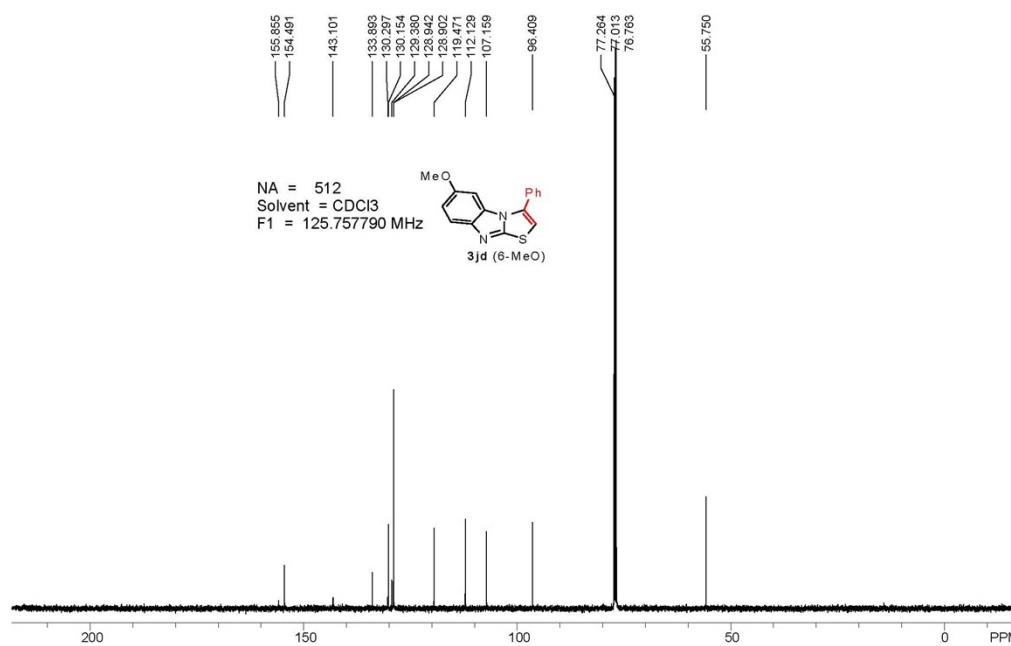

### 3-phenyl-7-methoxy-thiazolo[3,2-a]benzimidazole (3jd')

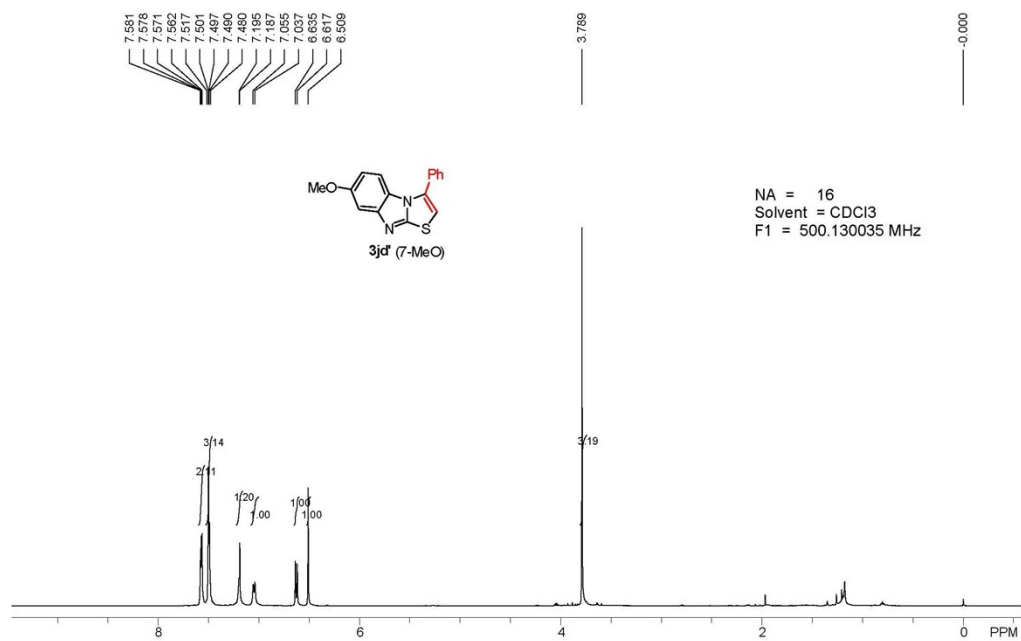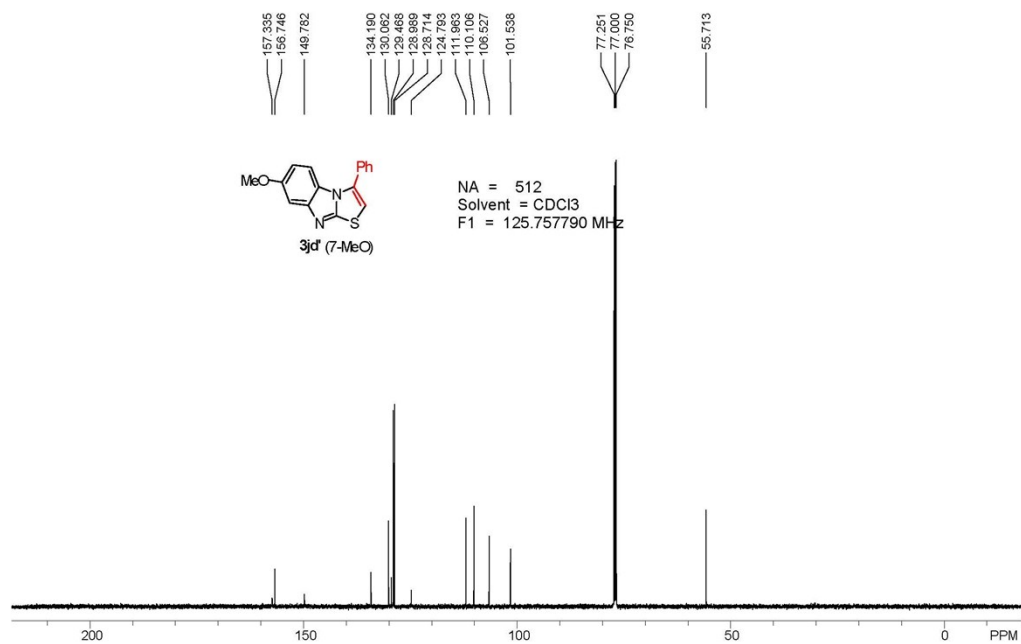

## 2-(4-Chlorophenyl)thiazolo[3, 2-a]benzimidazole (4aa)

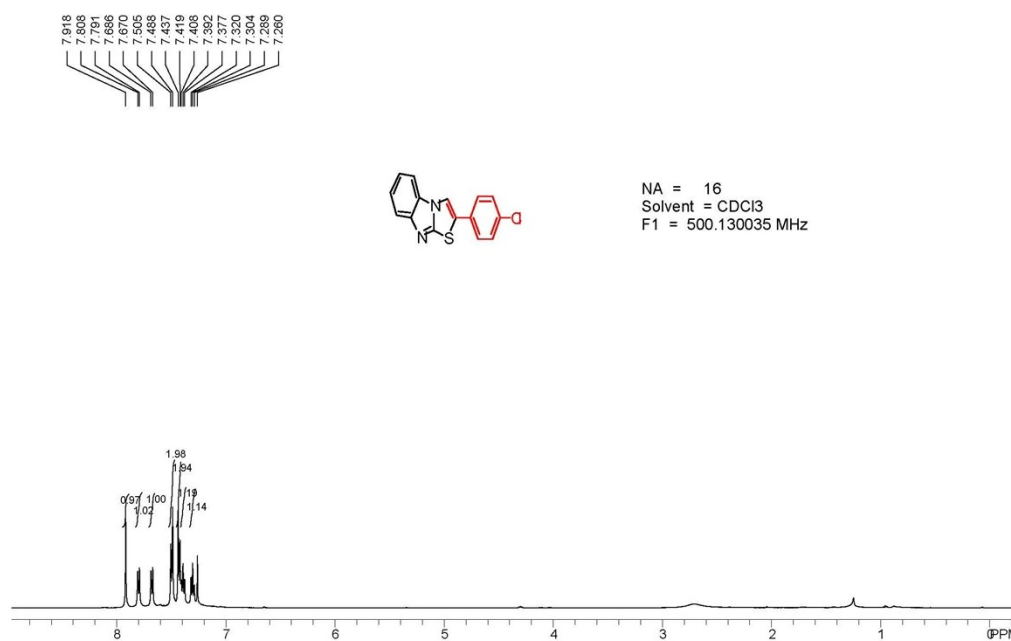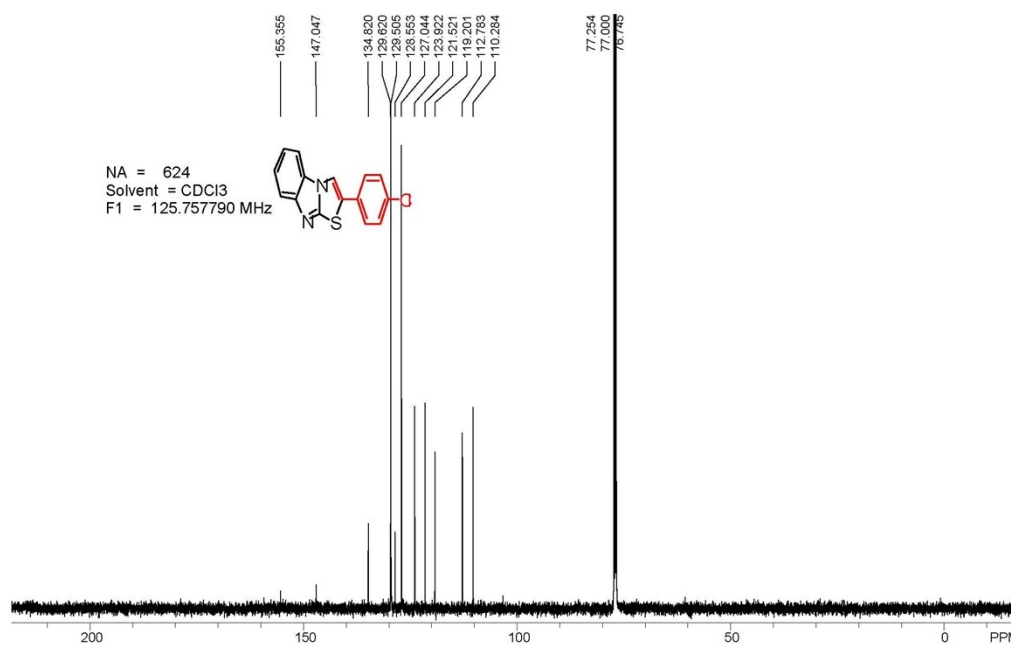

### 2-(4-Bromophenyl)thiazolo[3, 2-a]benzimidazole (4ba)

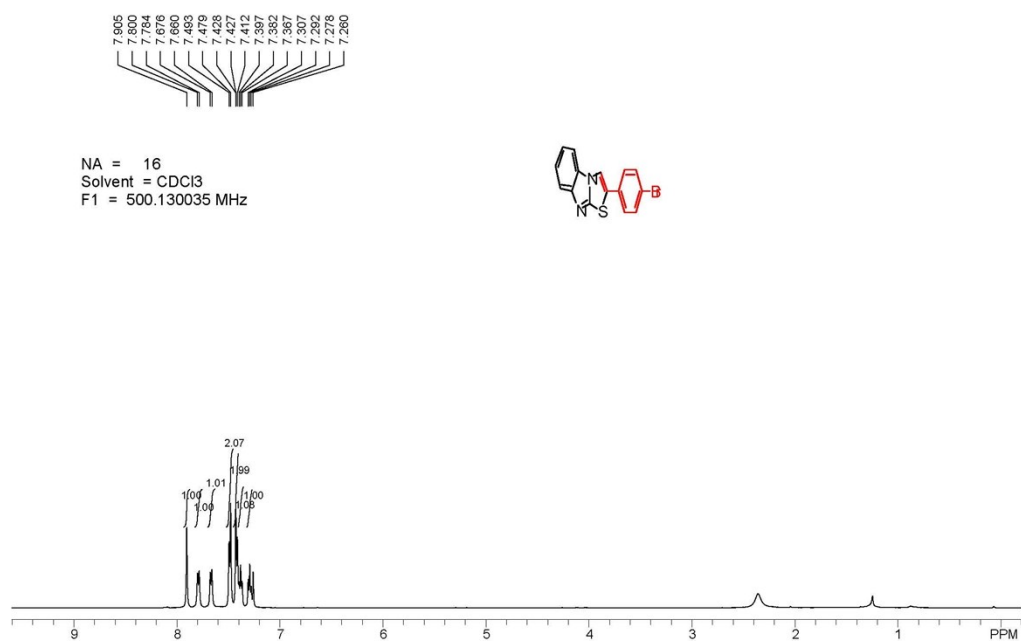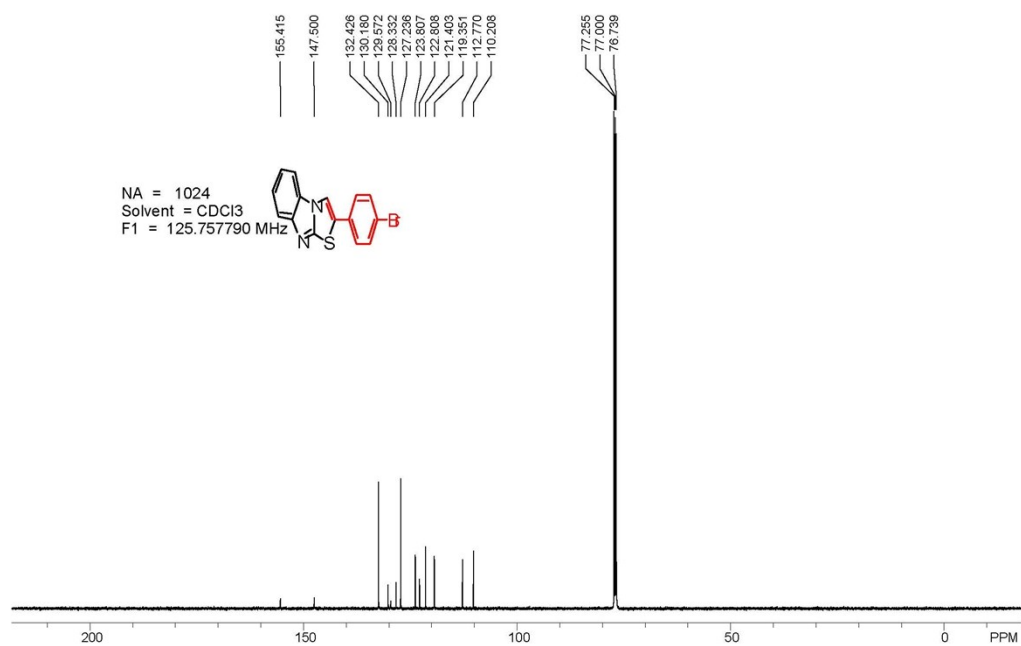

## 2-(4-Cyanophenyl)thiazolo[3, 2-a]benzimidazole (4da)

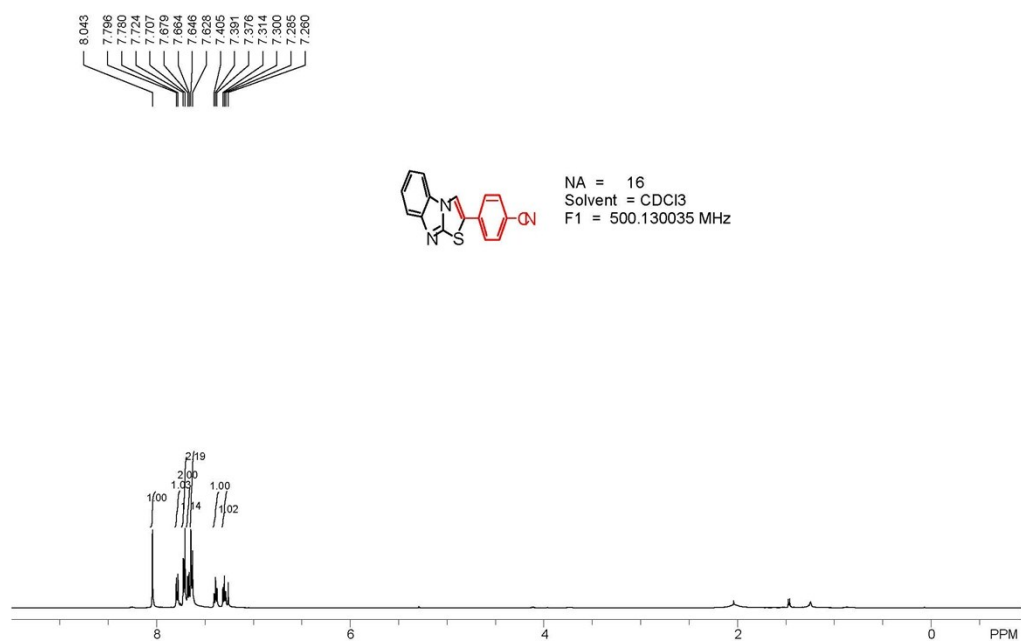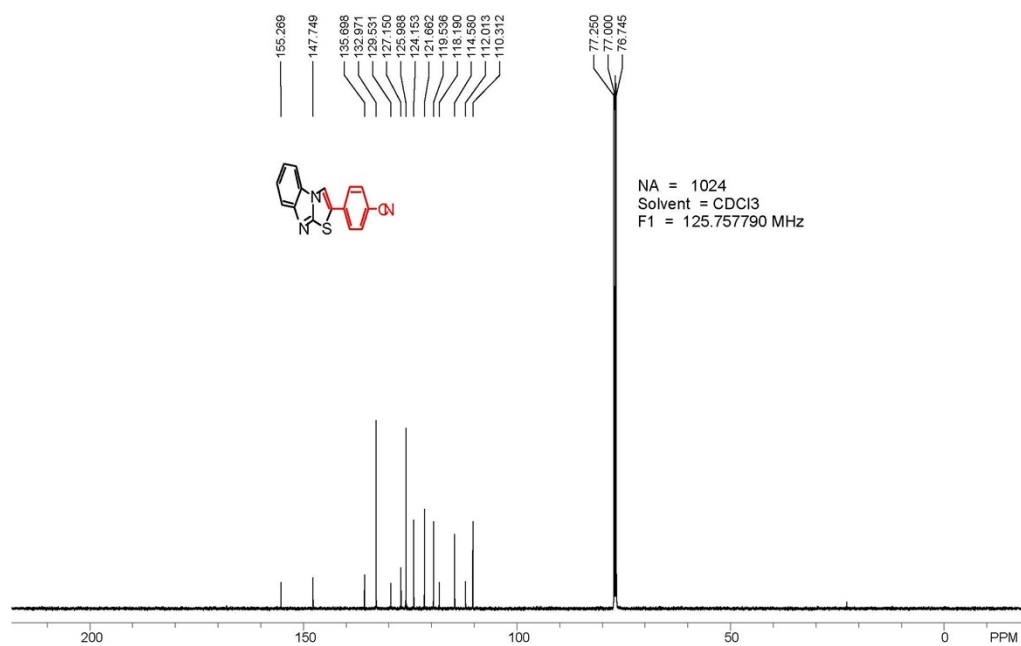

**2-(3,5-bis(trifluoromethyl)phenyl)thiazolo[3, 2-a]benzimidazole (4ka)**

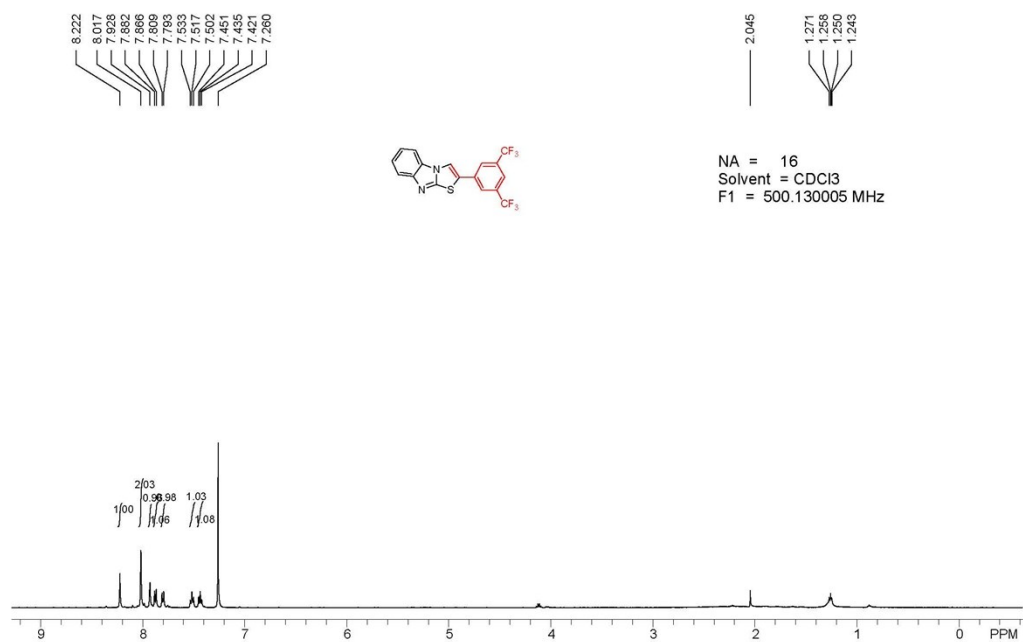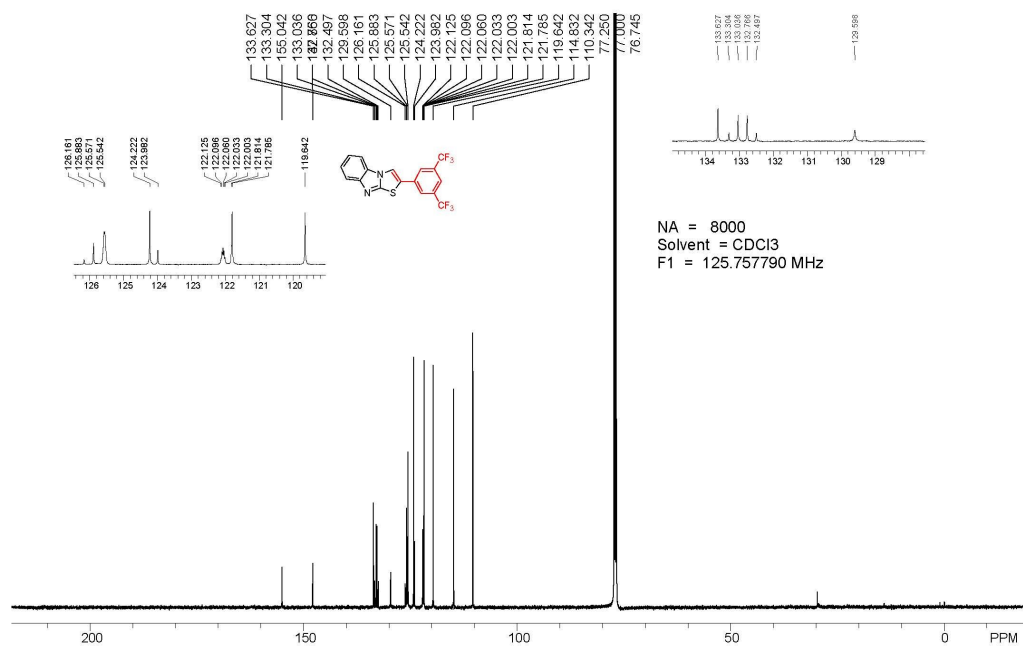

## 2-(4-Methoxyphenyl)thiazolo[3, 2-a]benzimidazole (4ga)

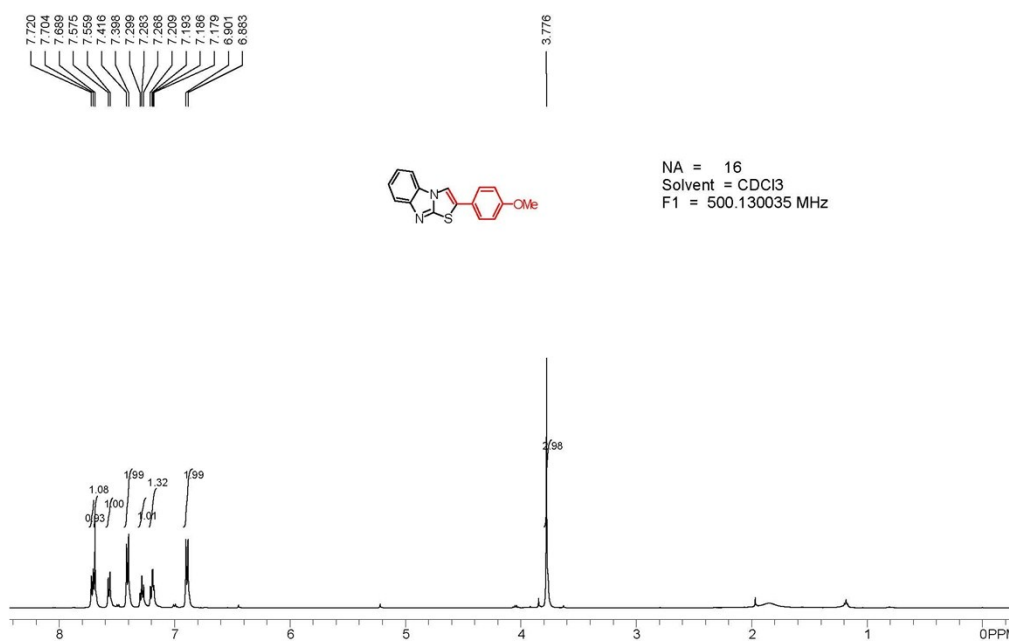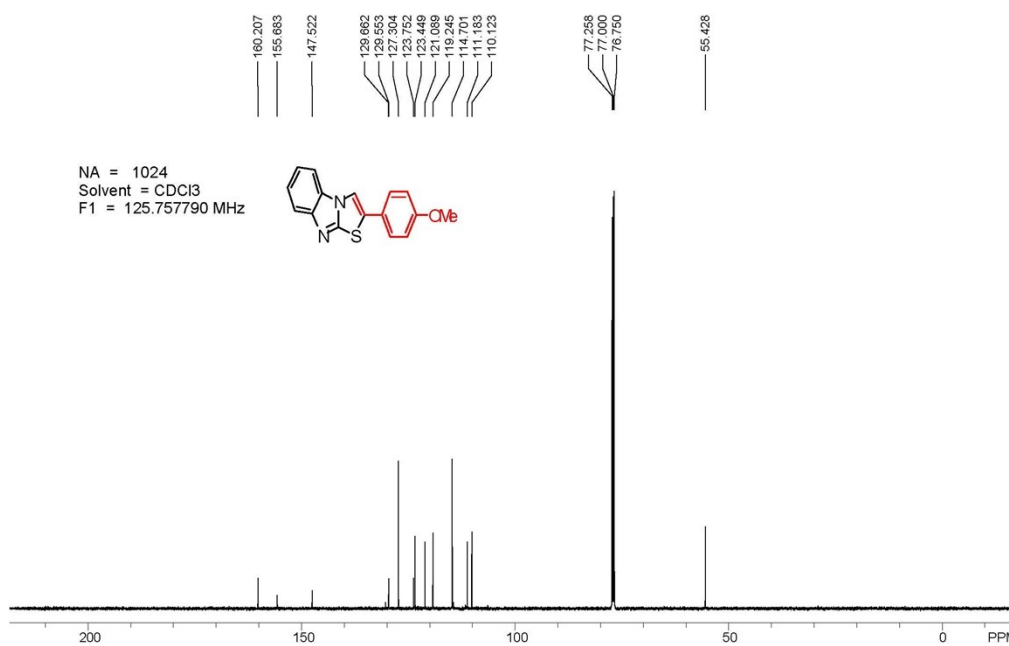

## 2-(4-Propylphenyl)thiazolo[3, 2-a]benzimidazole (4ha)

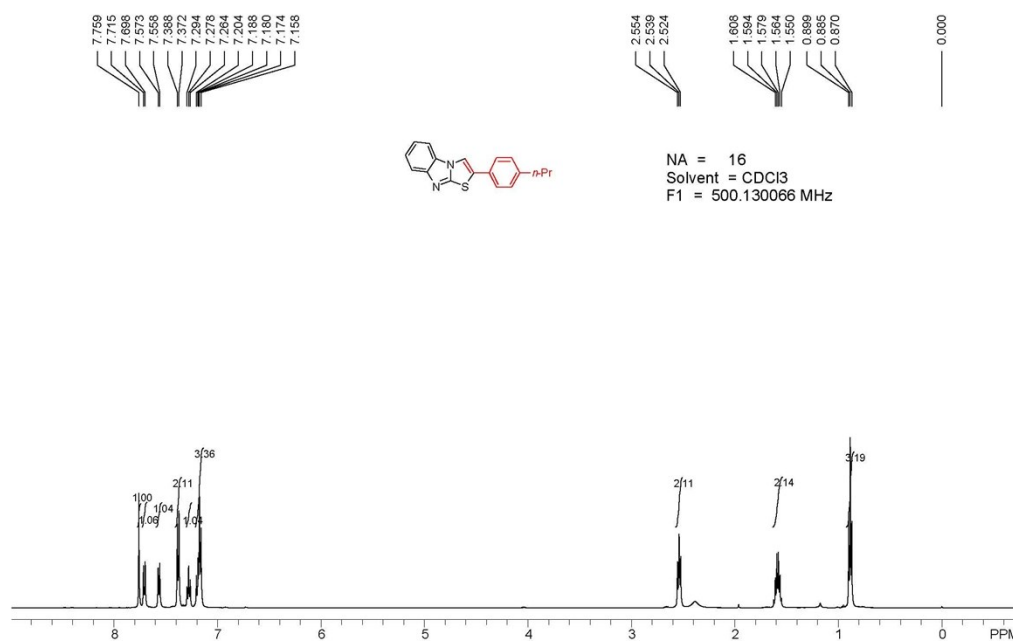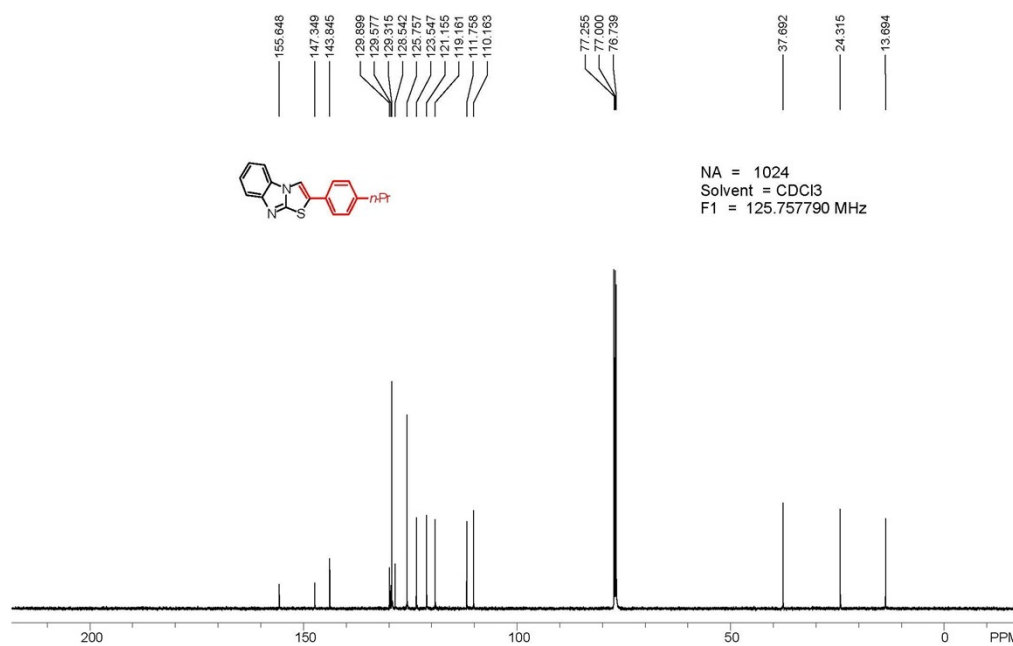



## 2-Thiophen-2-ylthiazolo[3,2-a]benzimidazole (4la)

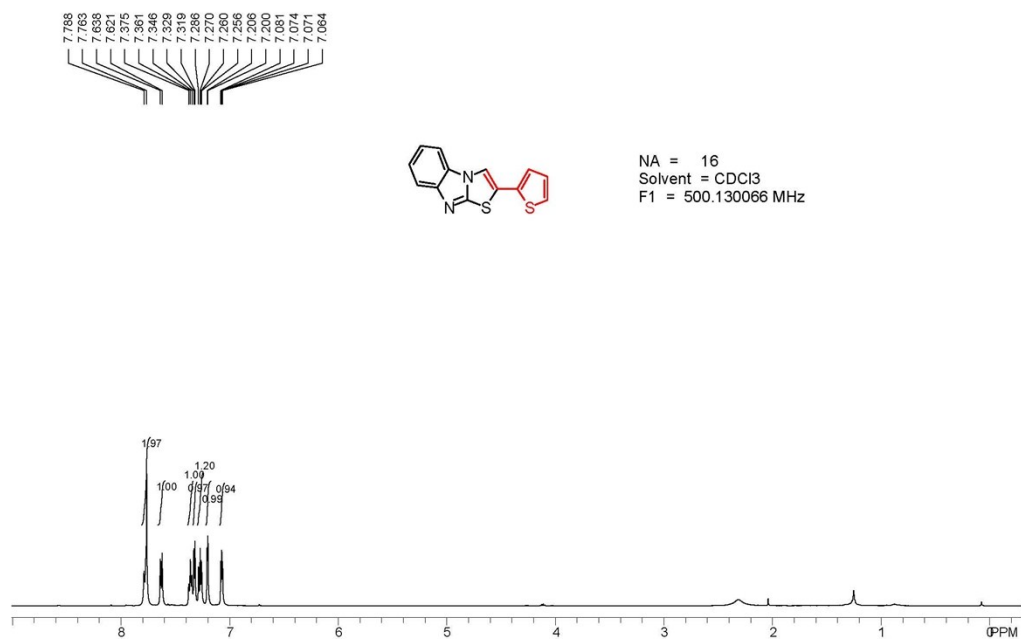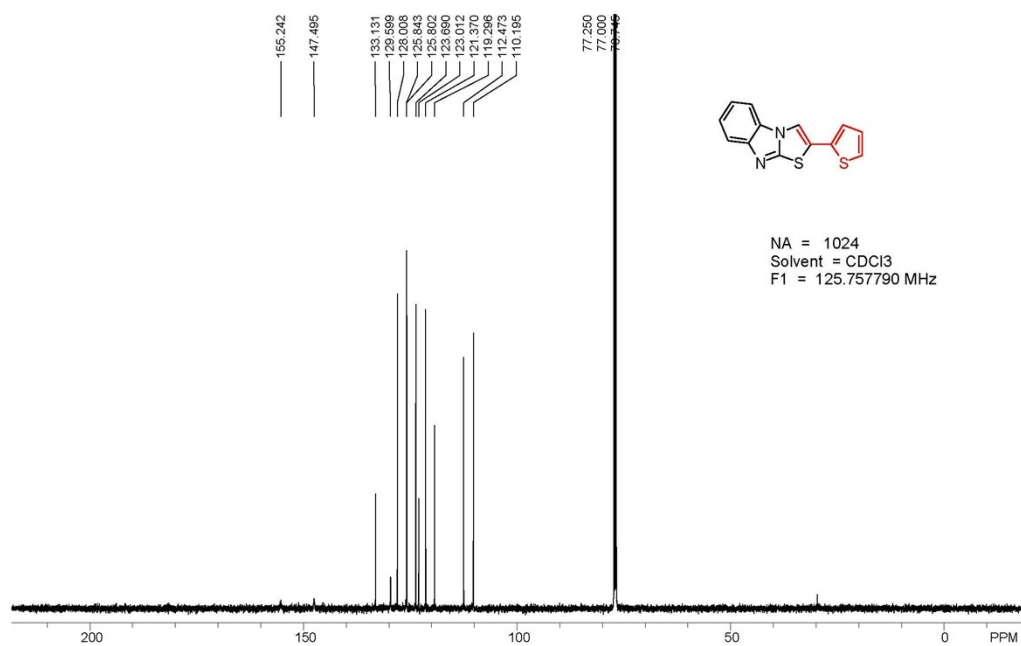

### 2-Pyridin-2-ylthiazolo[3,2-a]benzimidazole (4na)

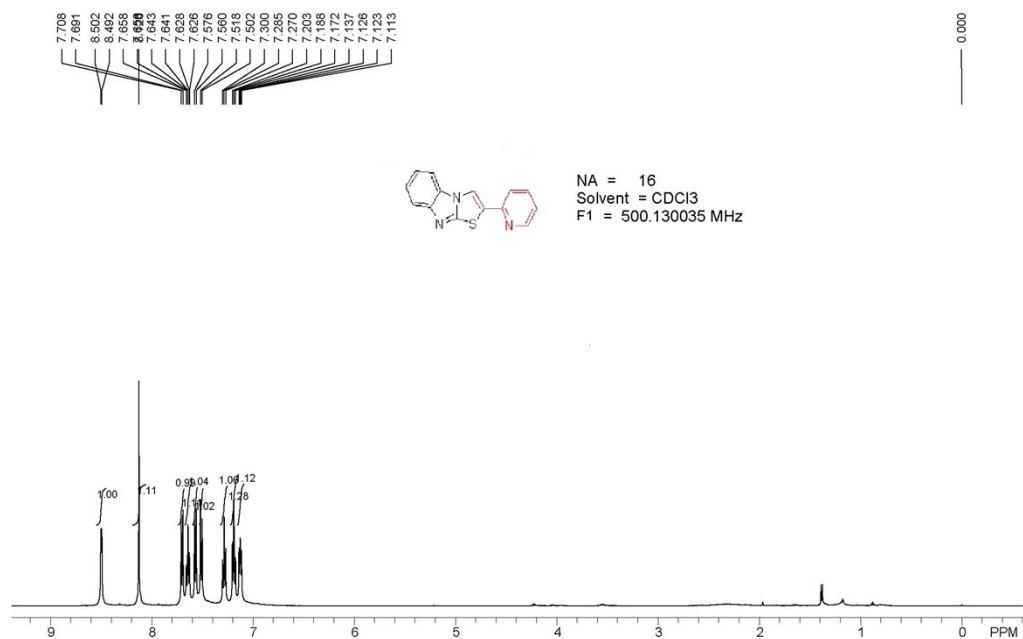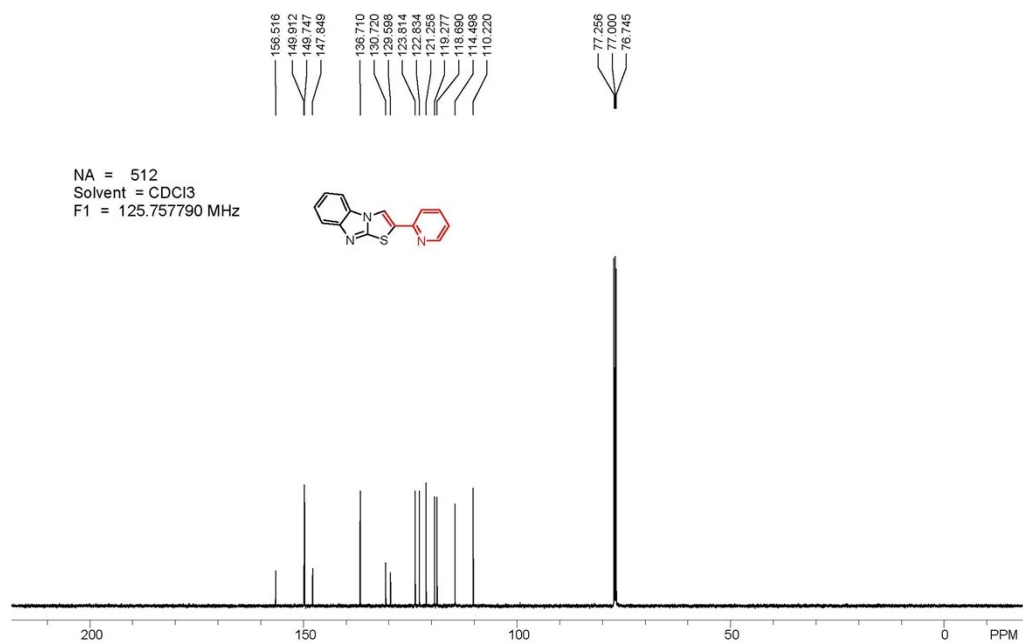

## 2-Pyridin-4-ylthiazolo[3,2-a]benzimidazole (40a)

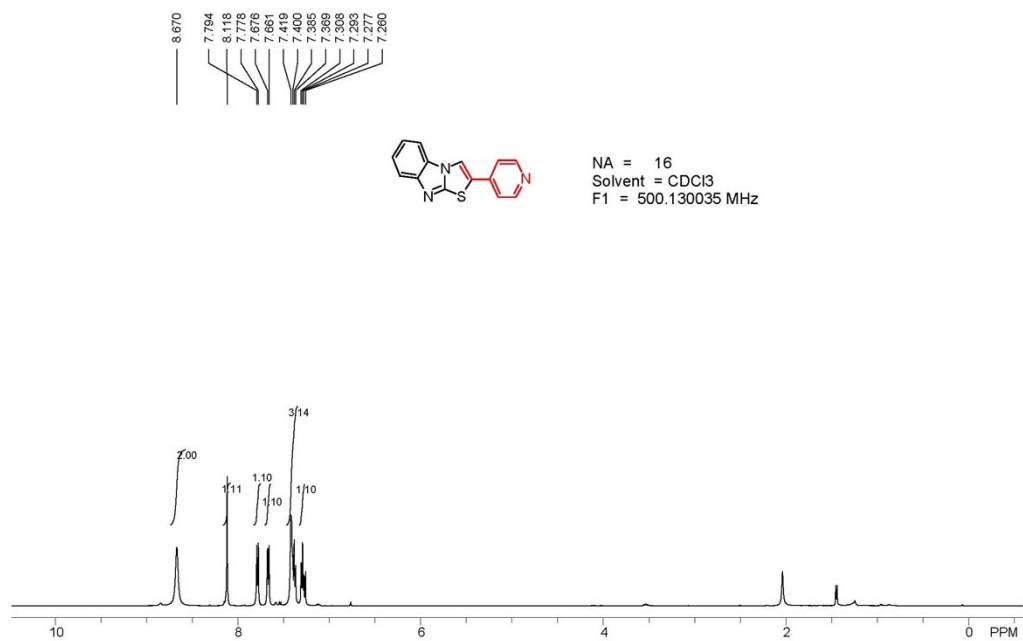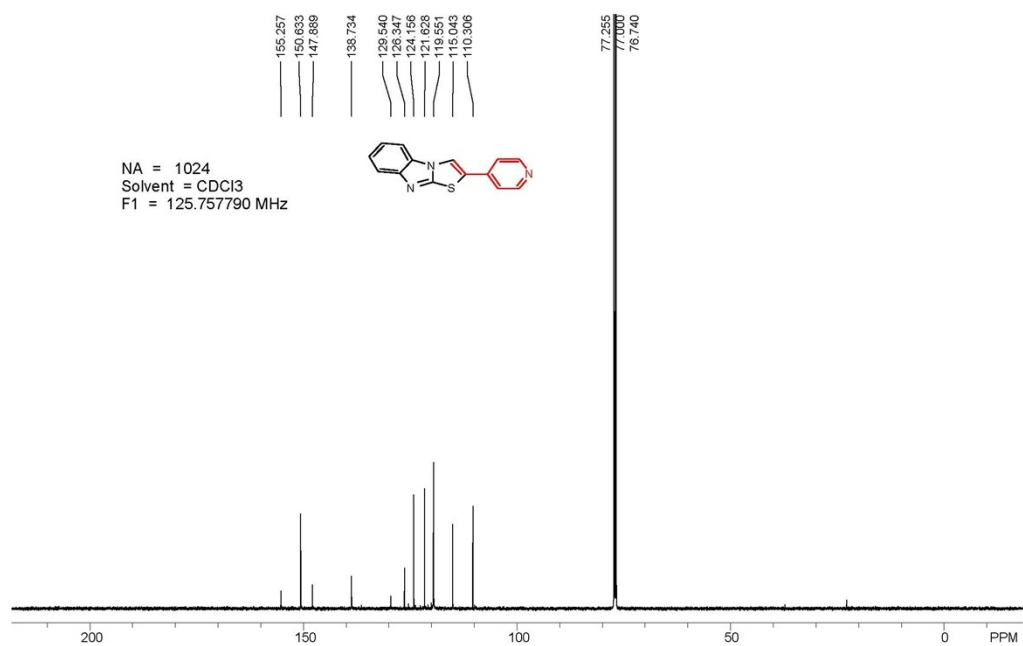

## 2-(Triethylsilyl)thiazolo[3,2-a]benzimidazole (4qa)

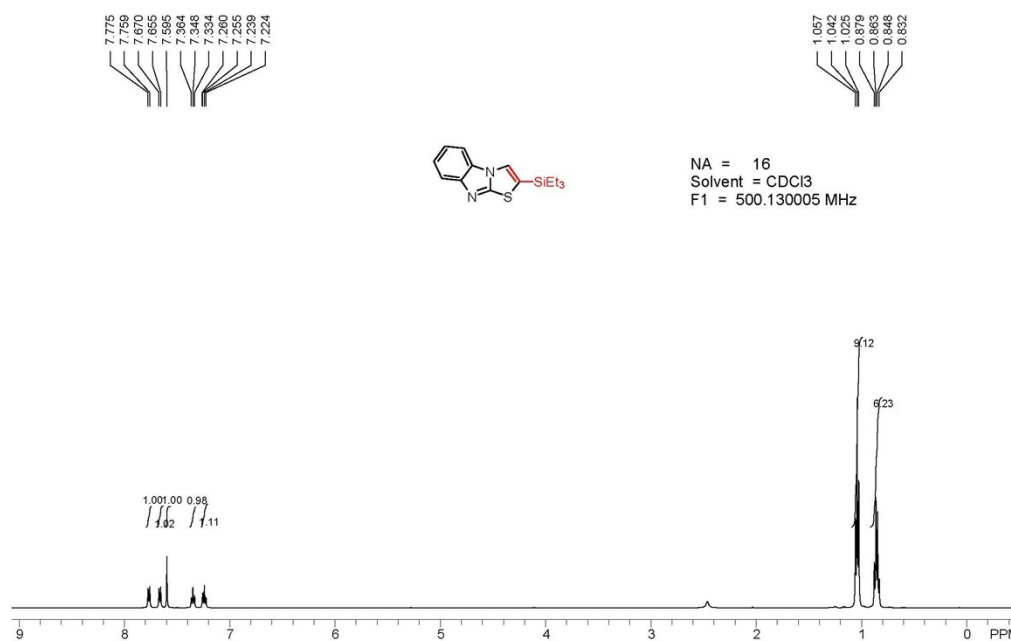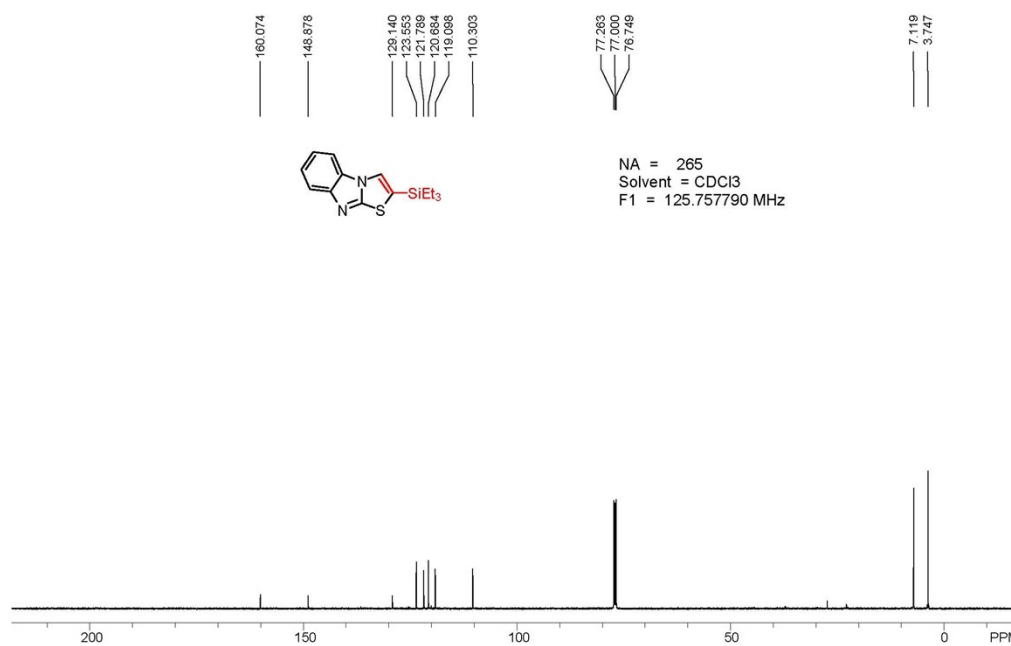

## 2-Butylthiazolo[3,2-a]benzimidazole (4ua)

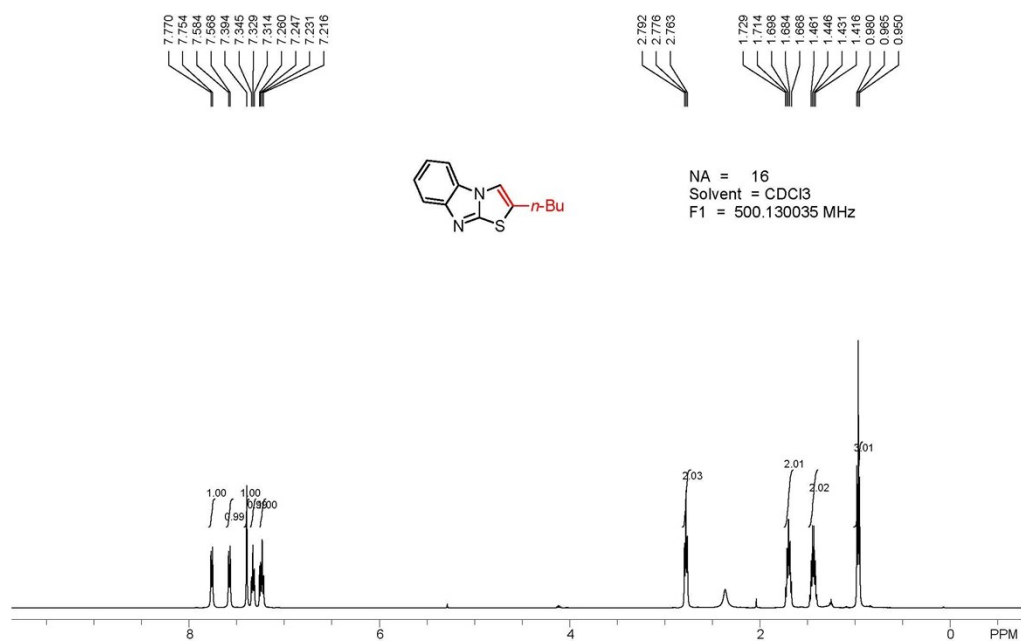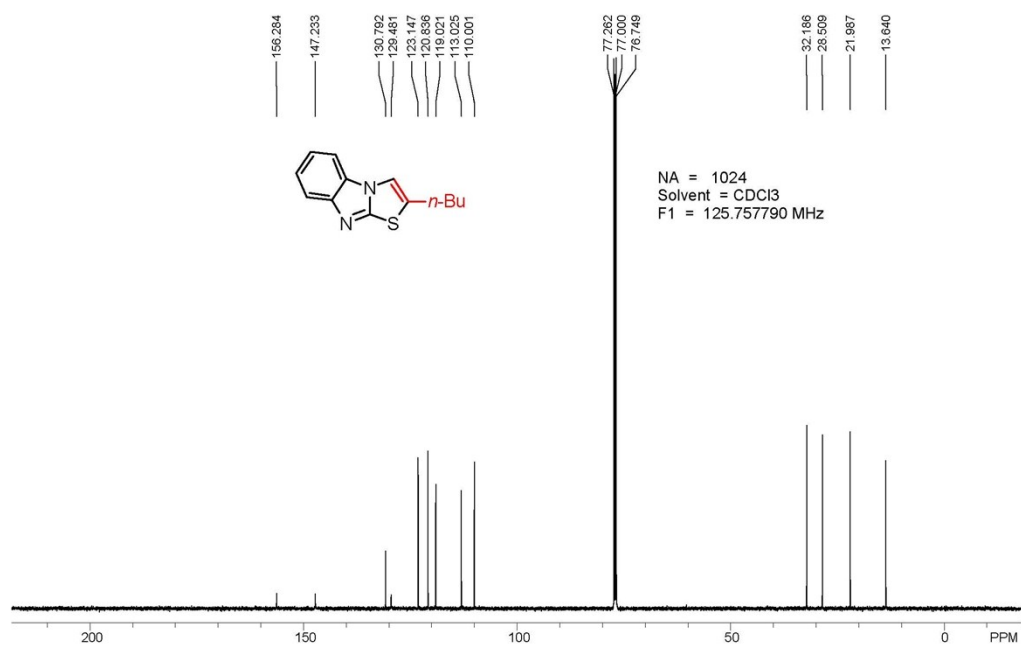

## 2-Phenoxymethylthiazolo[3,2-a]benzimidazole (4xa)

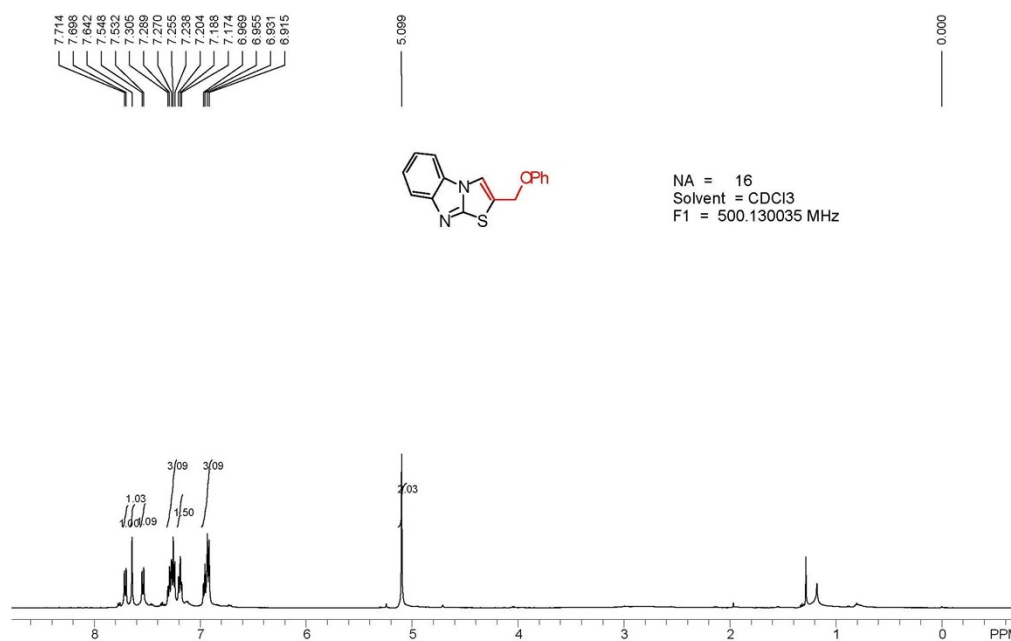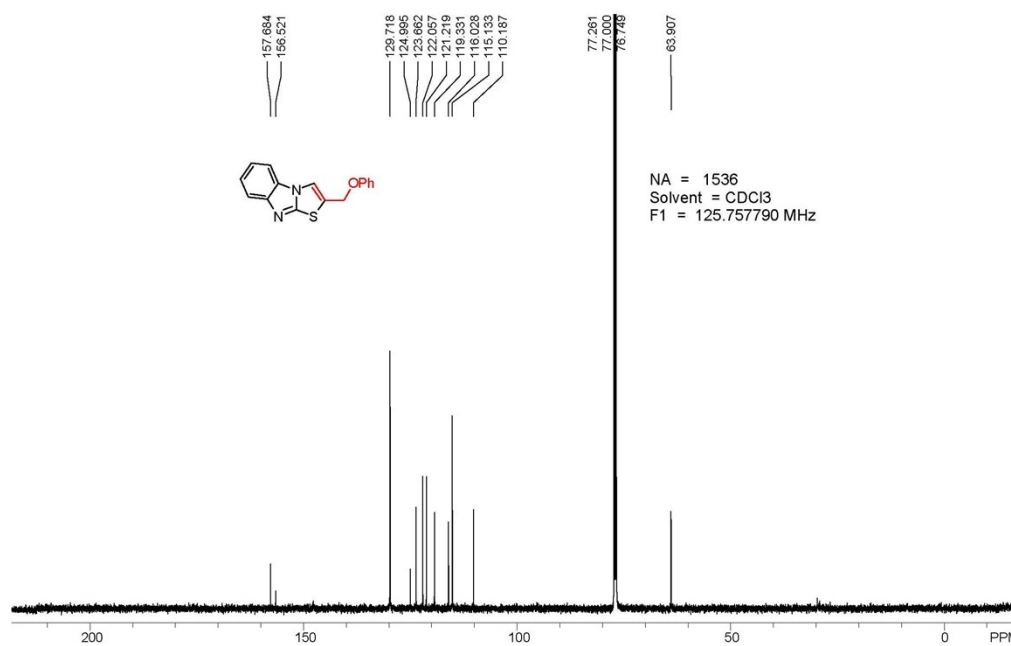

## 2-Phenylthiomethylthiazolo[3,2-a]benzimidazole (4ya)

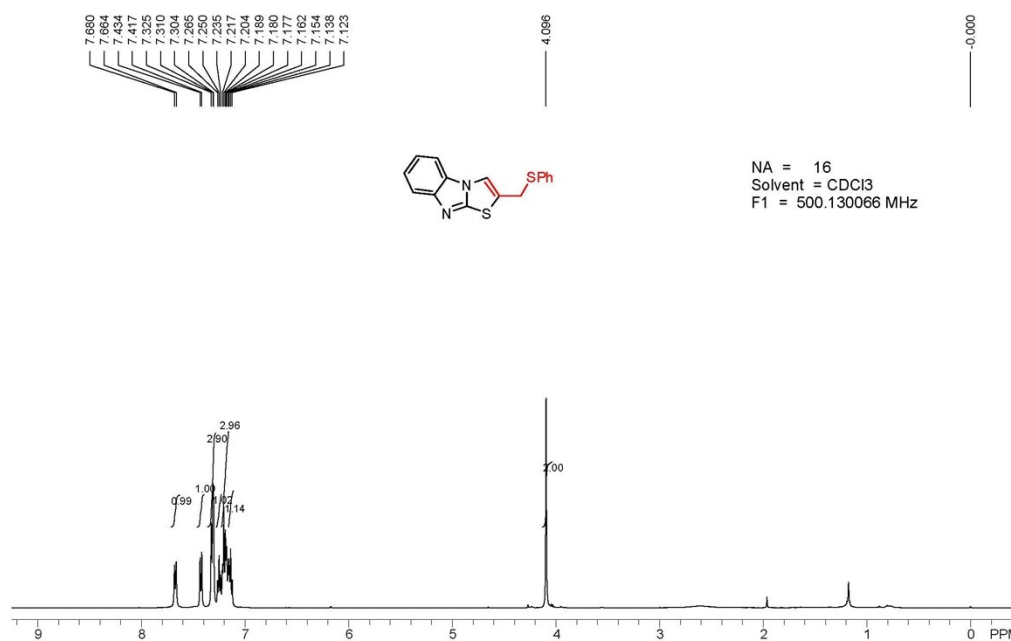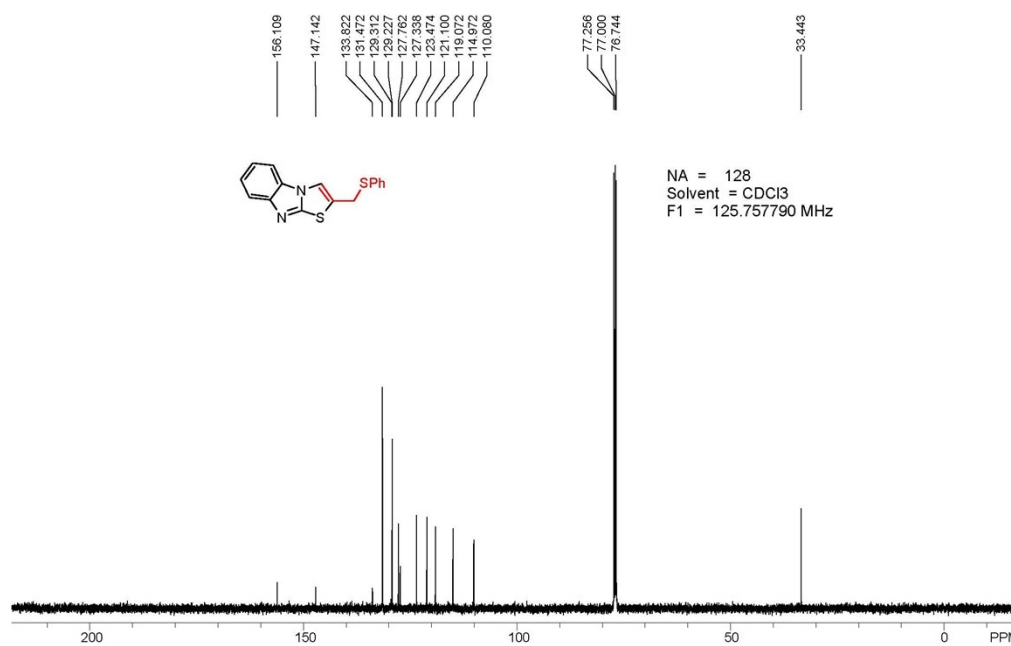

## Crystal data and structure refinement for **4na**

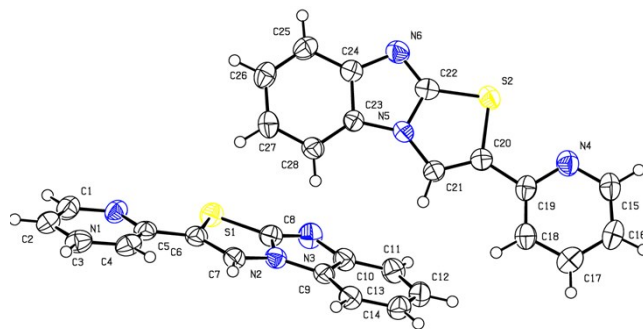

|                                                     |                                                                                                                                              |
|-----------------------------------------------------|----------------------------------------------------------------------------------------------------------------------------------------------|
| CCDC Number                                         | 1847875                                                                                                                                      |
| Empirical formula                                   | C <sub>14</sub> H <sub>9</sub> N <sub>3</sub> S                                                                                              |
| Formula weight                                      | 251.30                                                                                                                                       |
| Crystal size, mm <sup>3</sup>                       | 0.05 × 0.04 × 0.03                                                                                                                           |
| Temperature, <i>T</i>                               | 298(2) K                                                                                                                                     |
| Wavelength, $\lambda$ (Å)                           | 0.71073                                                                                                                                      |
| Crystal system                                      | Orthorhombic                                                                                                                                 |
| Space group                                         | P c a 21                                                                                                                                     |
| Unit cell dimensions                                | <i>a</i> = 22.656(3) Å<br><i>b</i> = 5.7765(7) Å<br><i>c</i> = 17.163(2) Å<br>$\alpha = 90^\circ$ , $\gamma = 90^\circ$ , $\beta = 90^\circ$ |
| Volume, <i>V</i> (Å <sup>3</sup> )                  | 2246.2(5)                                                                                                                                    |
| <i>Z</i>                                            | 8                                                                                                                                            |
| Calculated density, Mg·m <sup>-3</sup>              | 1.486                                                                                                                                        |
| Absorption coefficient, $\mu$ (mm <sup>-1</sup> )   | 0.270                                                                                                                                        |
| <i>F</i> (000)                                      | 1040                                                                                                                                         |
| $\theta$ range for data collection                  | 1.80° to 25.50°                                                                                                                              |
| Limiting indices                                    | $-27 \leq h \leq 27$ , $-6 \leq k \leq 6$ ,<br>$-20 \leq l \leq 20$                                                                          |
| Reflection collected/unique                         | 18087 / 4147 [R(int) = 0.0413]                                                                                                               |
| Completeness to $\theta = 25.50$                    | 99.9 %                                                                                                                                       |
| Absorption correction                               | Semi-empirical from equivalents                                                                                                              |
| Max. and min. transmission                          | 0.9607 and 0.9381                                                                                                                            |
| Refinement method                                   | ' SHELXL-2016/6 ' Full-matrix least-squares on <i>F</i> <sup>2</sup>                                                                         |
| Data/restraints/parameters                          | 4147 / 1 / 326                                                                                                                               |
| Goodness-of-fit on <i>F</i> <sup>2</sup>            | 1.090                                                                                                                                        |
| Final <i>R</i> indices [ <i>I</i> > 2σ( <i>I</i> )] | <i>R</i> 1 = 0.0366, <i>wR</i> 2 = 0.0976                                                                                                    |
| <i>R</i> indices (all data)                         | <i>R</i> 1 = 0.0380, <i>wR</i> 2 = 0.0988                                                                                                    |
| Largest diff. peak and hole                         | 0.304 and -0.308 e·Å <sup>-3</sup>                                                                                                           |
| Absolute structure parameter                        | 0.14(7)                                                                                                                                      |
| Extinction coefficient                              | 0.0145(14)                                                                                                                                   |
